# Supplementary material for: A Cardiac Mitochondrial FGFR1 Mediates the Antithetical Effects of FGF2 Isoforms on Permeability Transition
Source: MDPI journal article supplement (doi:10.3390/cells10102735), 2021-10-13

**Figure S1 Testing of anti-pY- FGFR1 antibodies**

Human endothelial kidney (HEK) 293 cells were transfected or not with a plasmid expressing mouse FGFR1 and stimulated or not with Lo-FGF2 (10 ng/ml, 15 minutes). Subsequently, cell lysates were analyzed by western blotting and probed with antibodies for pY766-FGFR1, pY653/654-FGFR1, or beta ( $\beta$ )-tubulin, as indicated. Untransfected cells presented negligible signal for pY766-FGFR1 , and detectable signal for pY653/654-FGFR1. In both cases, the immunoreactive signal increased substantially in transfected cells, especially after stimulation with Lo-FGF2. Intensity of signal for  $\beta$ -tubulin (loading control) appeared similar between the different samples.

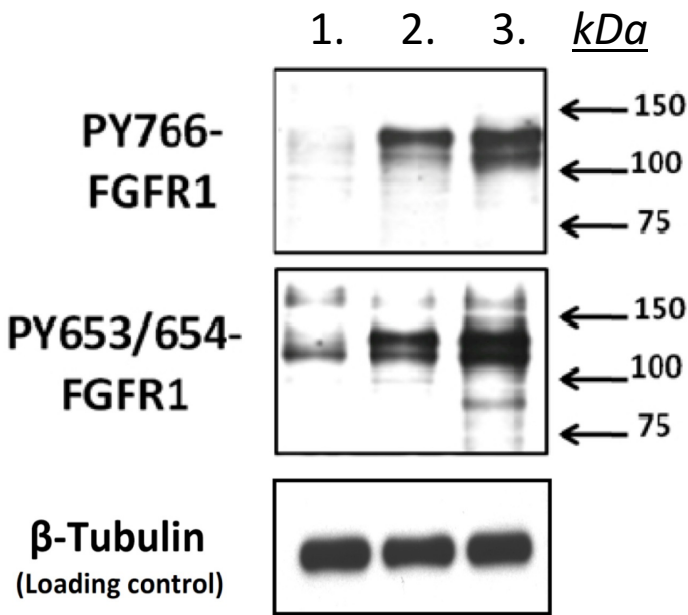

1. Untransfected HEK 293 cells
2. Cells transfected with cDNA for FGFR1
3. Cells transfected with a cDNA for FGFR1 + FGF2

**Figure S2. Lo-FGF2 promotes mito-FGFR1 phosphorylation in hearts.** Western blot staining of cardiac mitochondria (IFM) from saline-perfused (lanes 1,2,3, three preparations) and hearts stimulated with Lo-FGF2 for 15 minutes, lanes 4,5,6, three preparations) for pY-FGFR1. Ponceau S staining indicates similar protein loading between all lanes. A stronger signal for immunoreactive bands (70-110 kDa) can be observed in lanes 4,5 and 6, compared to lanes 1,2 and 3.

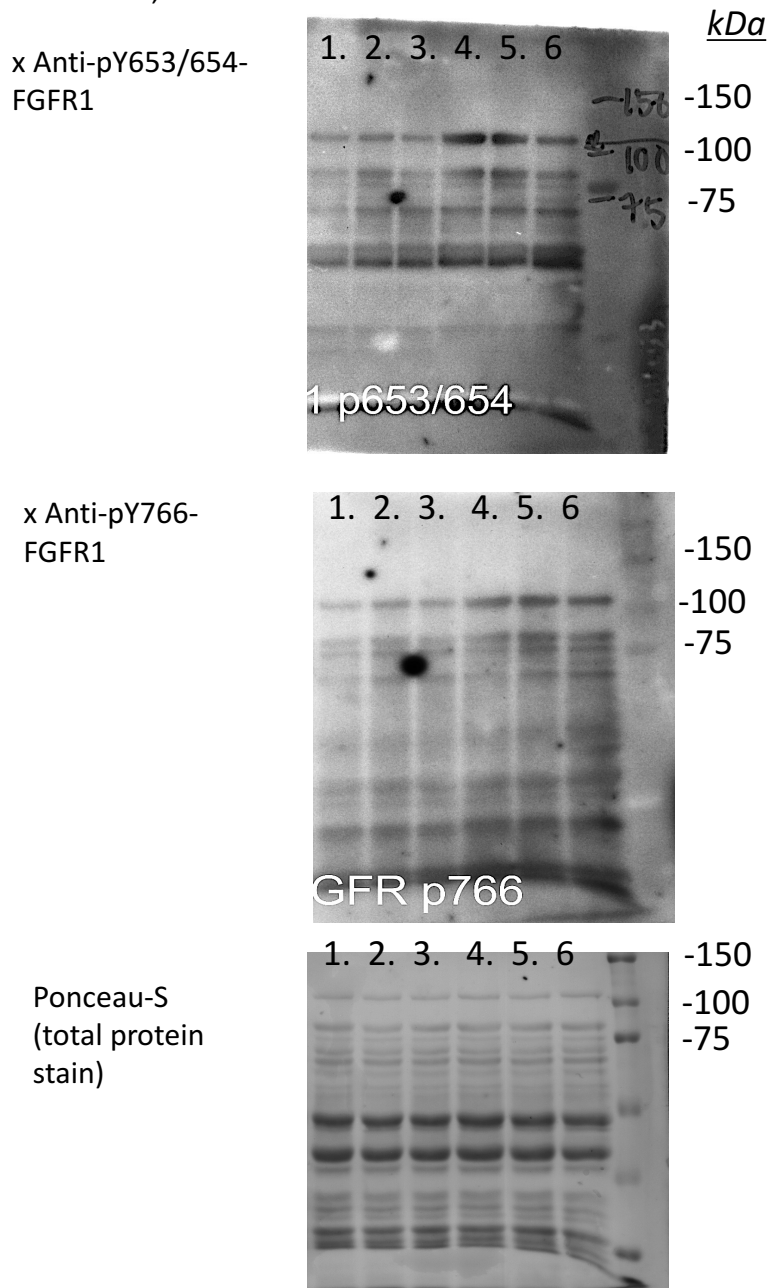

Methodology for whole heart perfusion with a Lo-FGF2 containing buffer for 15 minutes, is described in references #17, and #32 (PhD thesis of the first author). Mitochondrial samples (20 microg/lane) were analyzed in 7.5% polyacrylamide gels.

**Table S1.** The effect of calcium overload, Lo-FGF2, and PKC $\epsilon$  inhibitors on cardiac (SSM) mitochondrial Optical Density (OD) at 545 nM

|                                                                              | Control        | Lo-FGF2        | Lo-FGF2 +<br>eV1-2 | Lo-FGF2 +<br>scrambled<br>peptide |
|------------------------------------------------------------------------------|----------------|----------------|--------------------|-----------------------------------|
| <b>Calcium Retention<br/>Capacity</b><br>(nM Ca <sup>2+</sup> /mg protein)   | 500 $\pm$ 72   | 936 $\pm$ 5.8* | 375 $\pm$ 56       | 900 $\pm$ 13.5*                   |
| <b>Rate of swelling</b><br>(OD <sub>545</sub> $\times$ 10 <sup>3</sup> /min) | 73.1 $\pm$ 5.6 | 75.5 $\pm$ 9.9 | 61.8 $\pm$ 5.4     | 75.2 $\pm$ 6.6                    |
| <b>Amplitude of swelling</b><br>(% of maximal<br>swelling)                   | 30.0 $\pm$ 0.3 | 29.3 $\pm$ 2.5 | 29.6 $\pm$ 2.3     | 32.9 $\pm$ 3.3                    |

**Table S2.** The effect of Lo-FGF2 on cardiac mitochondria (SSM)  
Respiration

|                | Rate of Respiration |            | RCI<br>(State 3/<br>State 4) | ADP/O<br>ratio<br>nmol ADP/<br>nmol O <sub>2</sub> | Rate of Oxidative<br>Phosphorylation<br>(nmol ATP/min/<br>mg protein) |
|----------------|---------------------|------------|------------------------------|----------------------------------------------------|-----------------------------------------------------------------------|
|                | State 3             | State 4    |                              |                                                    |                                                                       |
| <b>Control</b> | 154.3 ± 6.7         | 19.9 ± 1.2 | 7.79 ± 0.26                  | 2.51 ± 0.05                                        | 387.3 ± 19.5                                                          |
| <b>Lo-FGF2</b> | 171.3 ± 10.3        | 20.0 ± 2.4 | 8.85 ± 0.87                  | 2.56 ± 0.04                                        | 437.9 ± 25.8                                                          |



December 7, 2007

ADP+oligo + FGF-2 (50ng) + 50 mM  $\text{Ca}^{2+}$

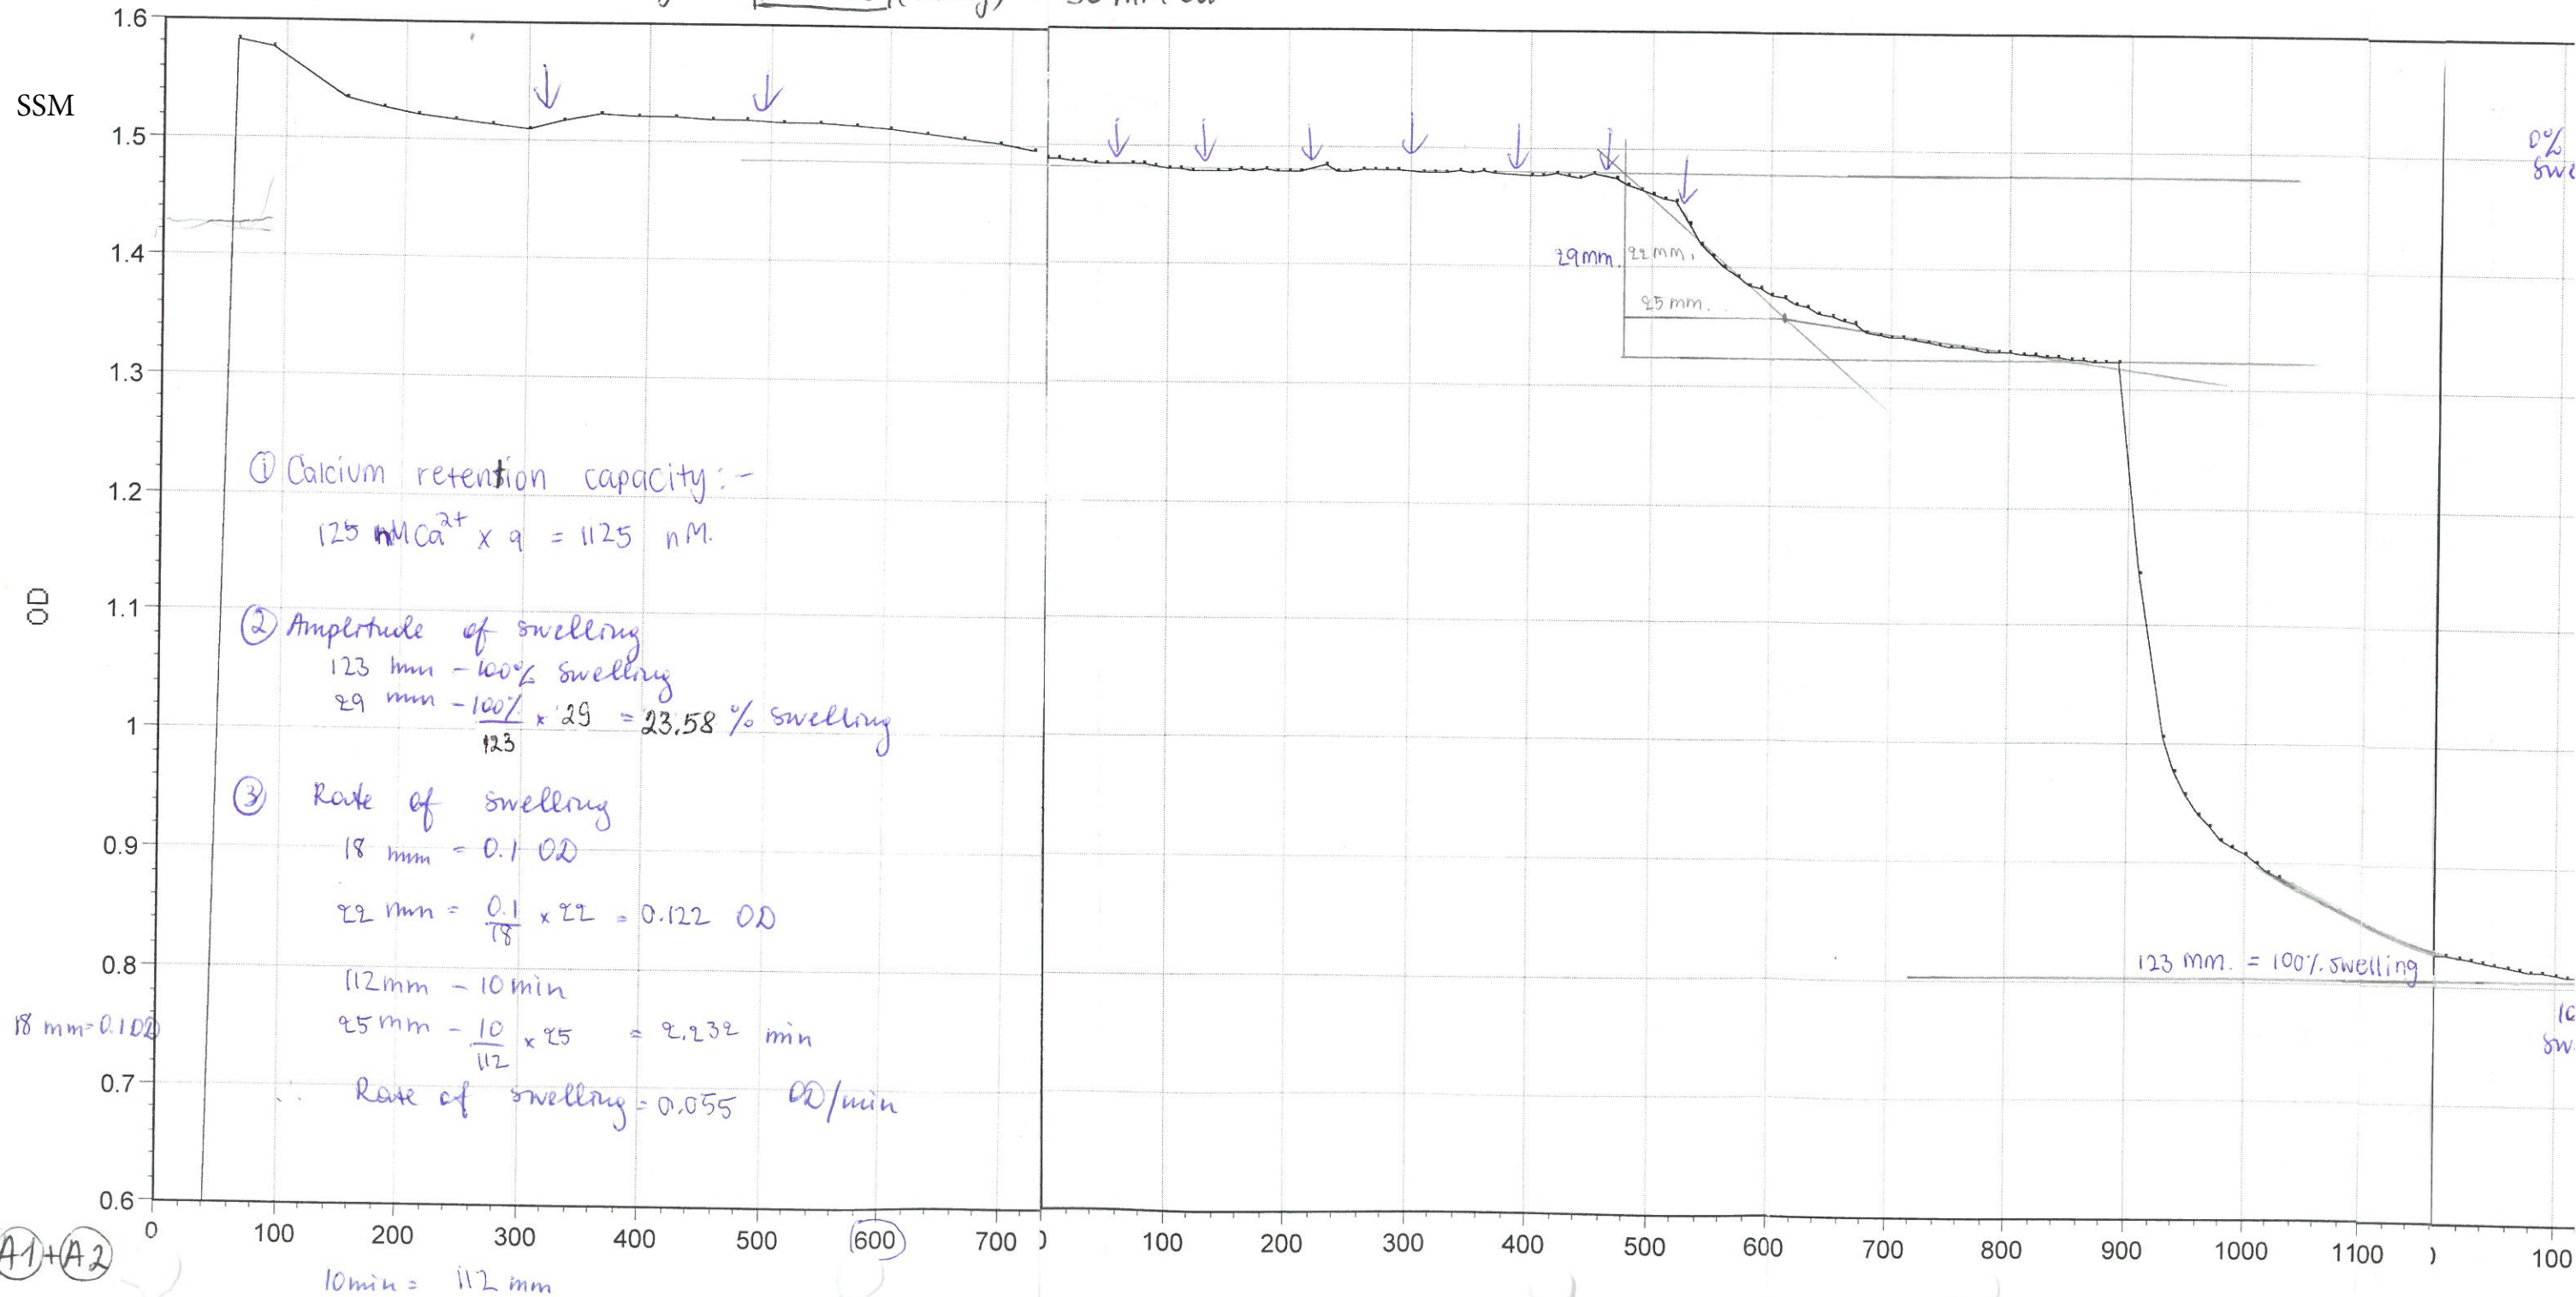

(A3)

ADP + Oligo + PKC $\epsilon$  inh (0.5  $\mu$ M)  
+ FGF2 (50 ng)using 50 mM Ca $^{2+}$   $\rightarrow$  125 nM Ca $^{2+}$  x3

Dec 7, 2007

SSM

OD

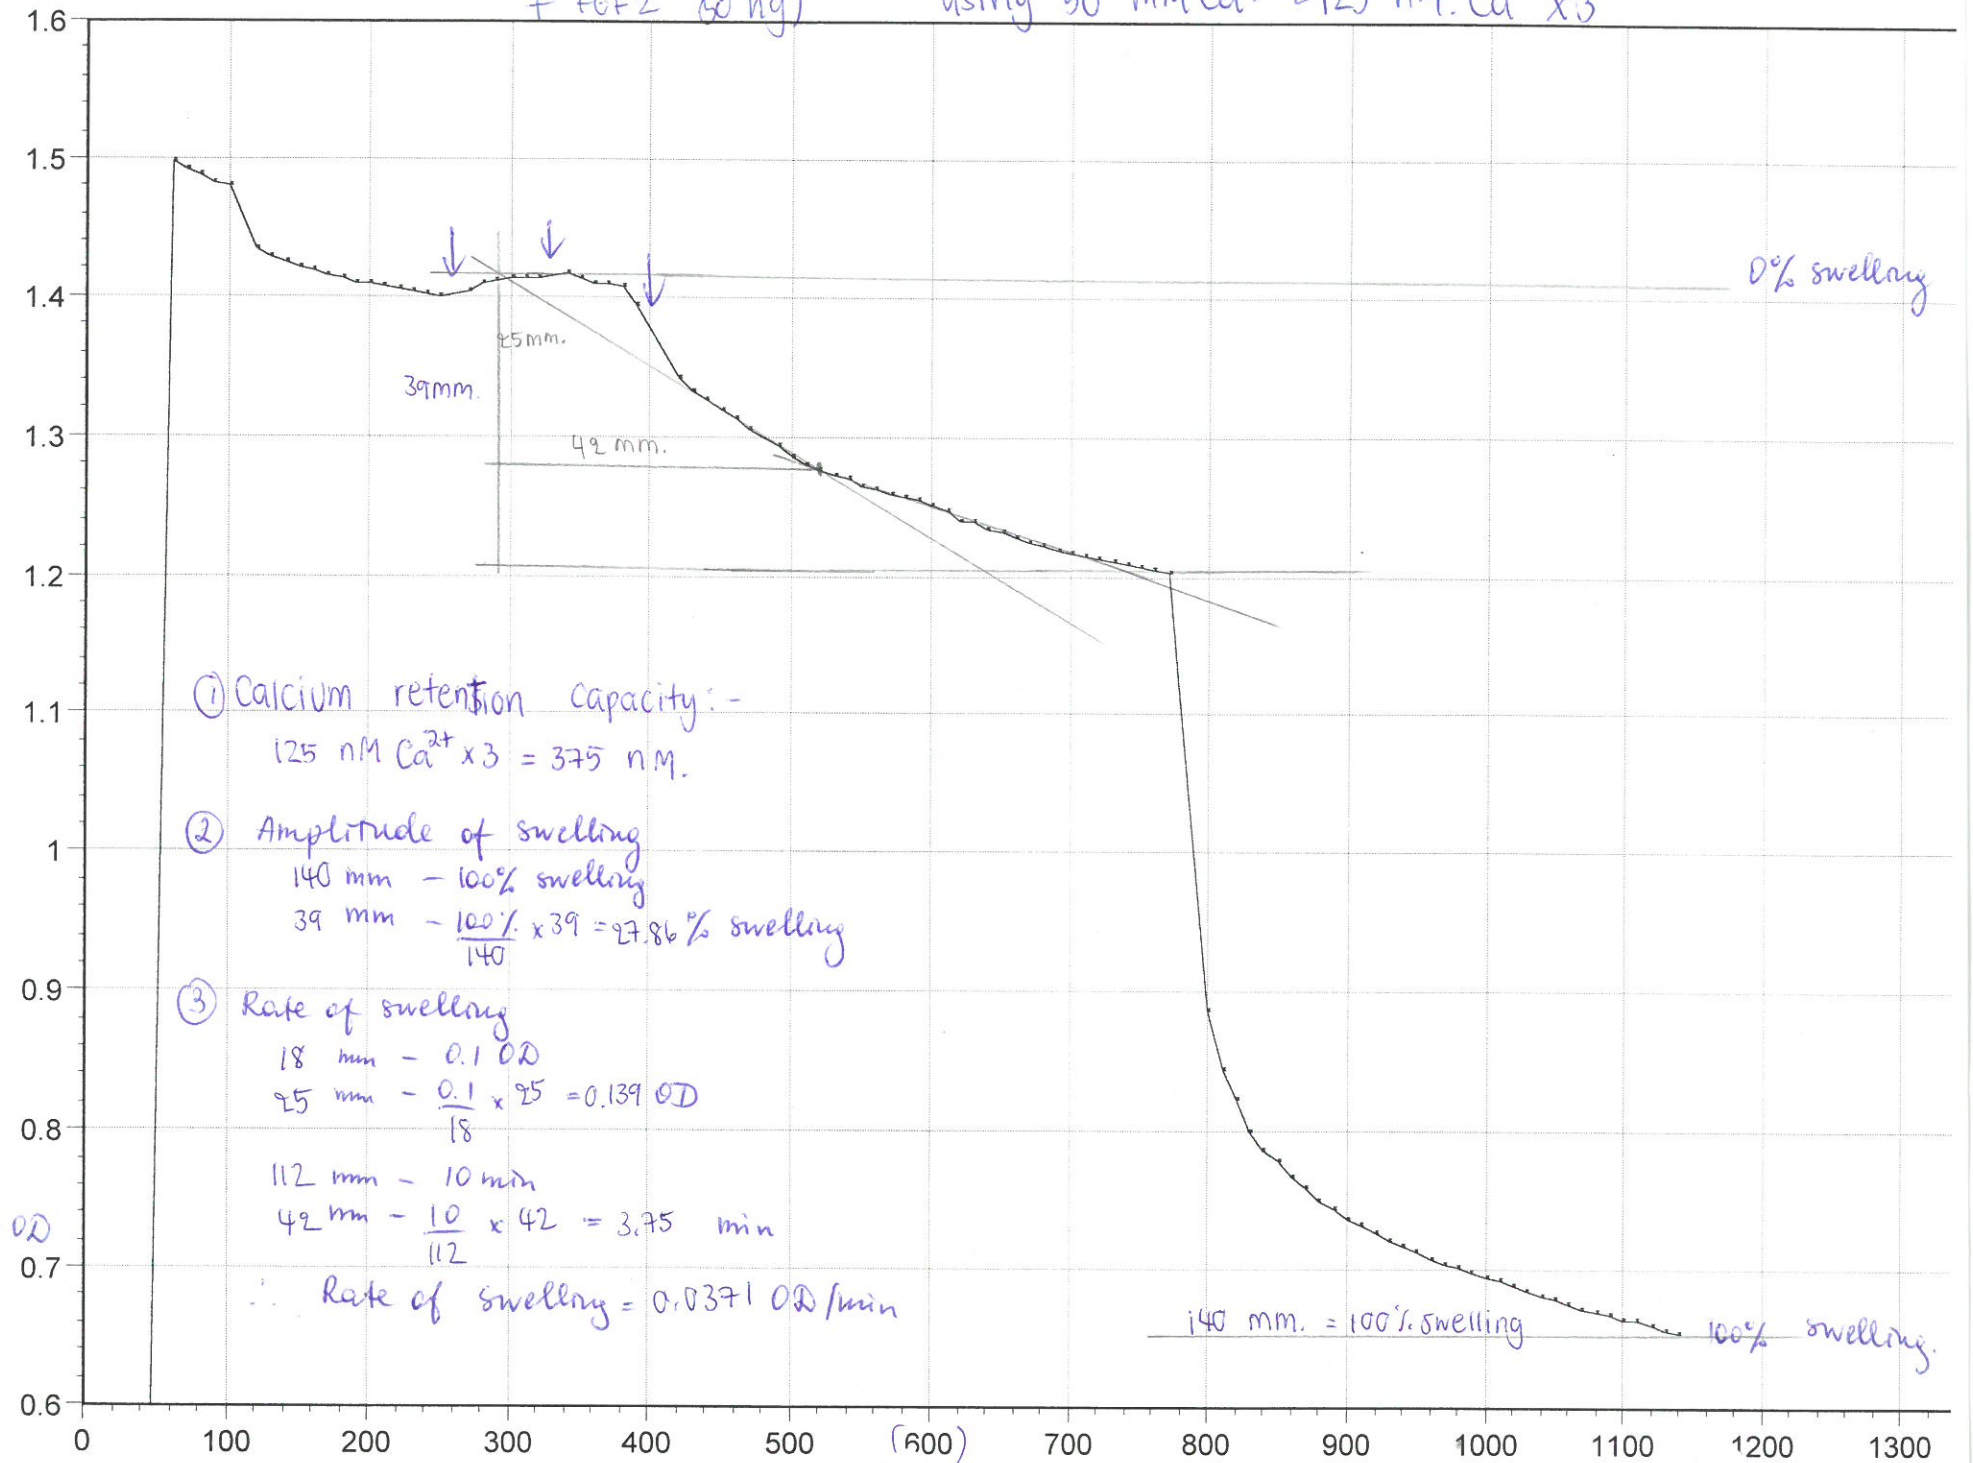

① Calcium retention capacity:-

$$125 \text{ nM Ca}^{2+} \times 3 = 375 \text{ nM.}$$

② Amplitude of swelling

$$140 \text{ mm} - 100\% \text{ swelling}$$

$$39 \text{ mm} - \frac{100\%}{140} \times 39 = 27.86\% \text{ swelling}$$

③ Rate of swelling

$$18 \text{ mm} - 0.1 \text{ OD}$$

$$25 \text{ mm} - \frac{0.1}{18} \times 25 = 0.139 \text{ OD}$$

$$112 \text{ mm} - 10 \text{ min}$$

$$42 \text{ mm} - \frac{10}{112} \times 42 = 3.75 \text{ min}$$

$$\therefore \text{Rate of swelling} = 0.0371 \text{ OD/min}$$

Deck 2, 2007

$+ \text{FCF}_2 + \text{ADP} + \text{Oligomycin} \rightarrow 50 \text{ mM Ca}^{2+}$

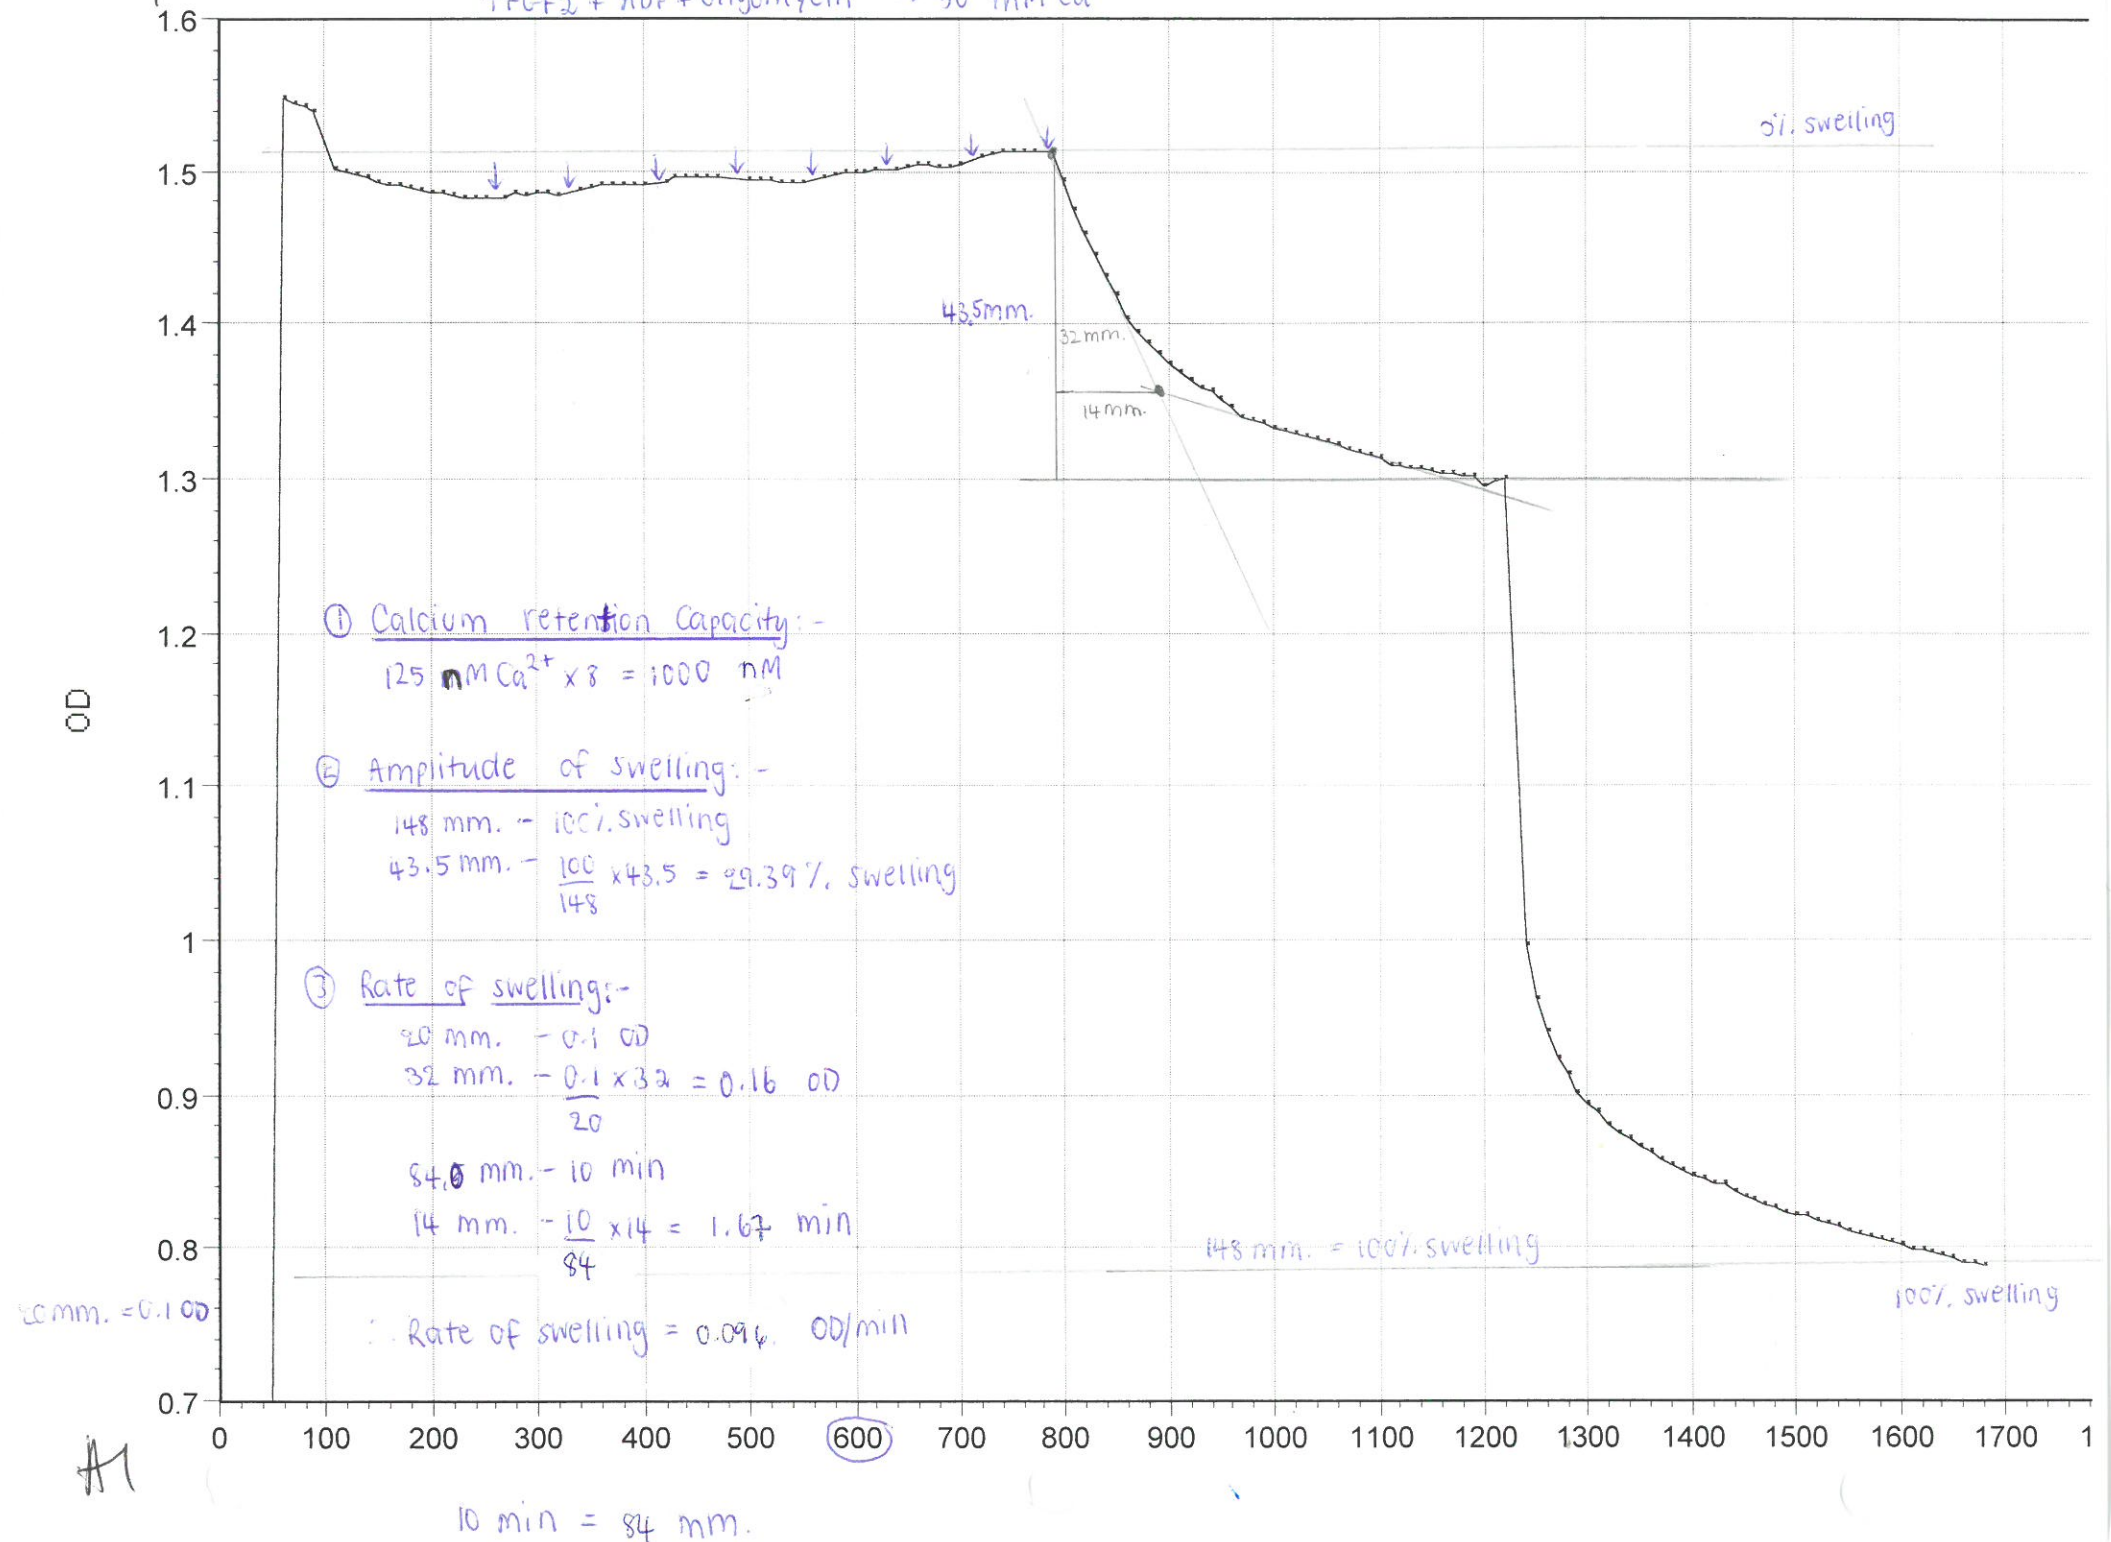



Dec 12, 2007

ADP + Oligomycin  $\left[ \begin{matrix} + \text{FGF2} \\ + \text{PKC}_{\text{inh.}} \end{matrix} \right] \rightarrow 50 \text{ mM Ca}^{2+}$

SSM

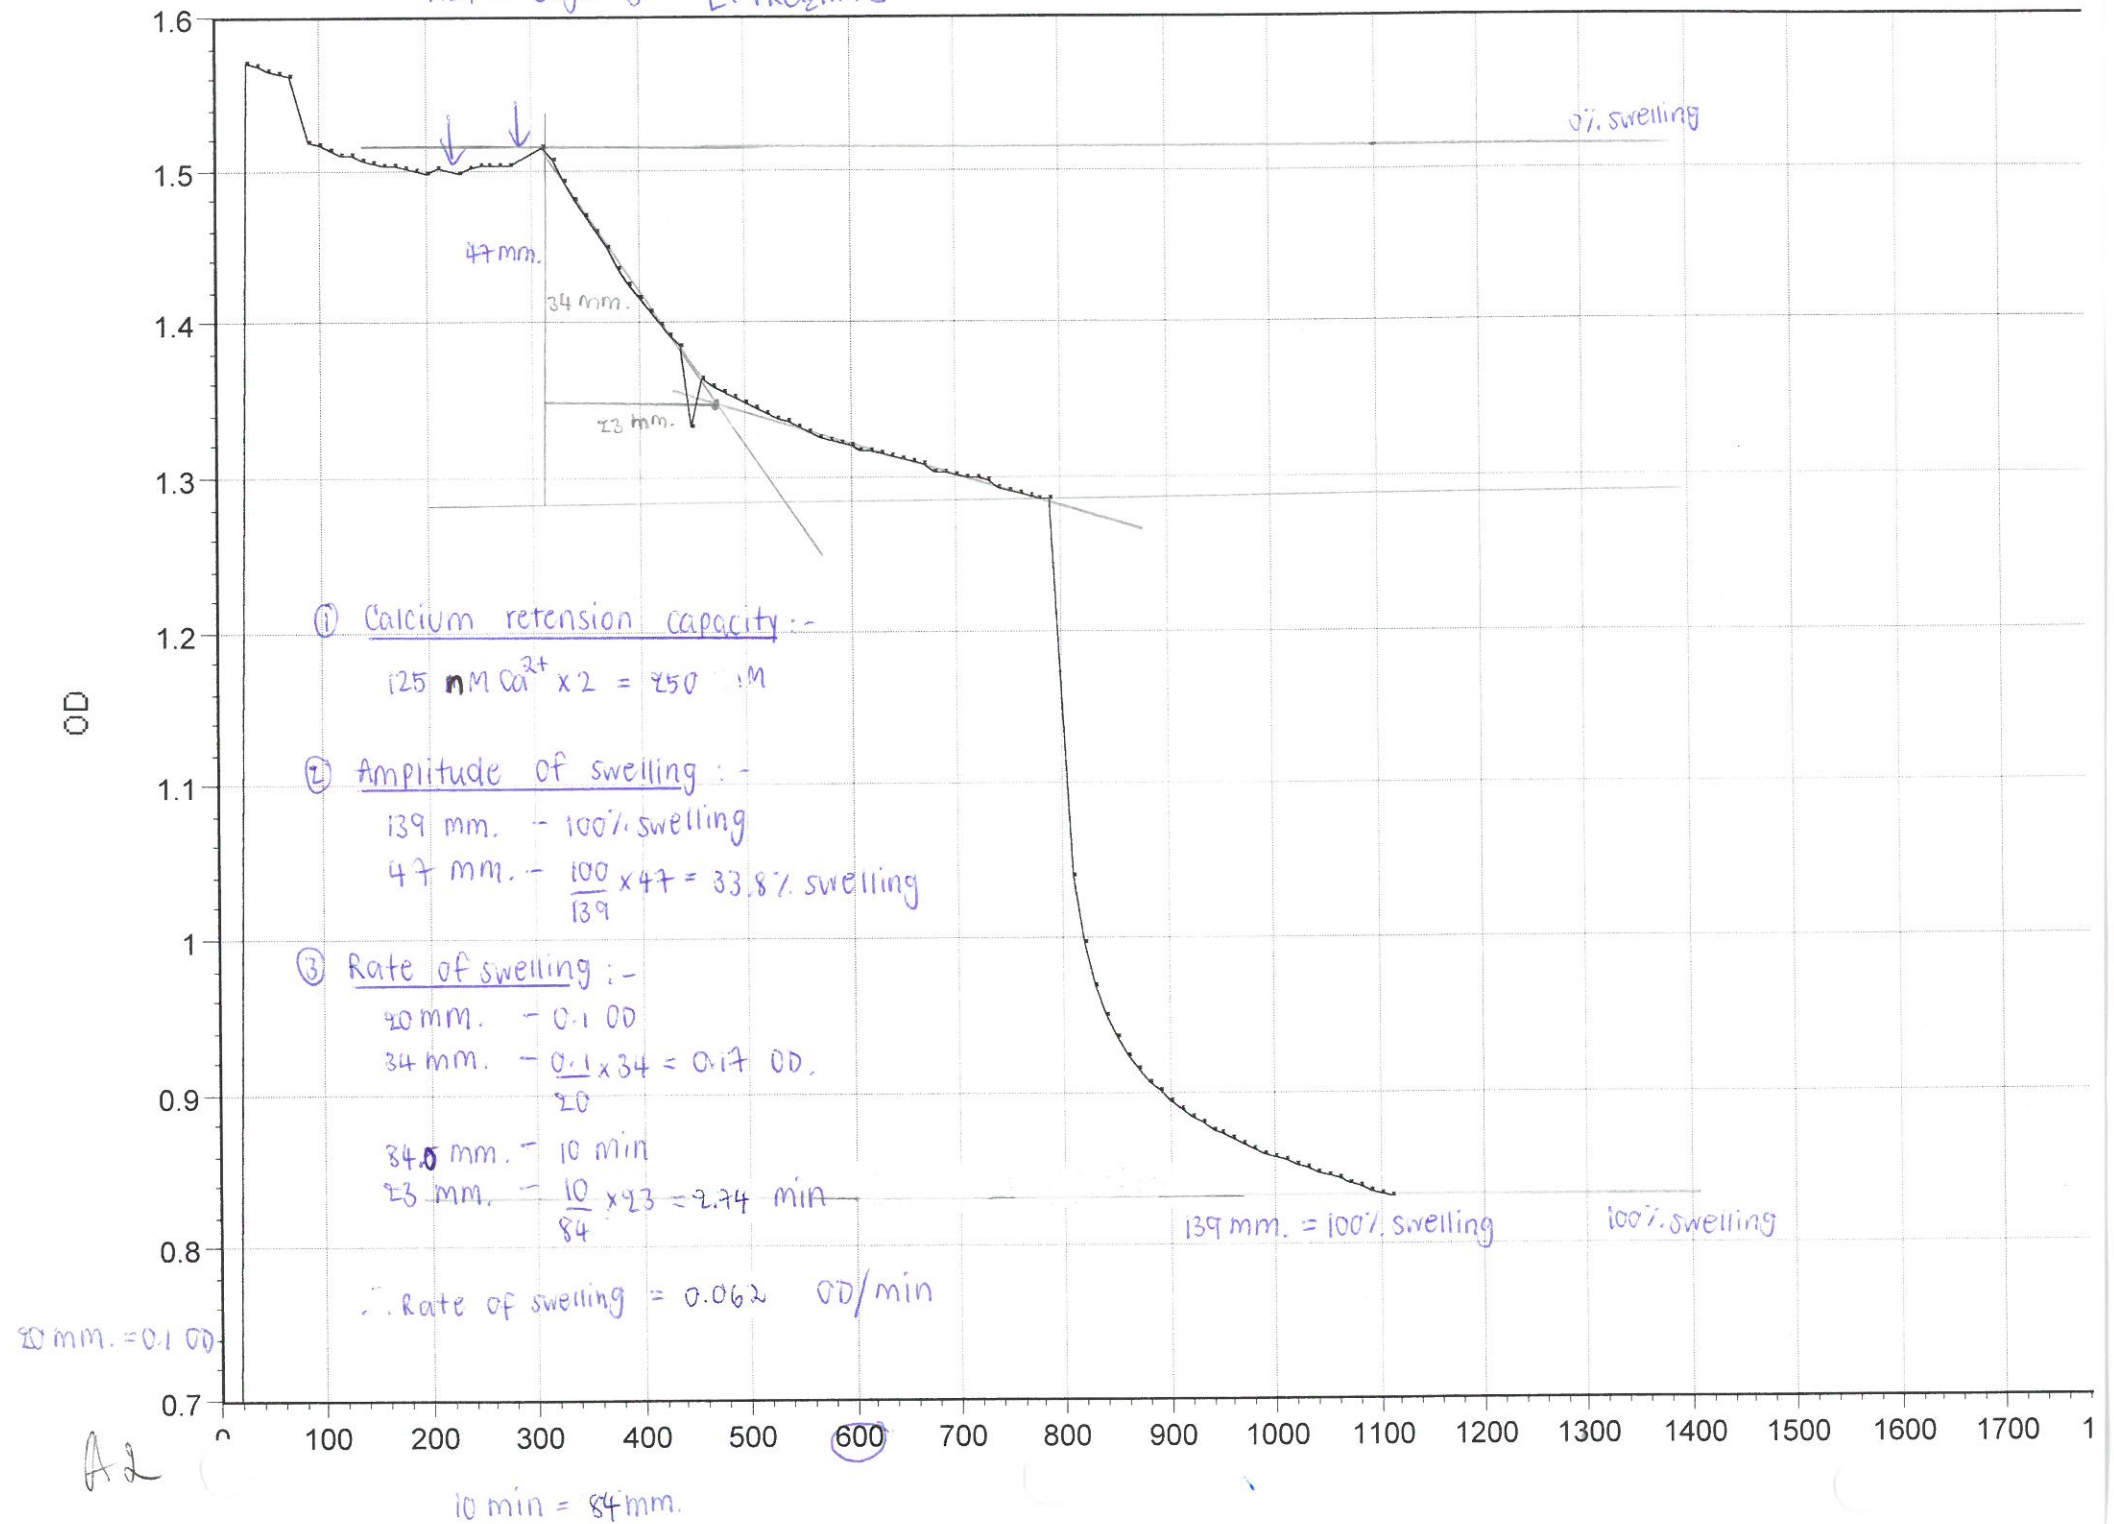

Dec 12, 2007

ADP + C<sub>12</sub> mycin. → 50 mM Ca<sup>2+</sup> NO FGF2 + NO PKC<sub>ε</sub> inh.

SSM

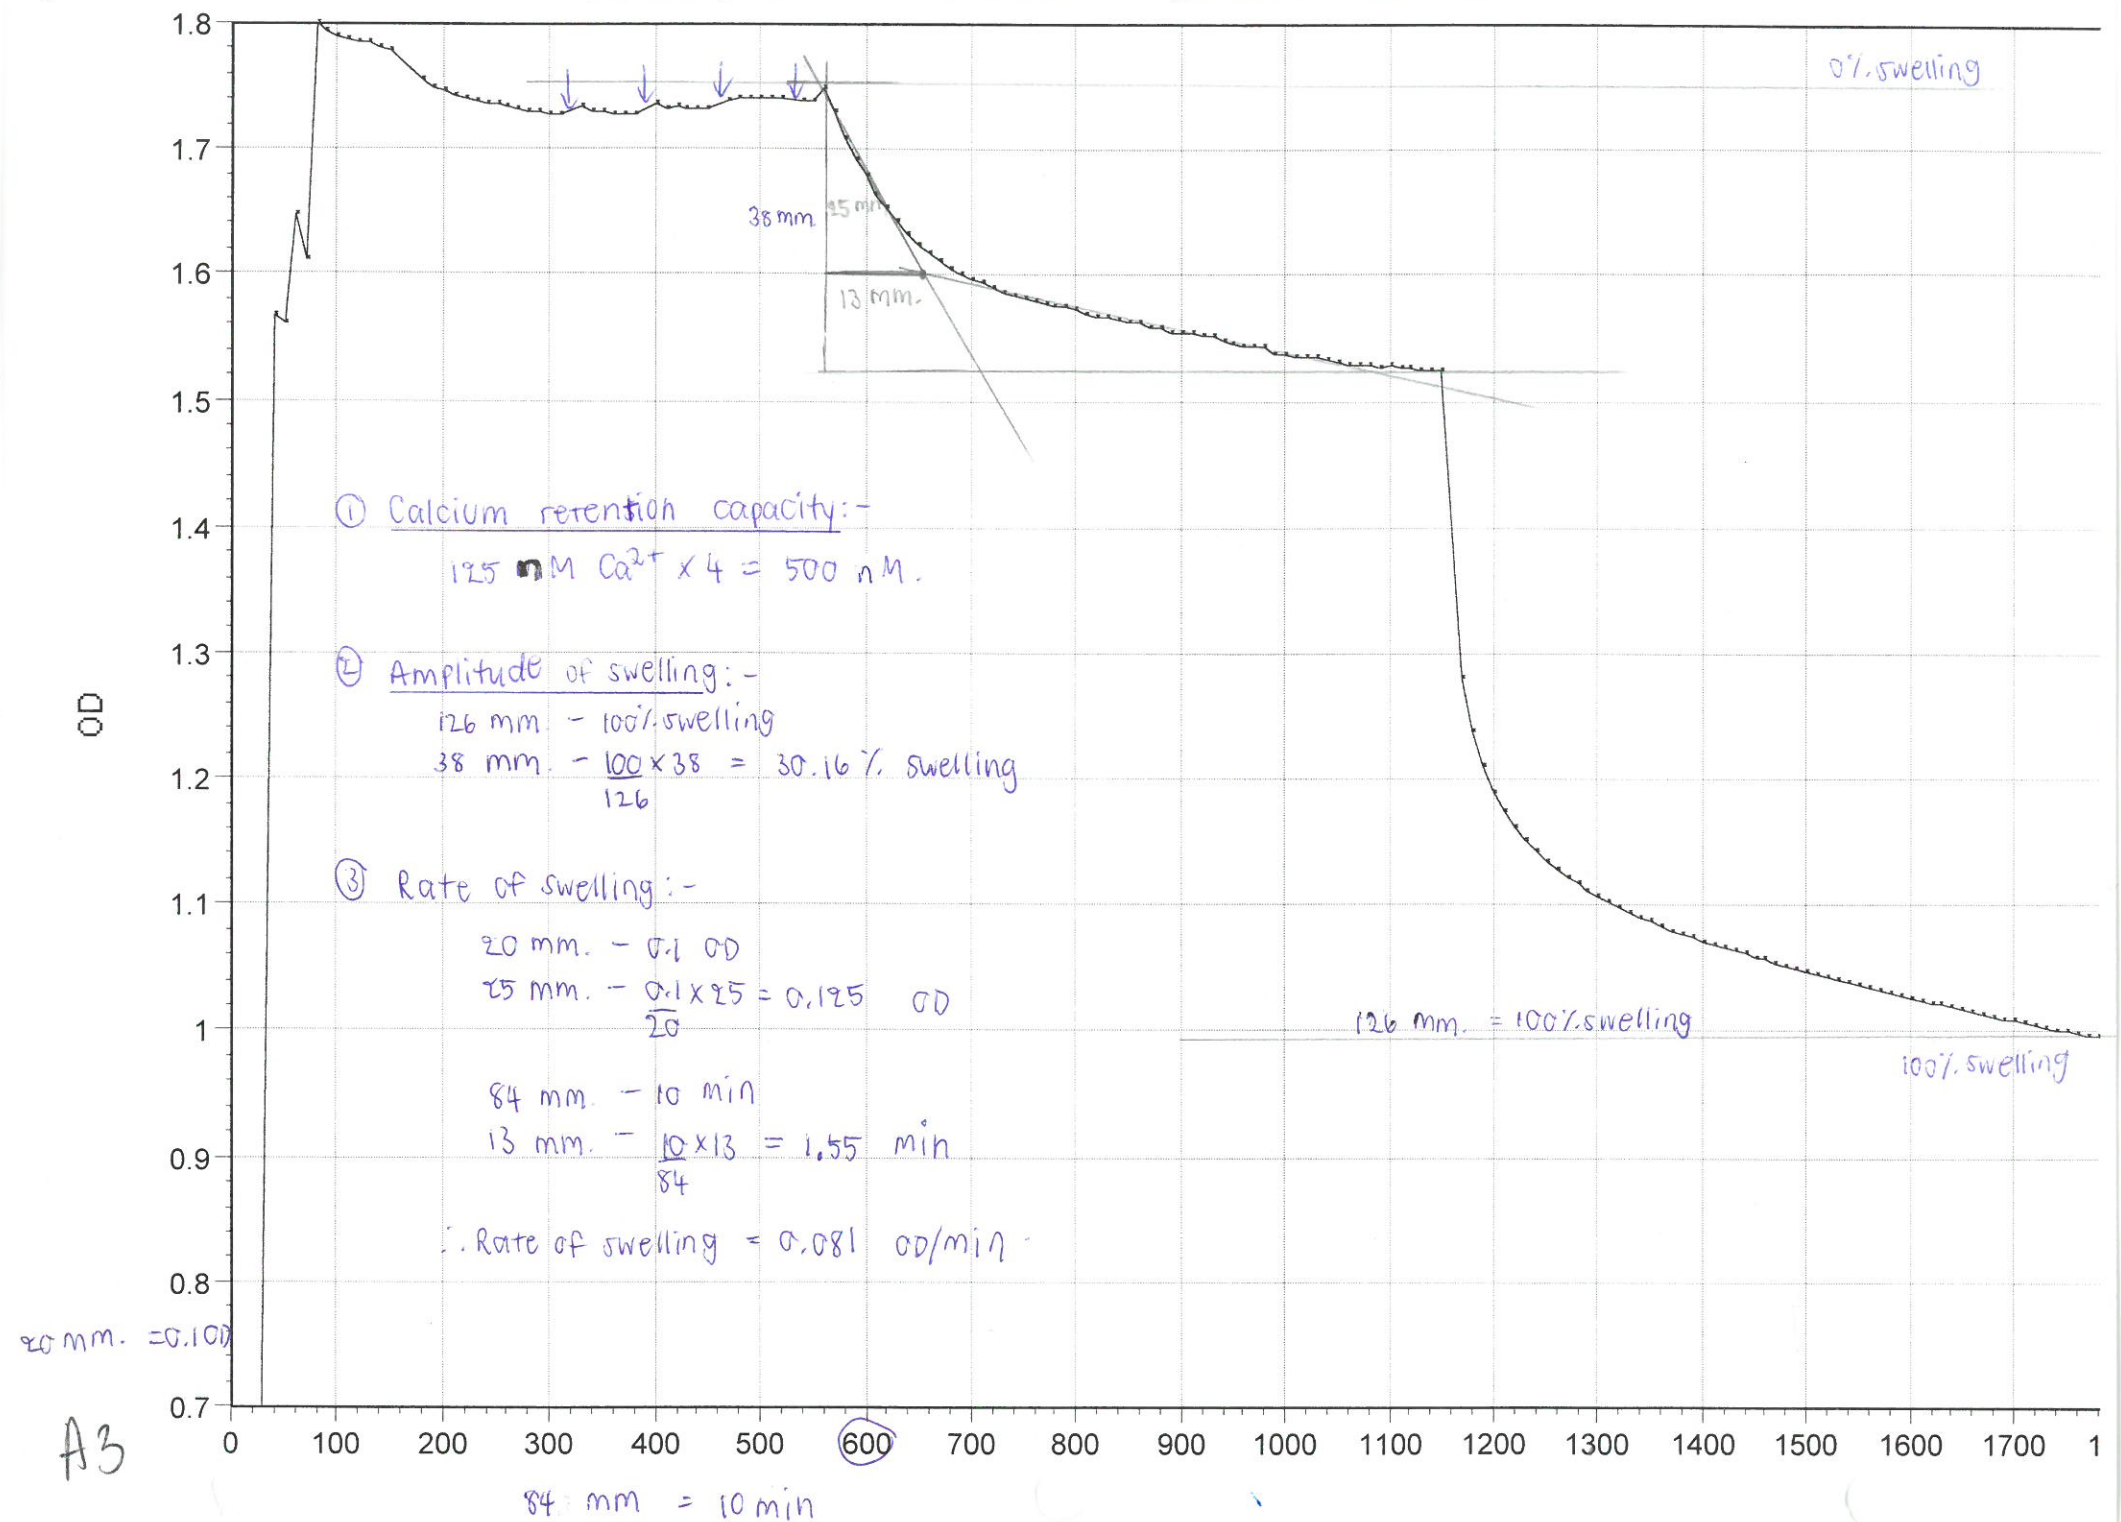

Dec 14, 2007

ADP + olig +  $\boxed{\text{FGF-2} + \text{CsA}}$   $\rightarrow 500 \text{ mM Ca}^{2+}$ 

Dec 14, 2007

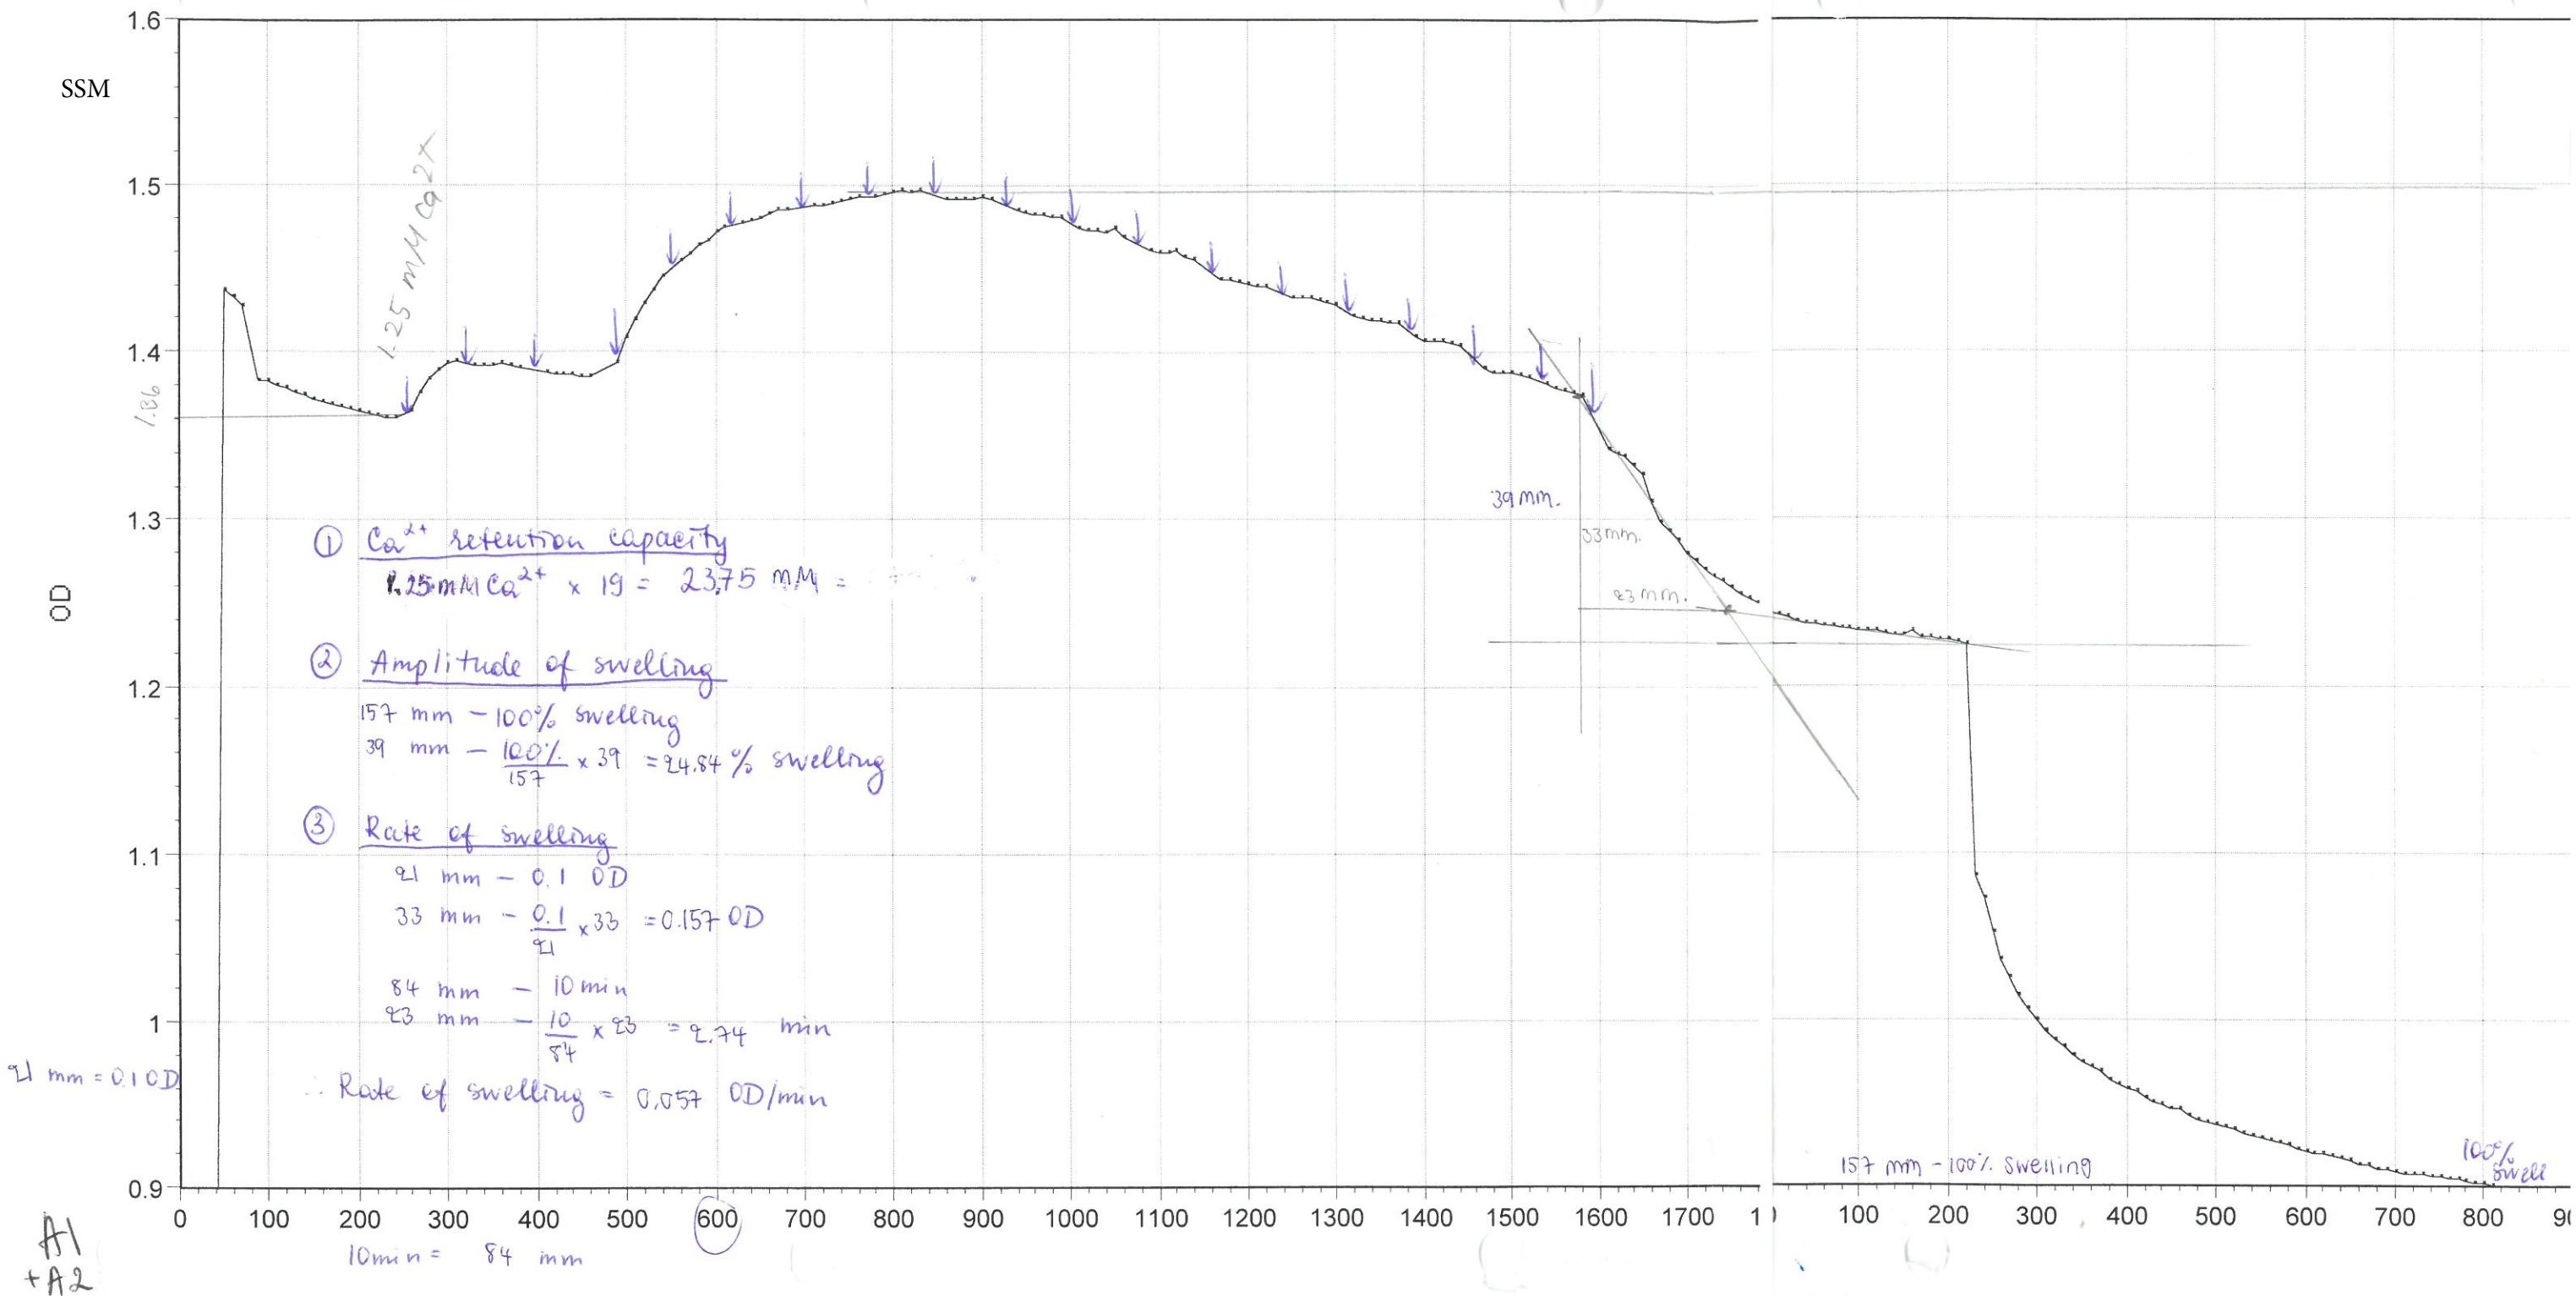



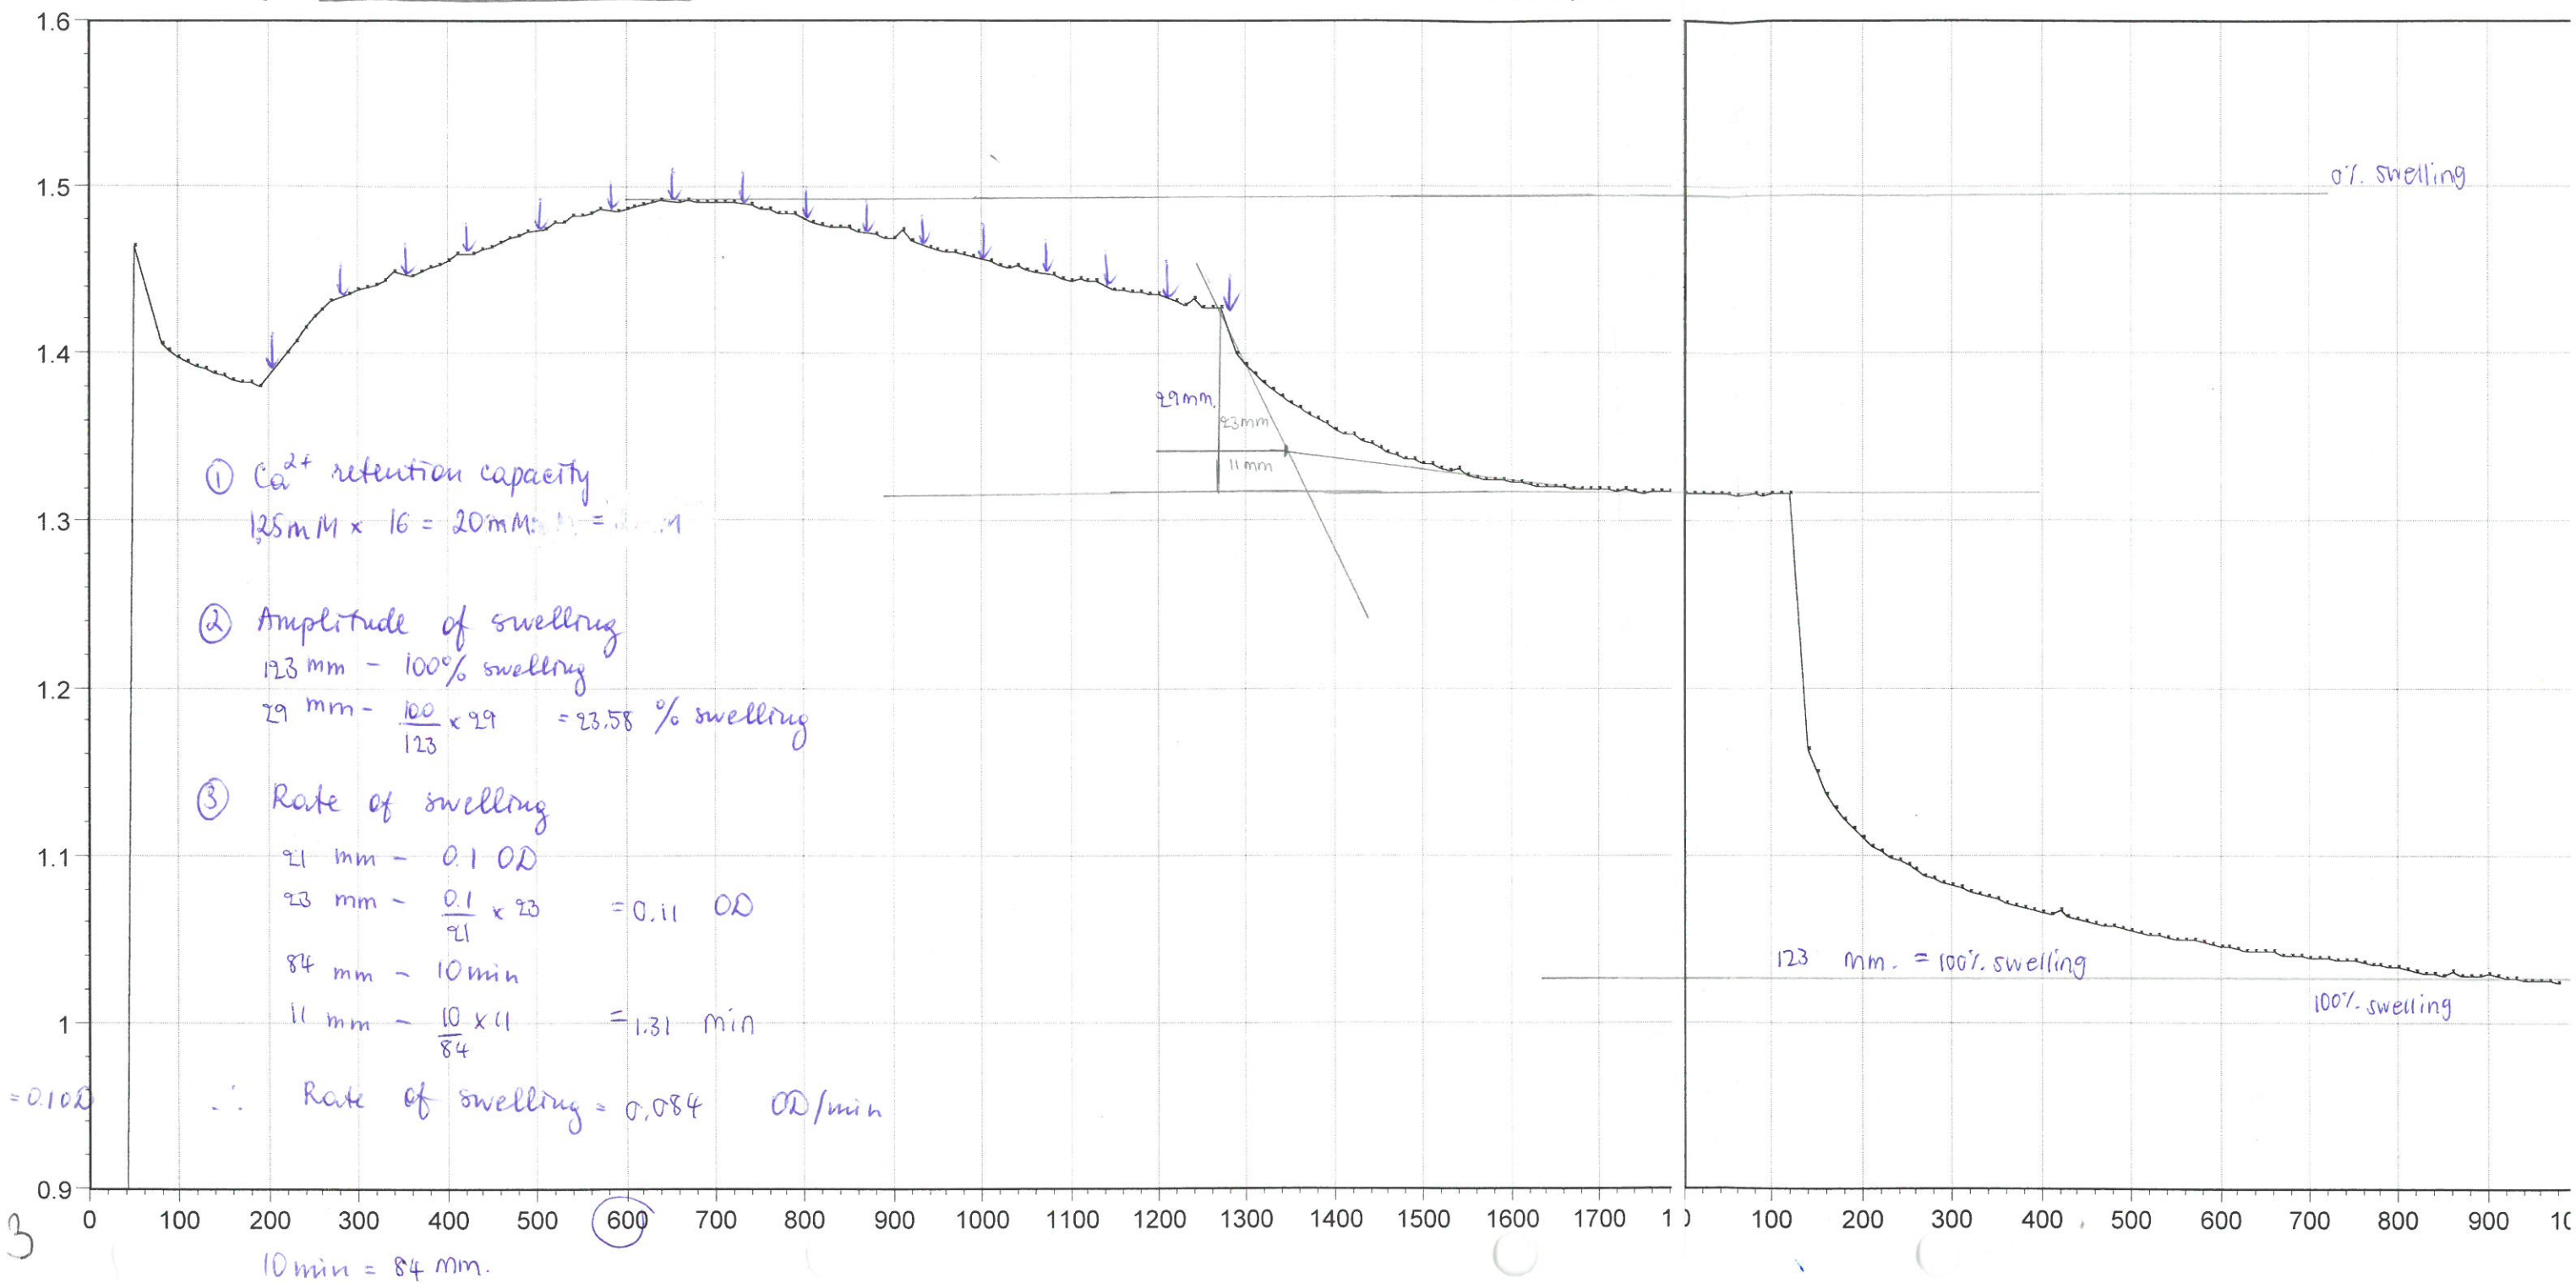

SSM

ATP + oligomycin  $\rightarrow$  50 mM  $\text{Ca}^{2+}$

DEC 14, 2007

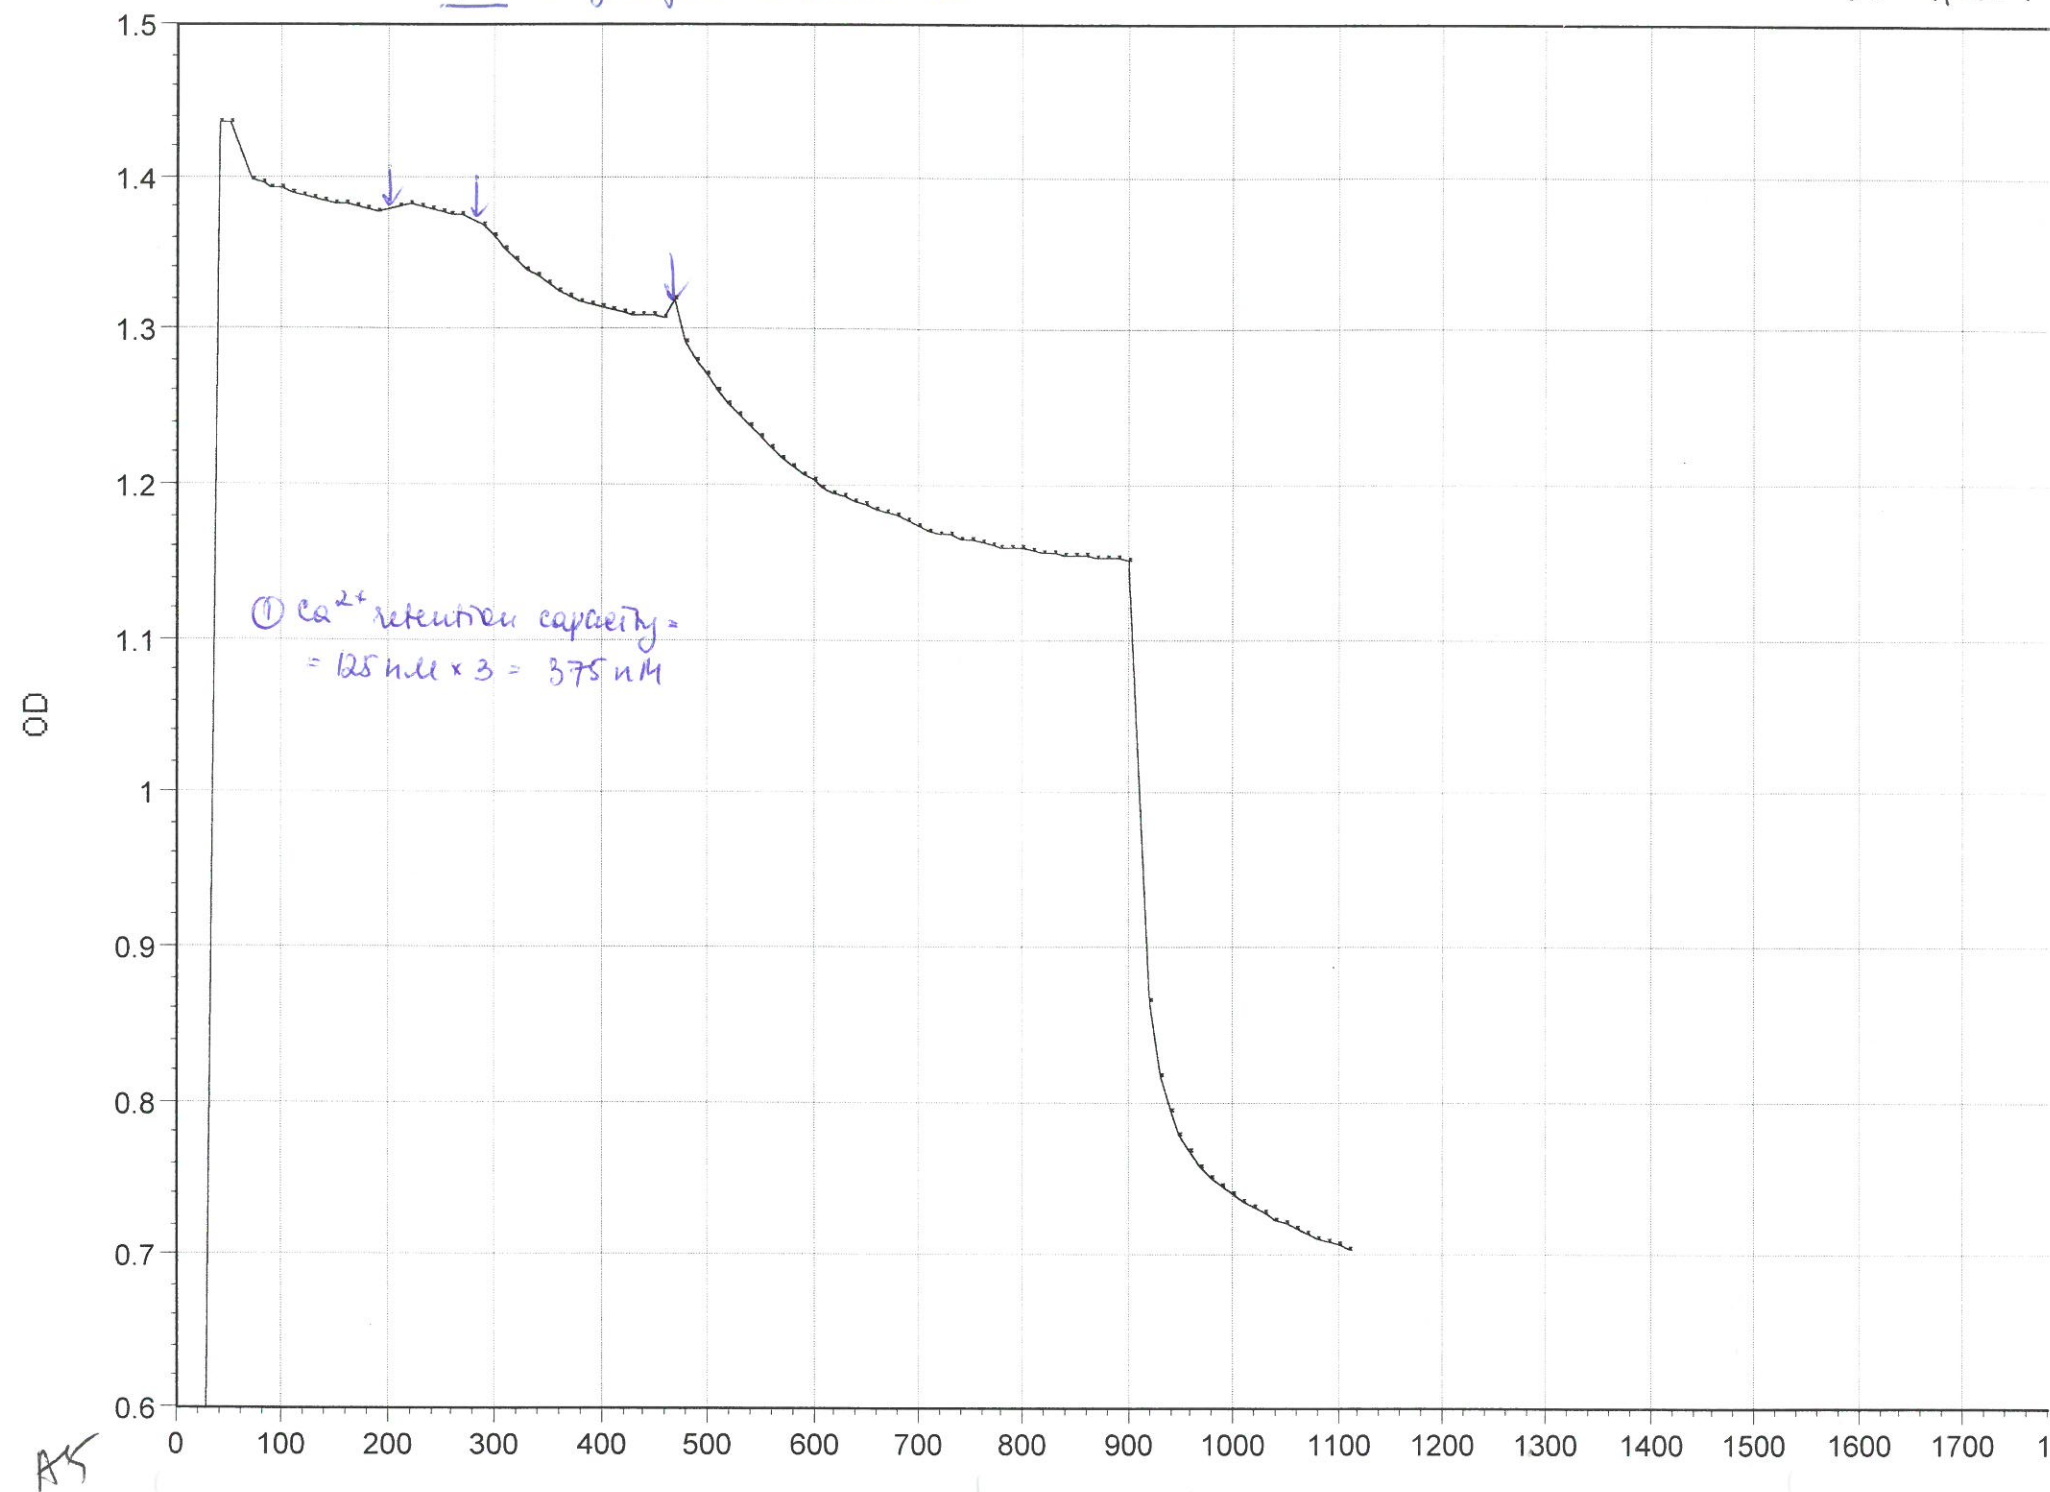



ATP + olig + FGF2  $\rightarrow$  50 mM  $\text{Ca}^{2+}$

Dec 14, 2007

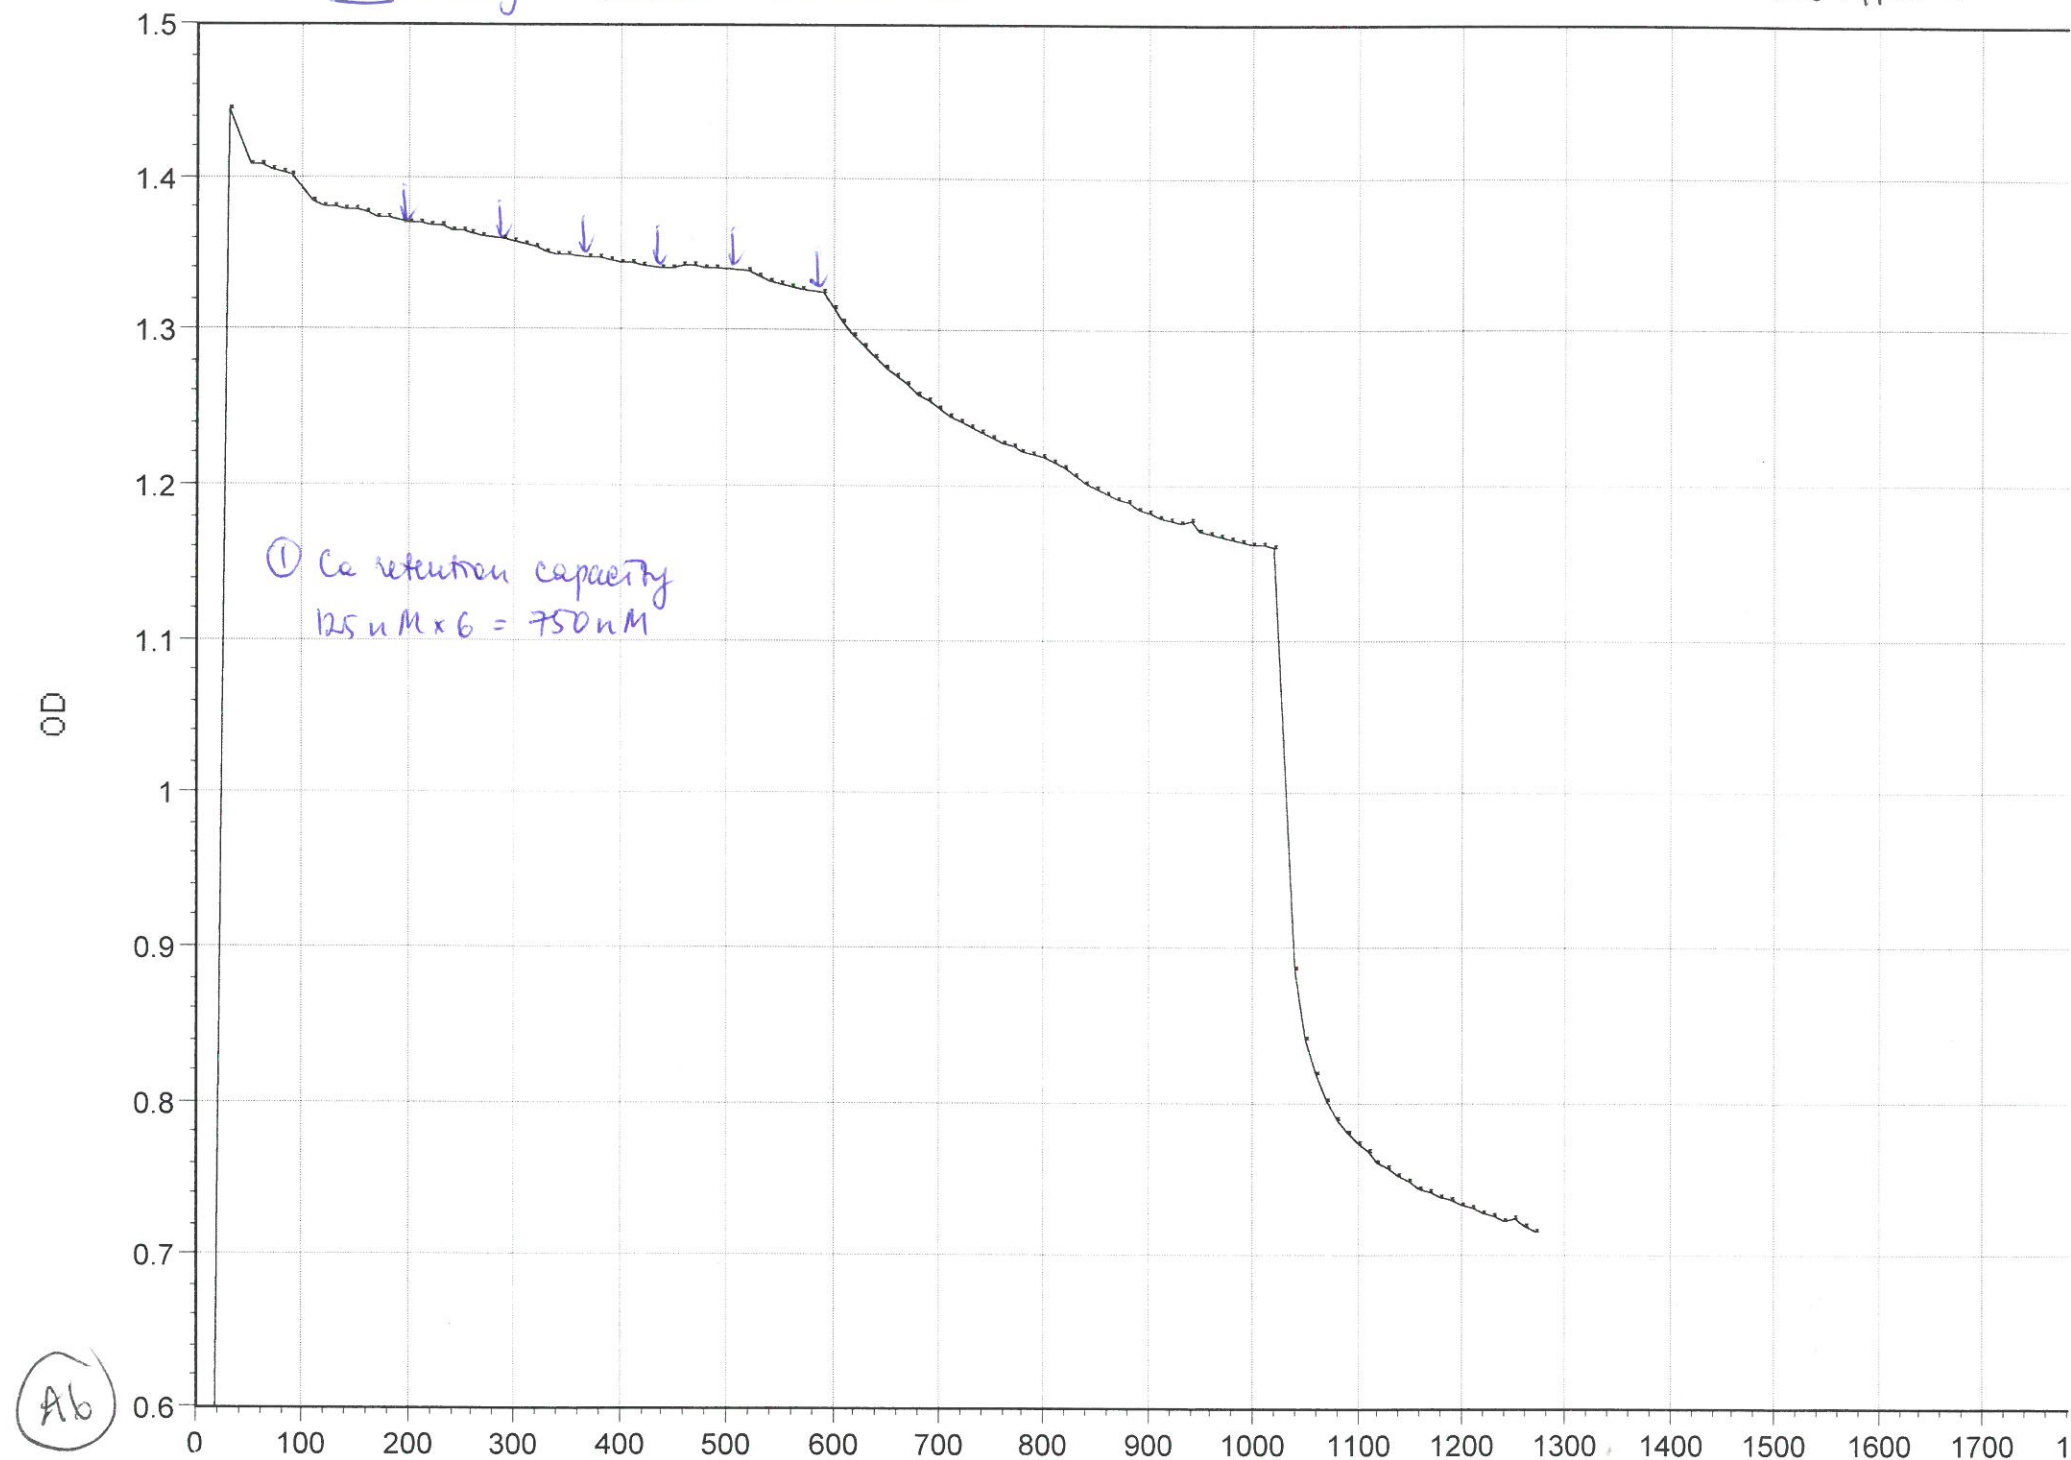

ATP + olig + FGF-2 + PKCinh.

Dec 14, 2007

SSM

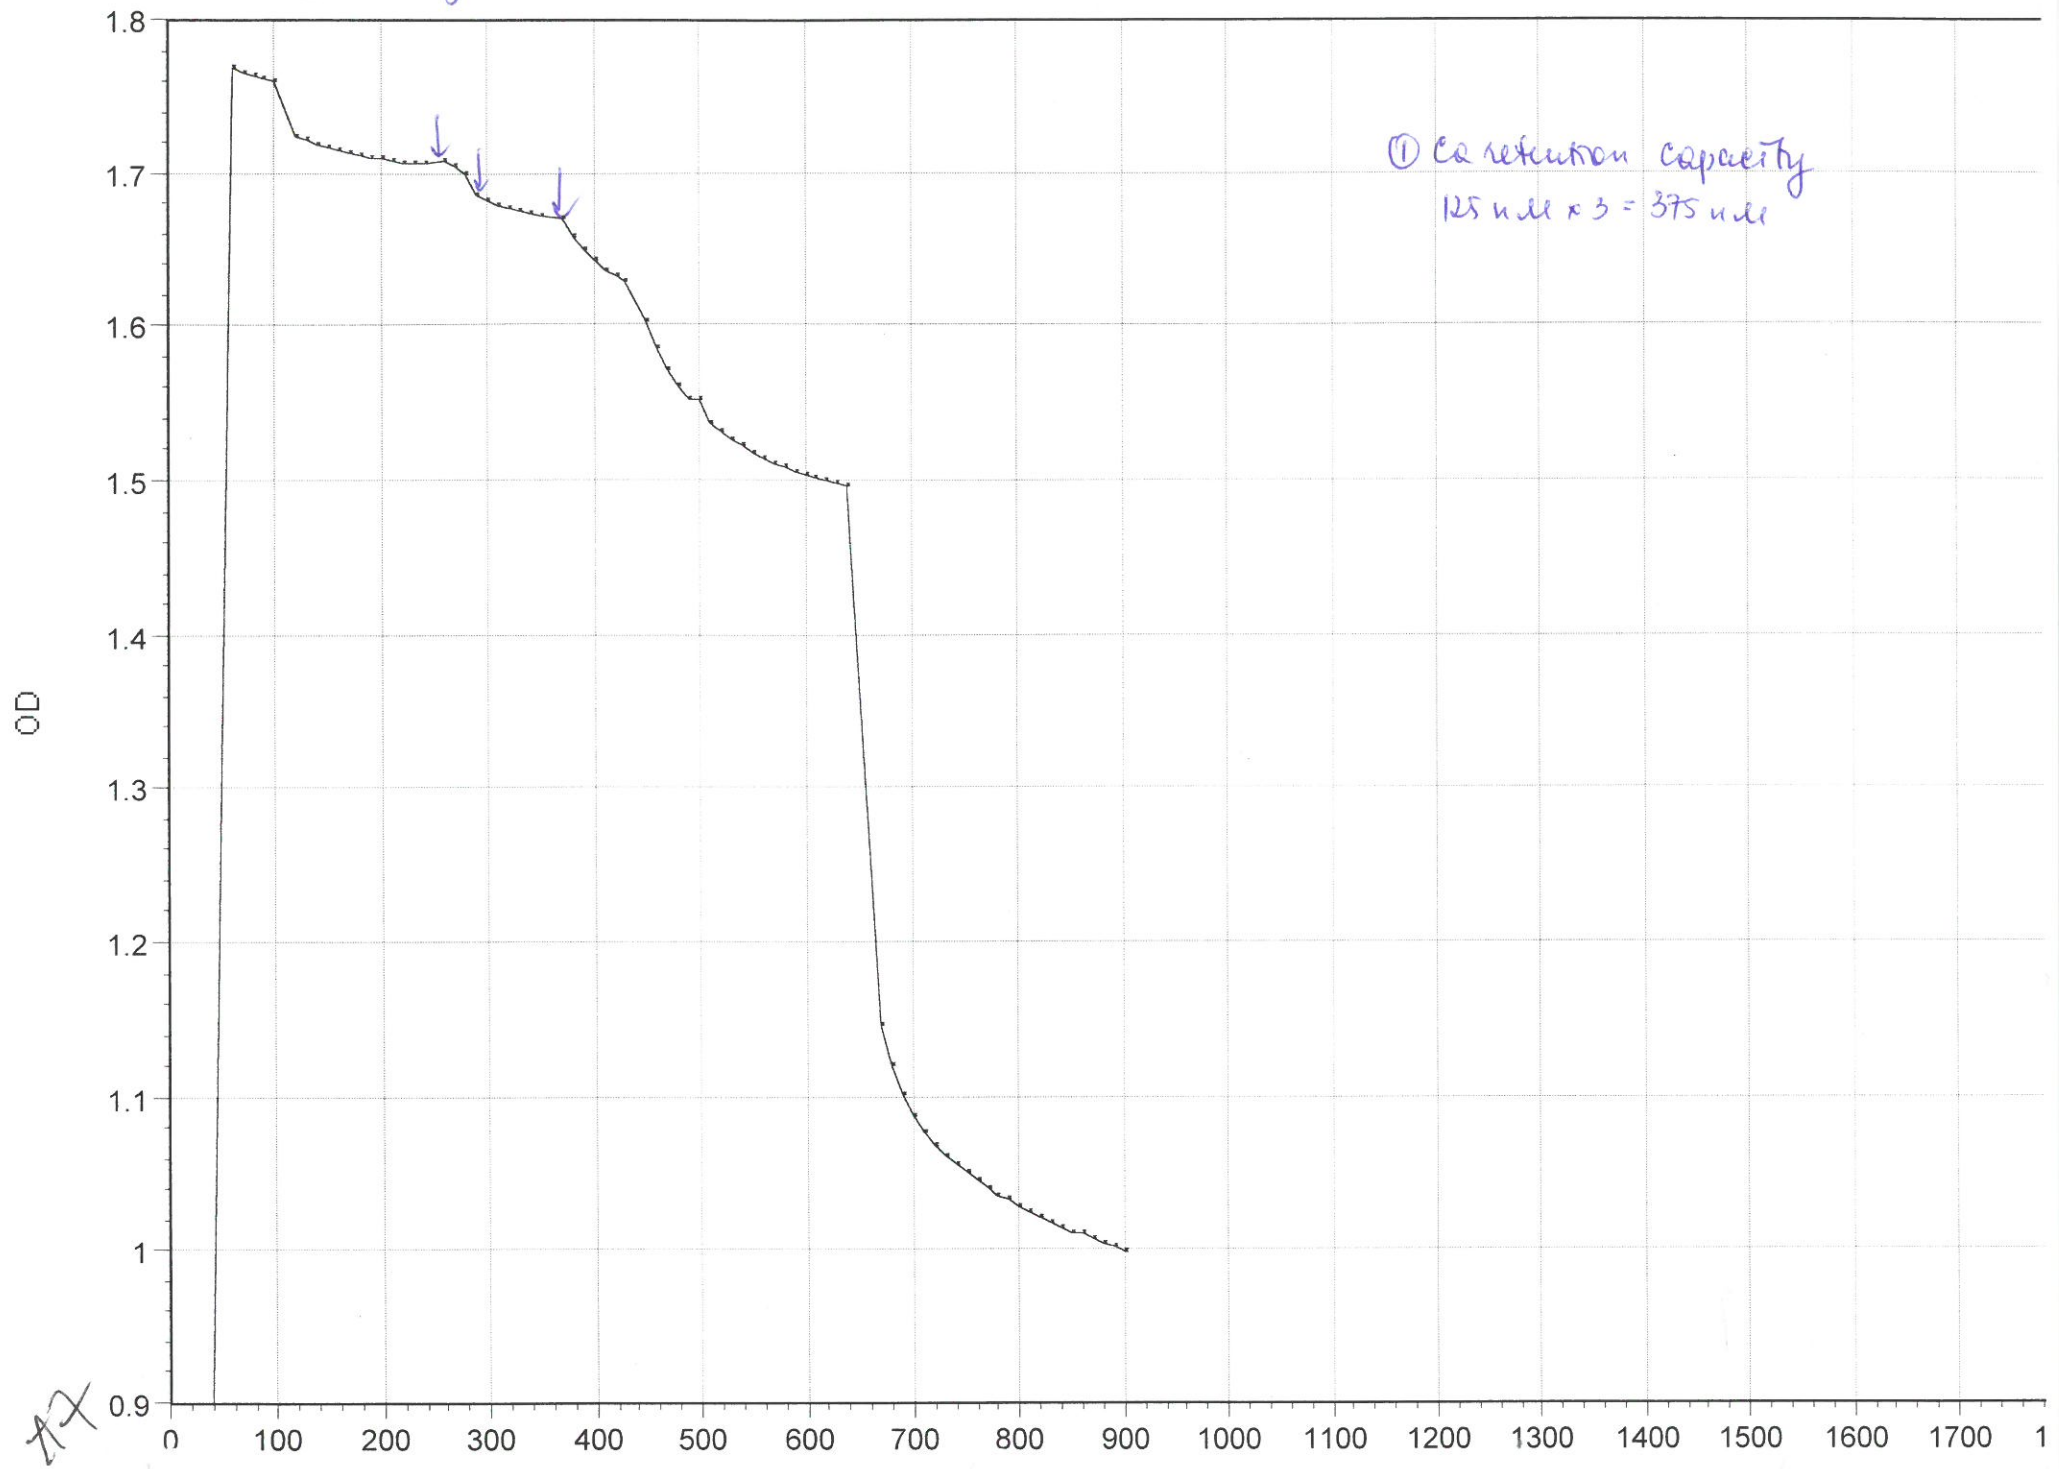

17

10 min = 83 mm.

SSM

• FGF2 + PKC $\epsilon$  inhibitor  
ADP + Oligomycin +  $\text{Ca}^{2+}$

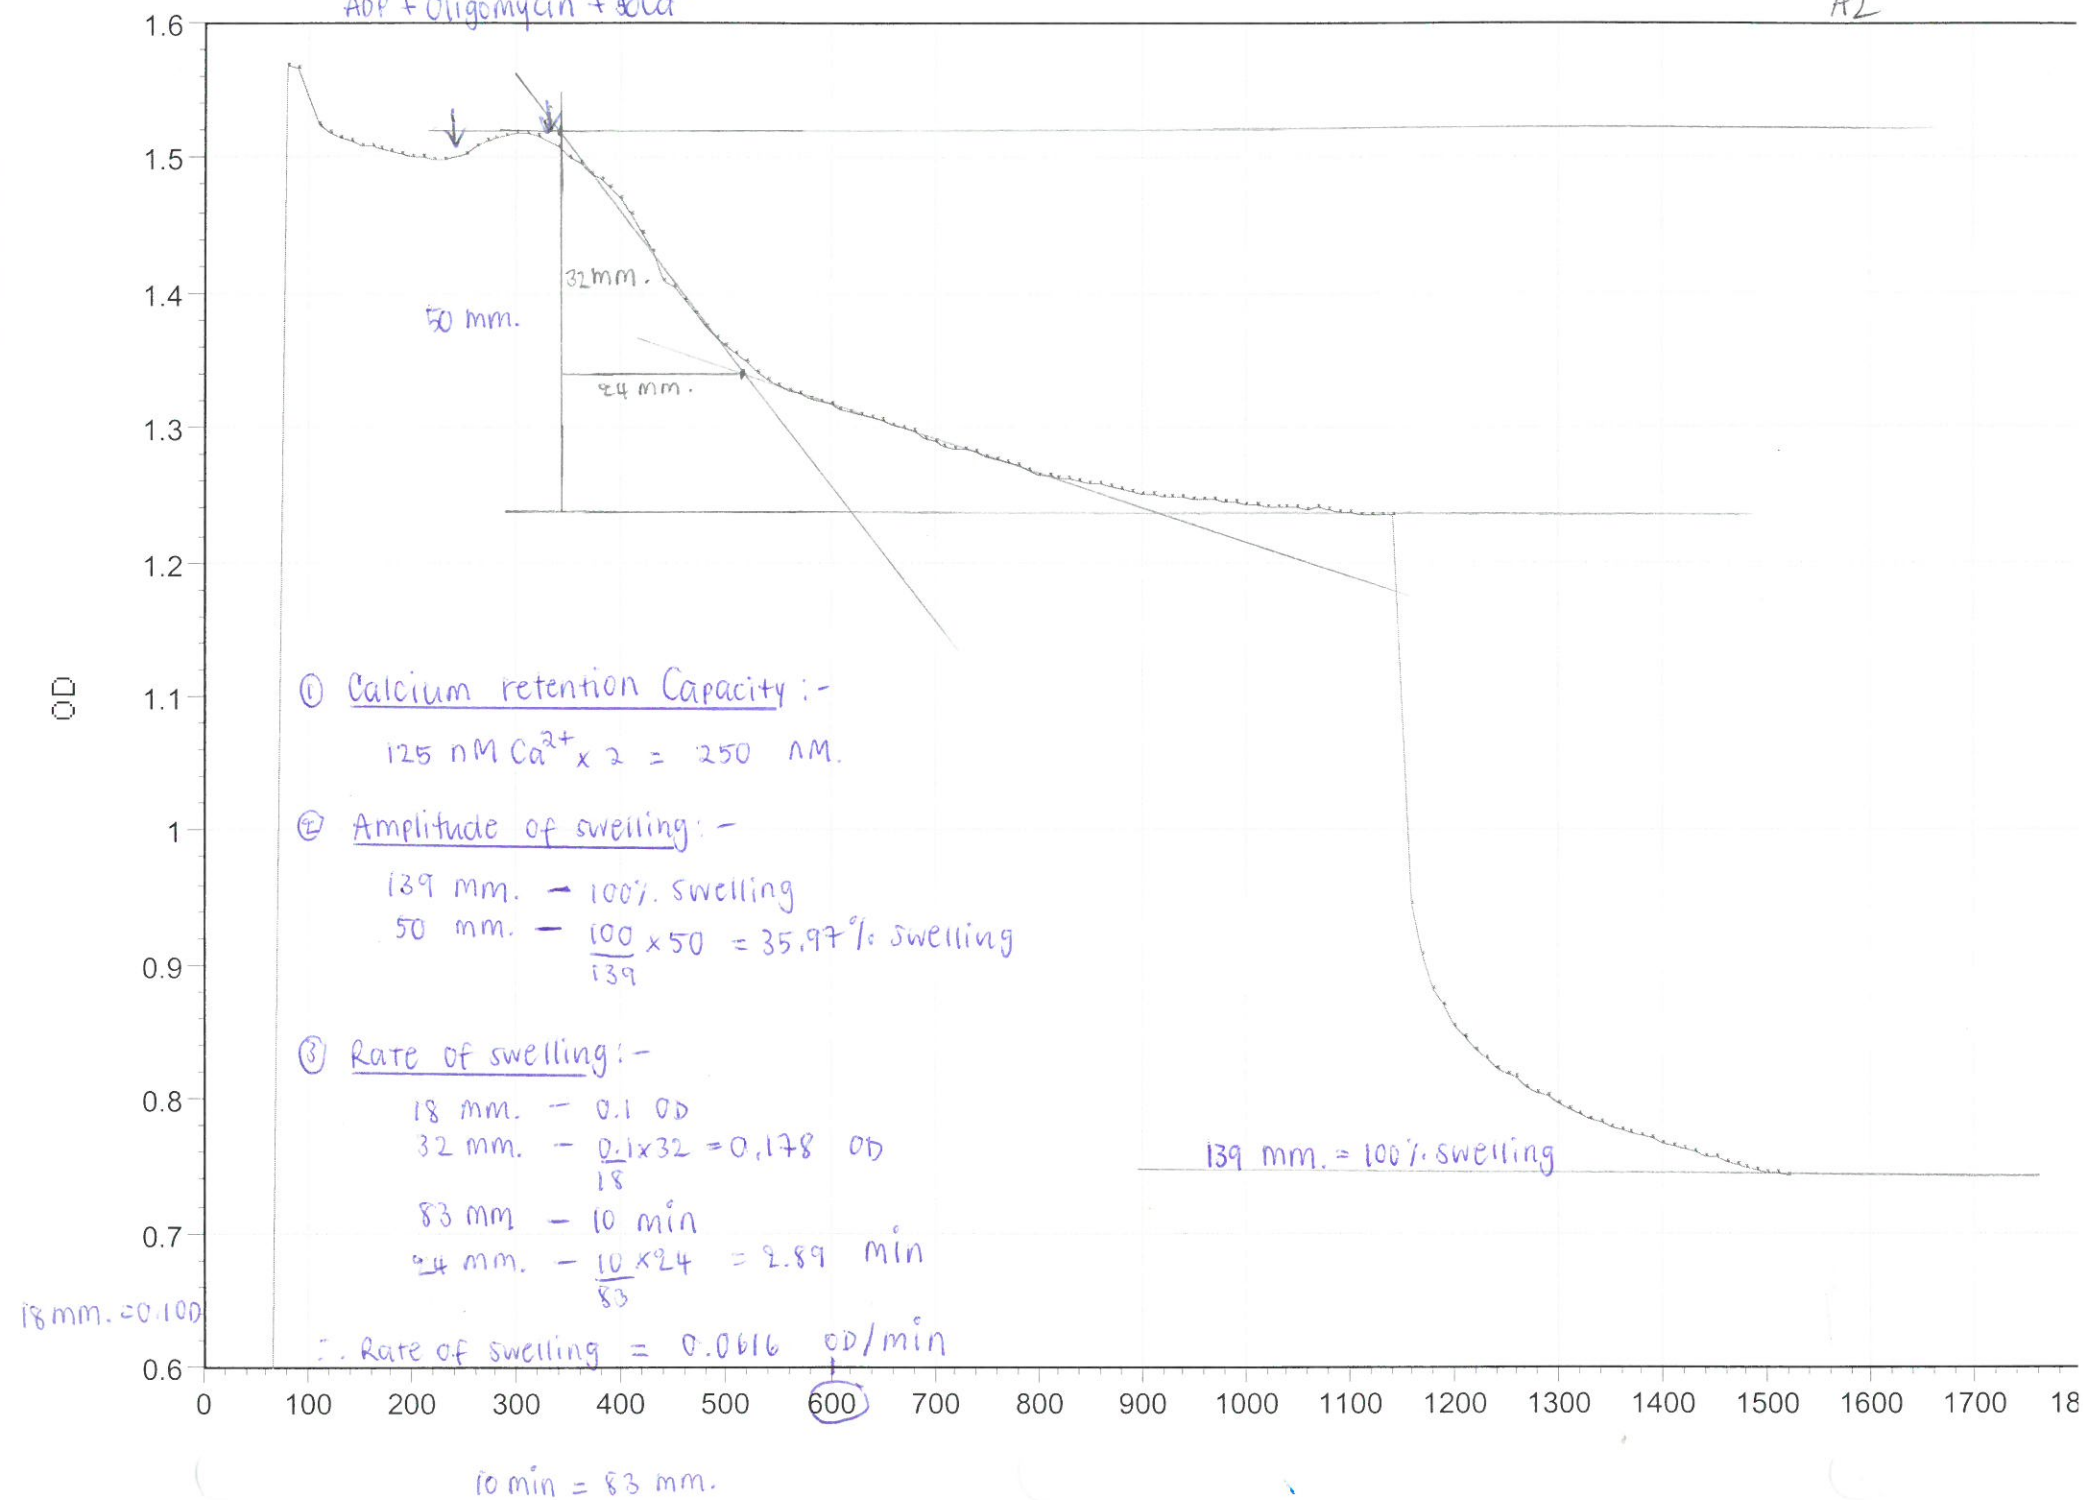



• FGF2 + PKC $\epsilon$  scramble  
ADP + Oligomycin + 50 Ca $^{2+}$

A3  
Jan 15, 2008

SSM

OD

18 mm. = 0.100.

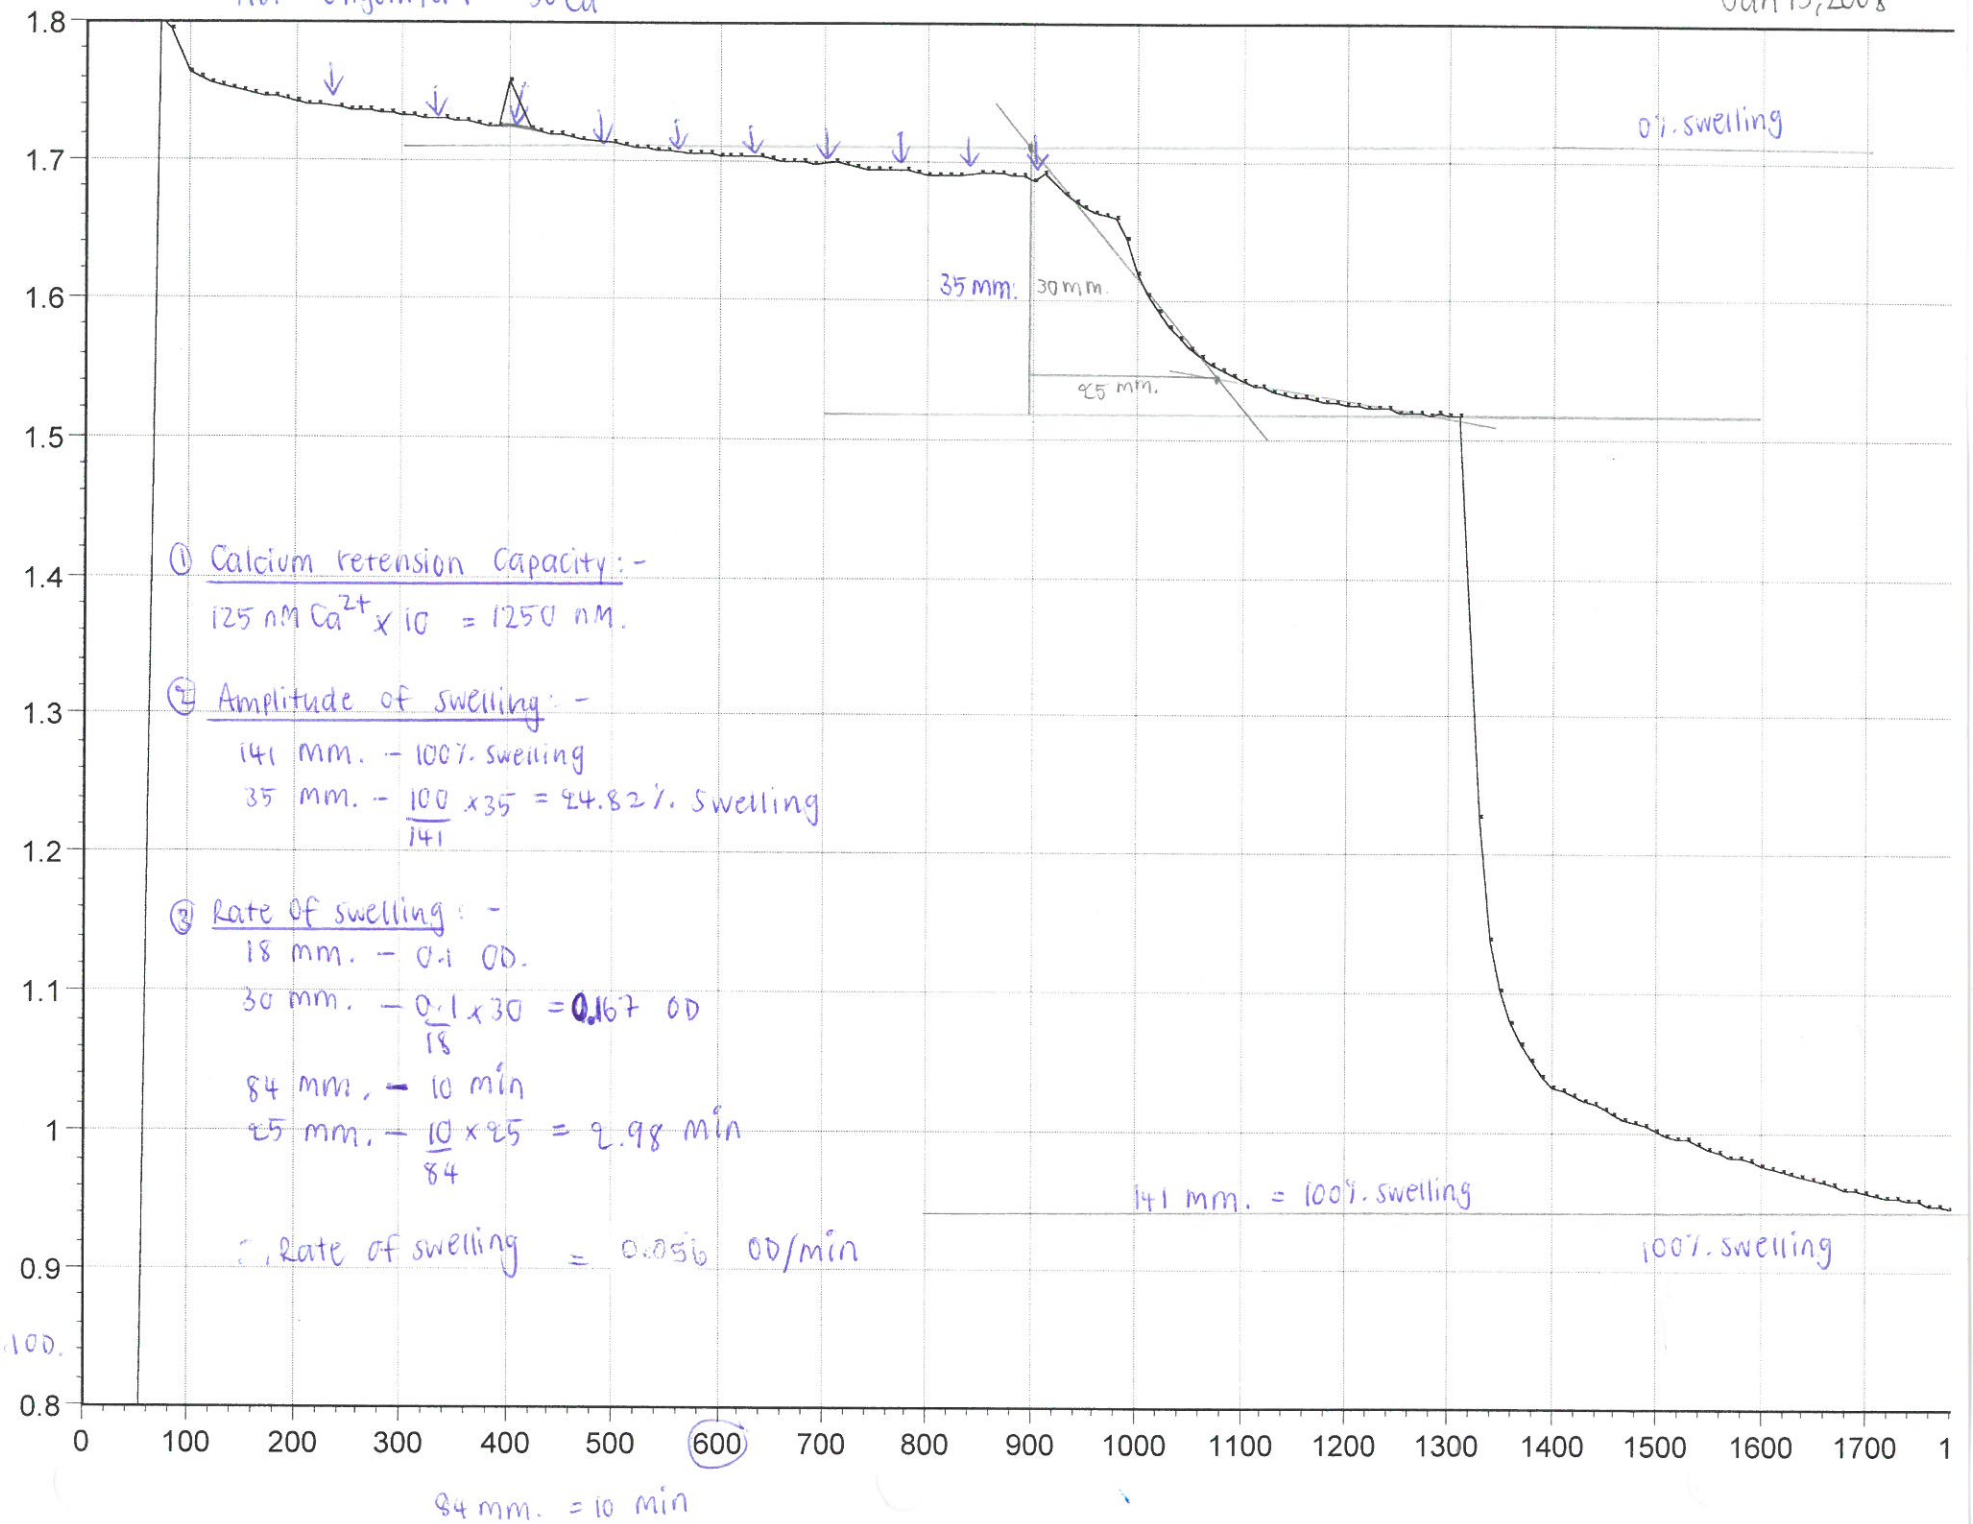

SSM

• FGF2  
• ADP + Oligomycin + 50  $\text{Ca}^{2+}$

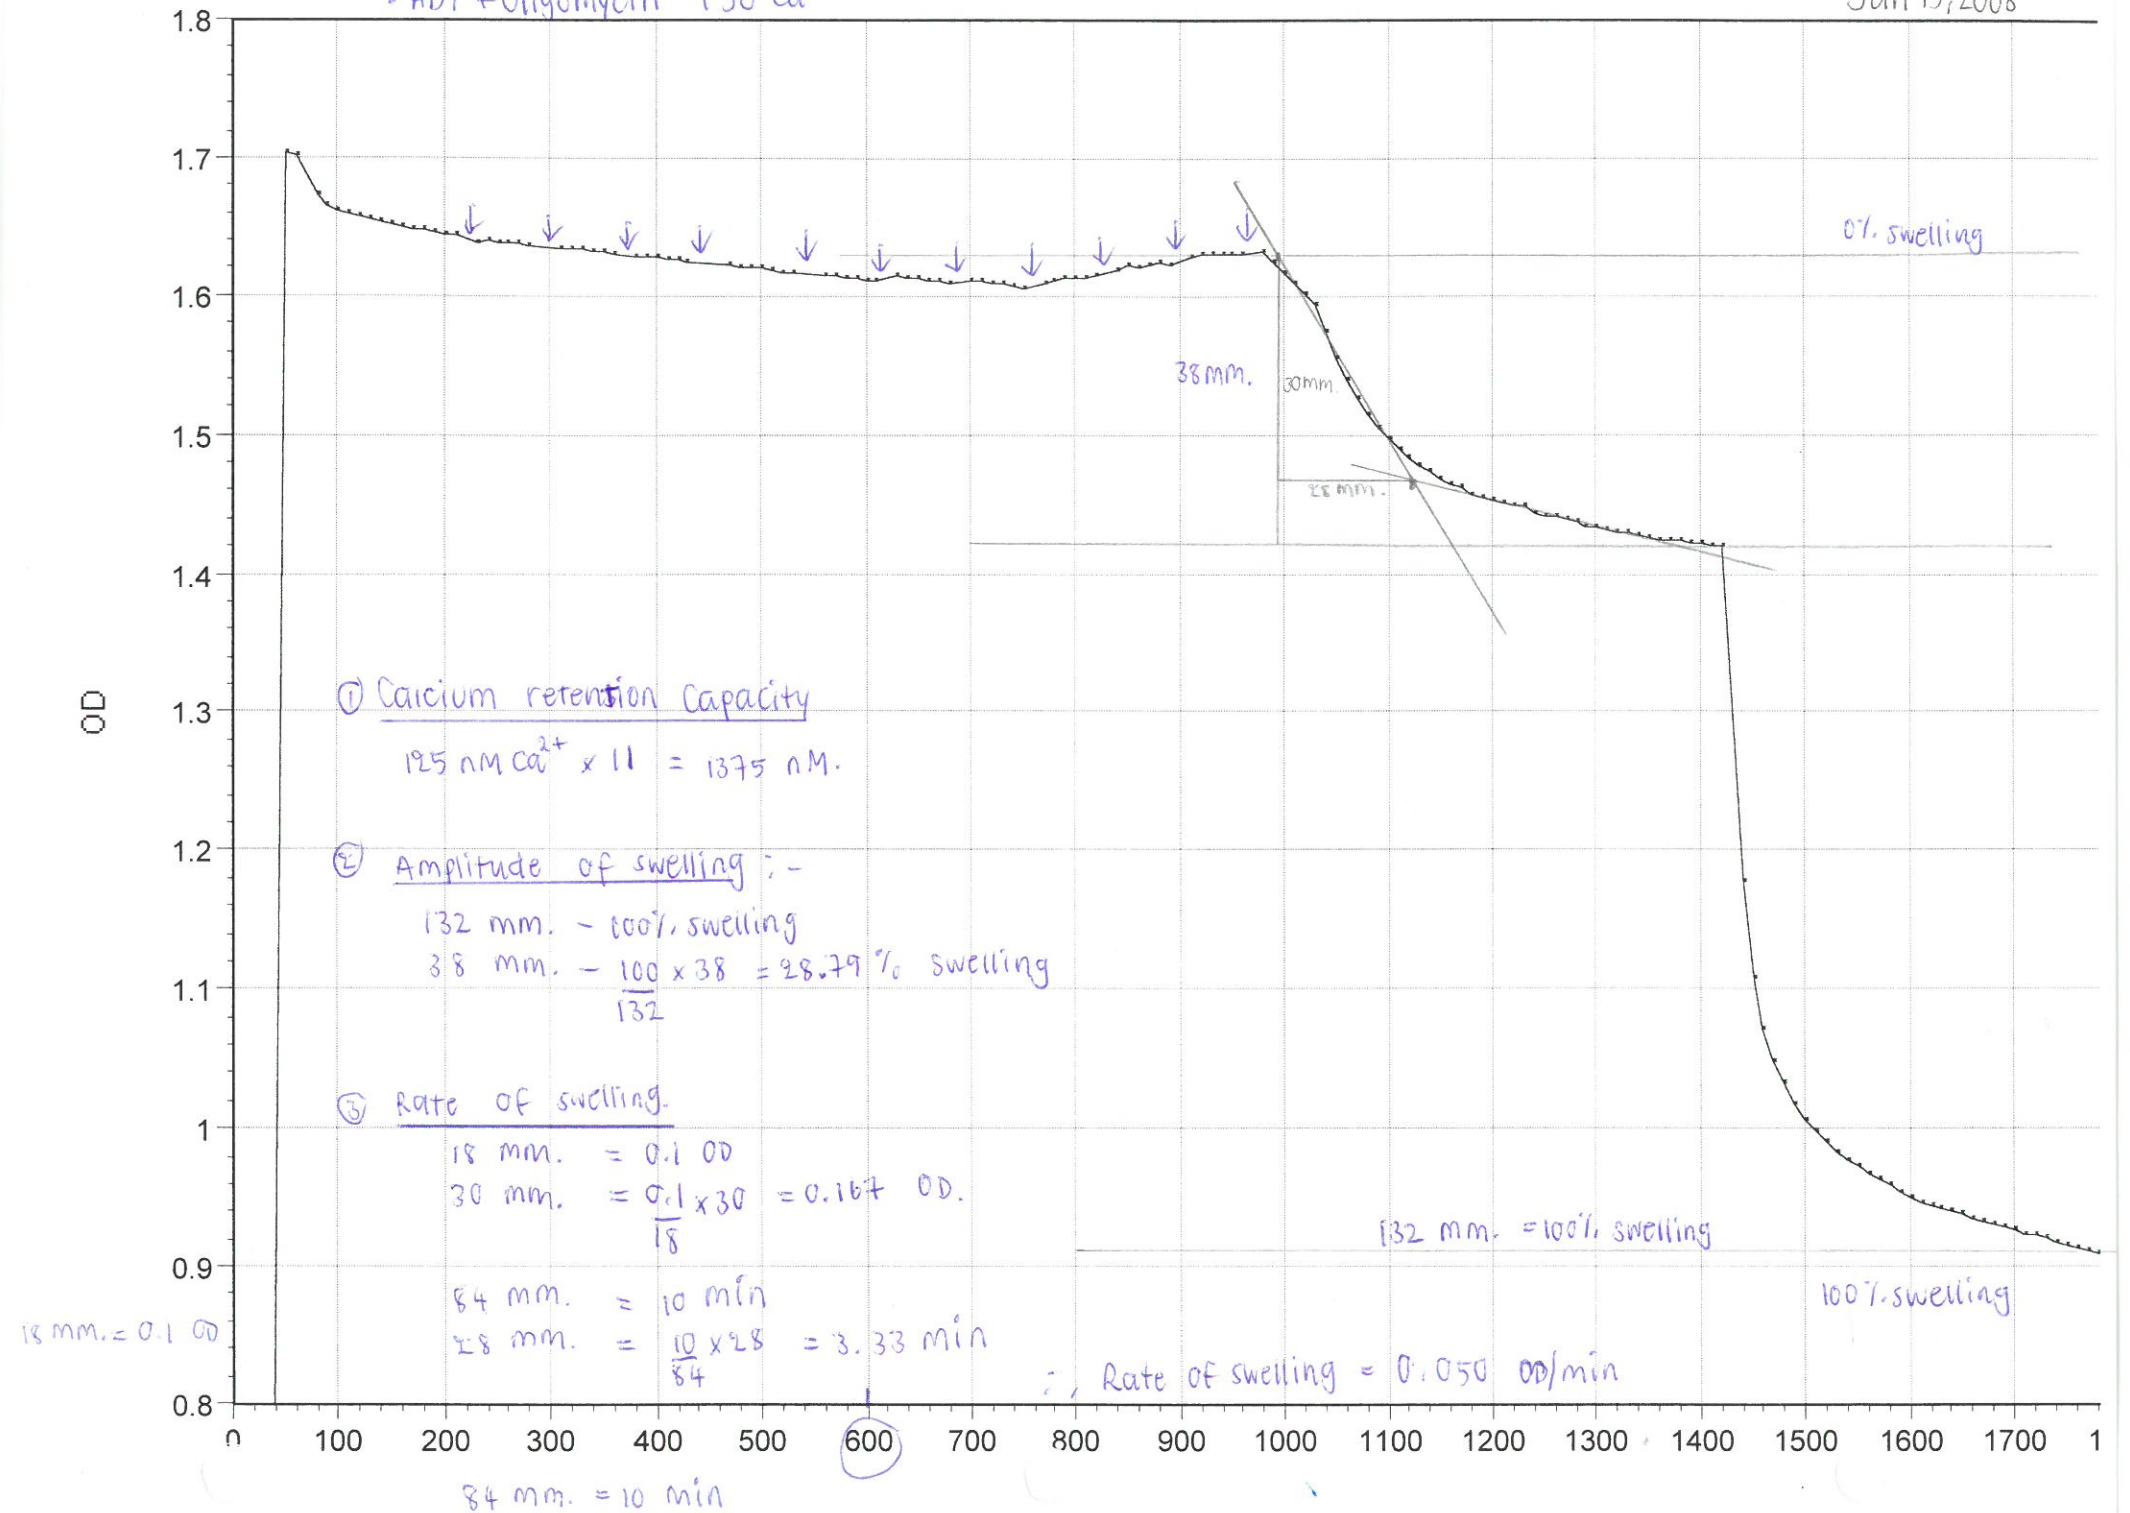

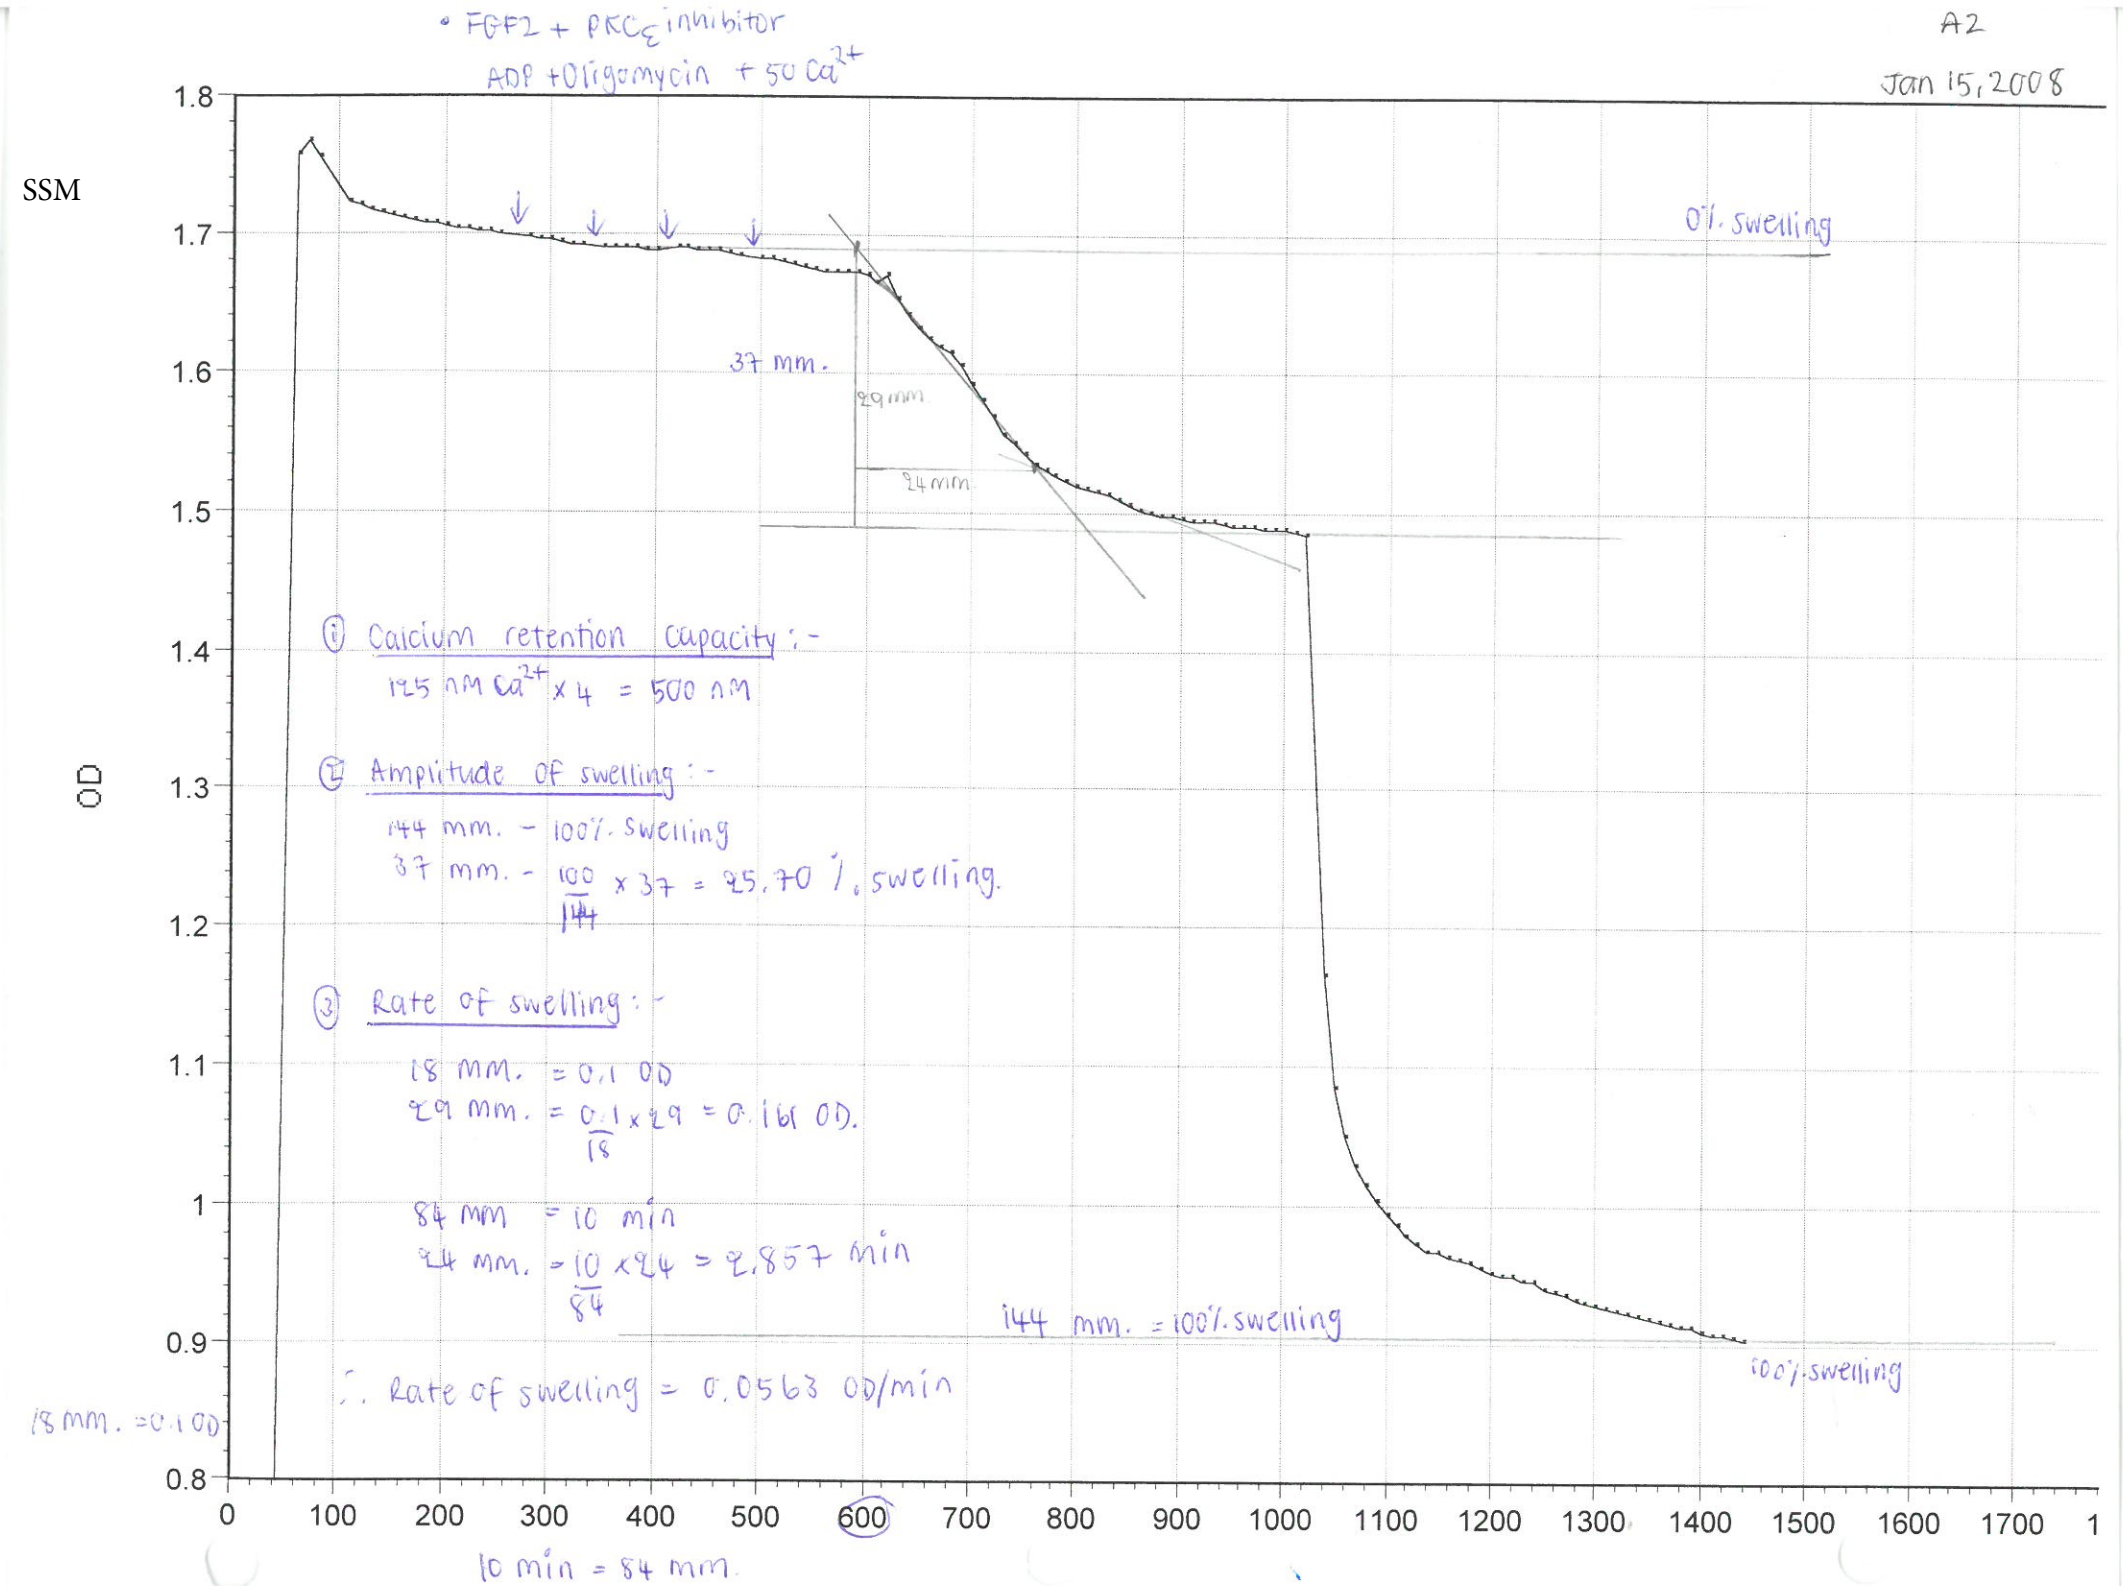



SSM

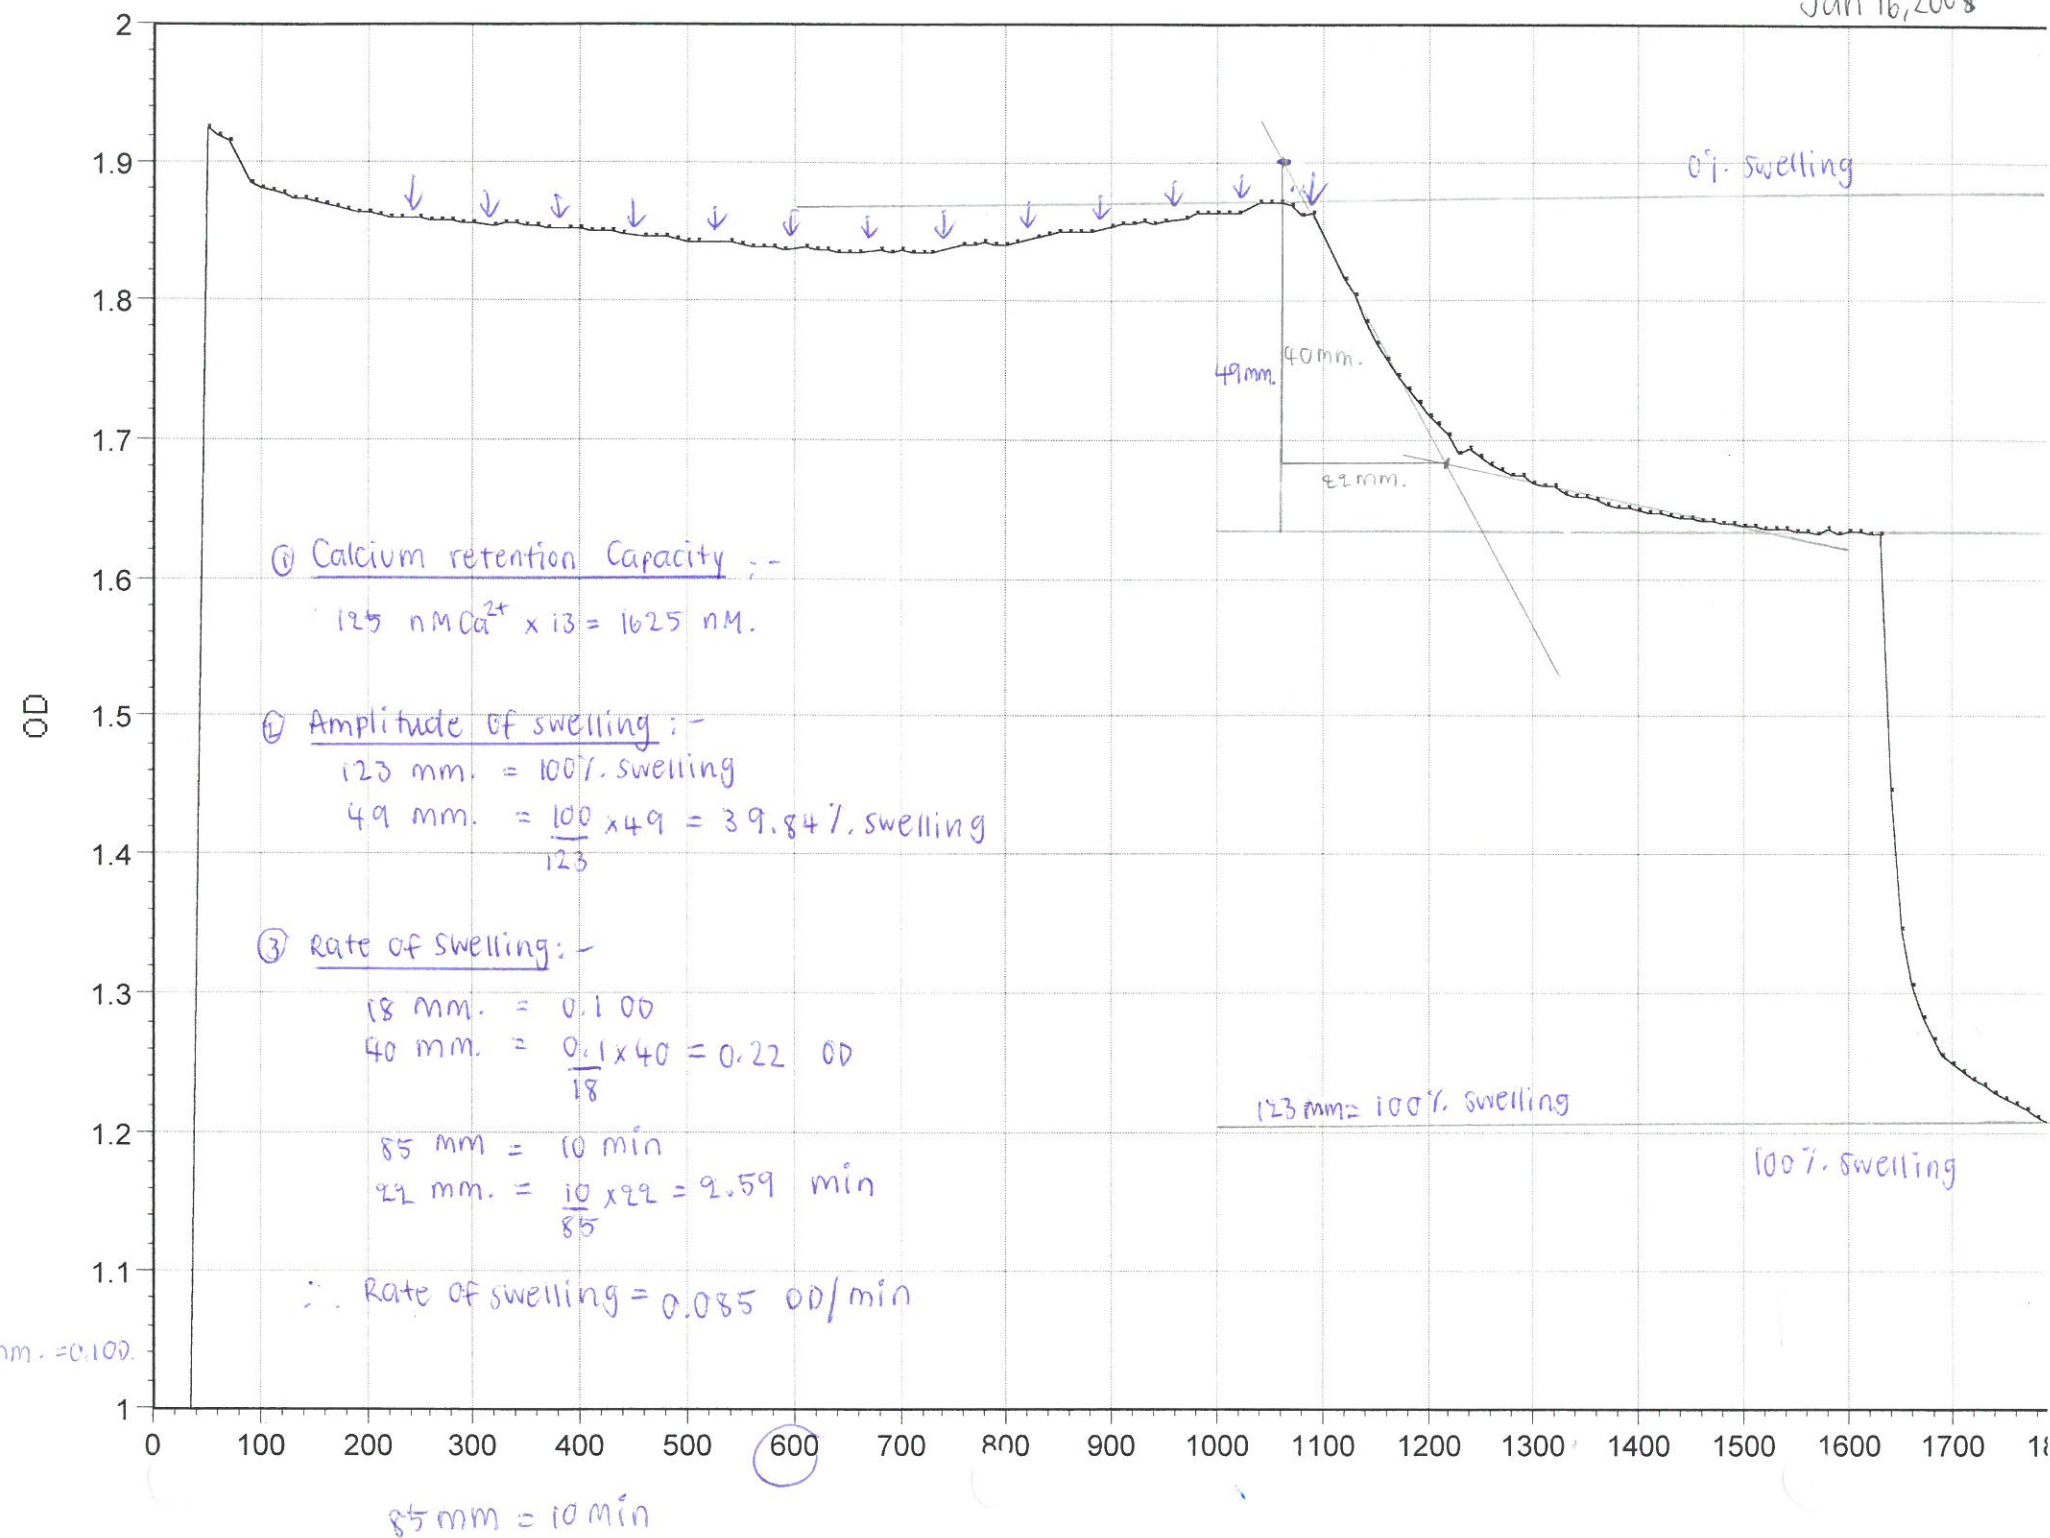



FGF2 + PKC<sub>E</sub> inhibitor  
 • ADP + Oligomycin + 50 Ca<sup>2+</sup>

A2  
 Jan 16, 2008

SSM

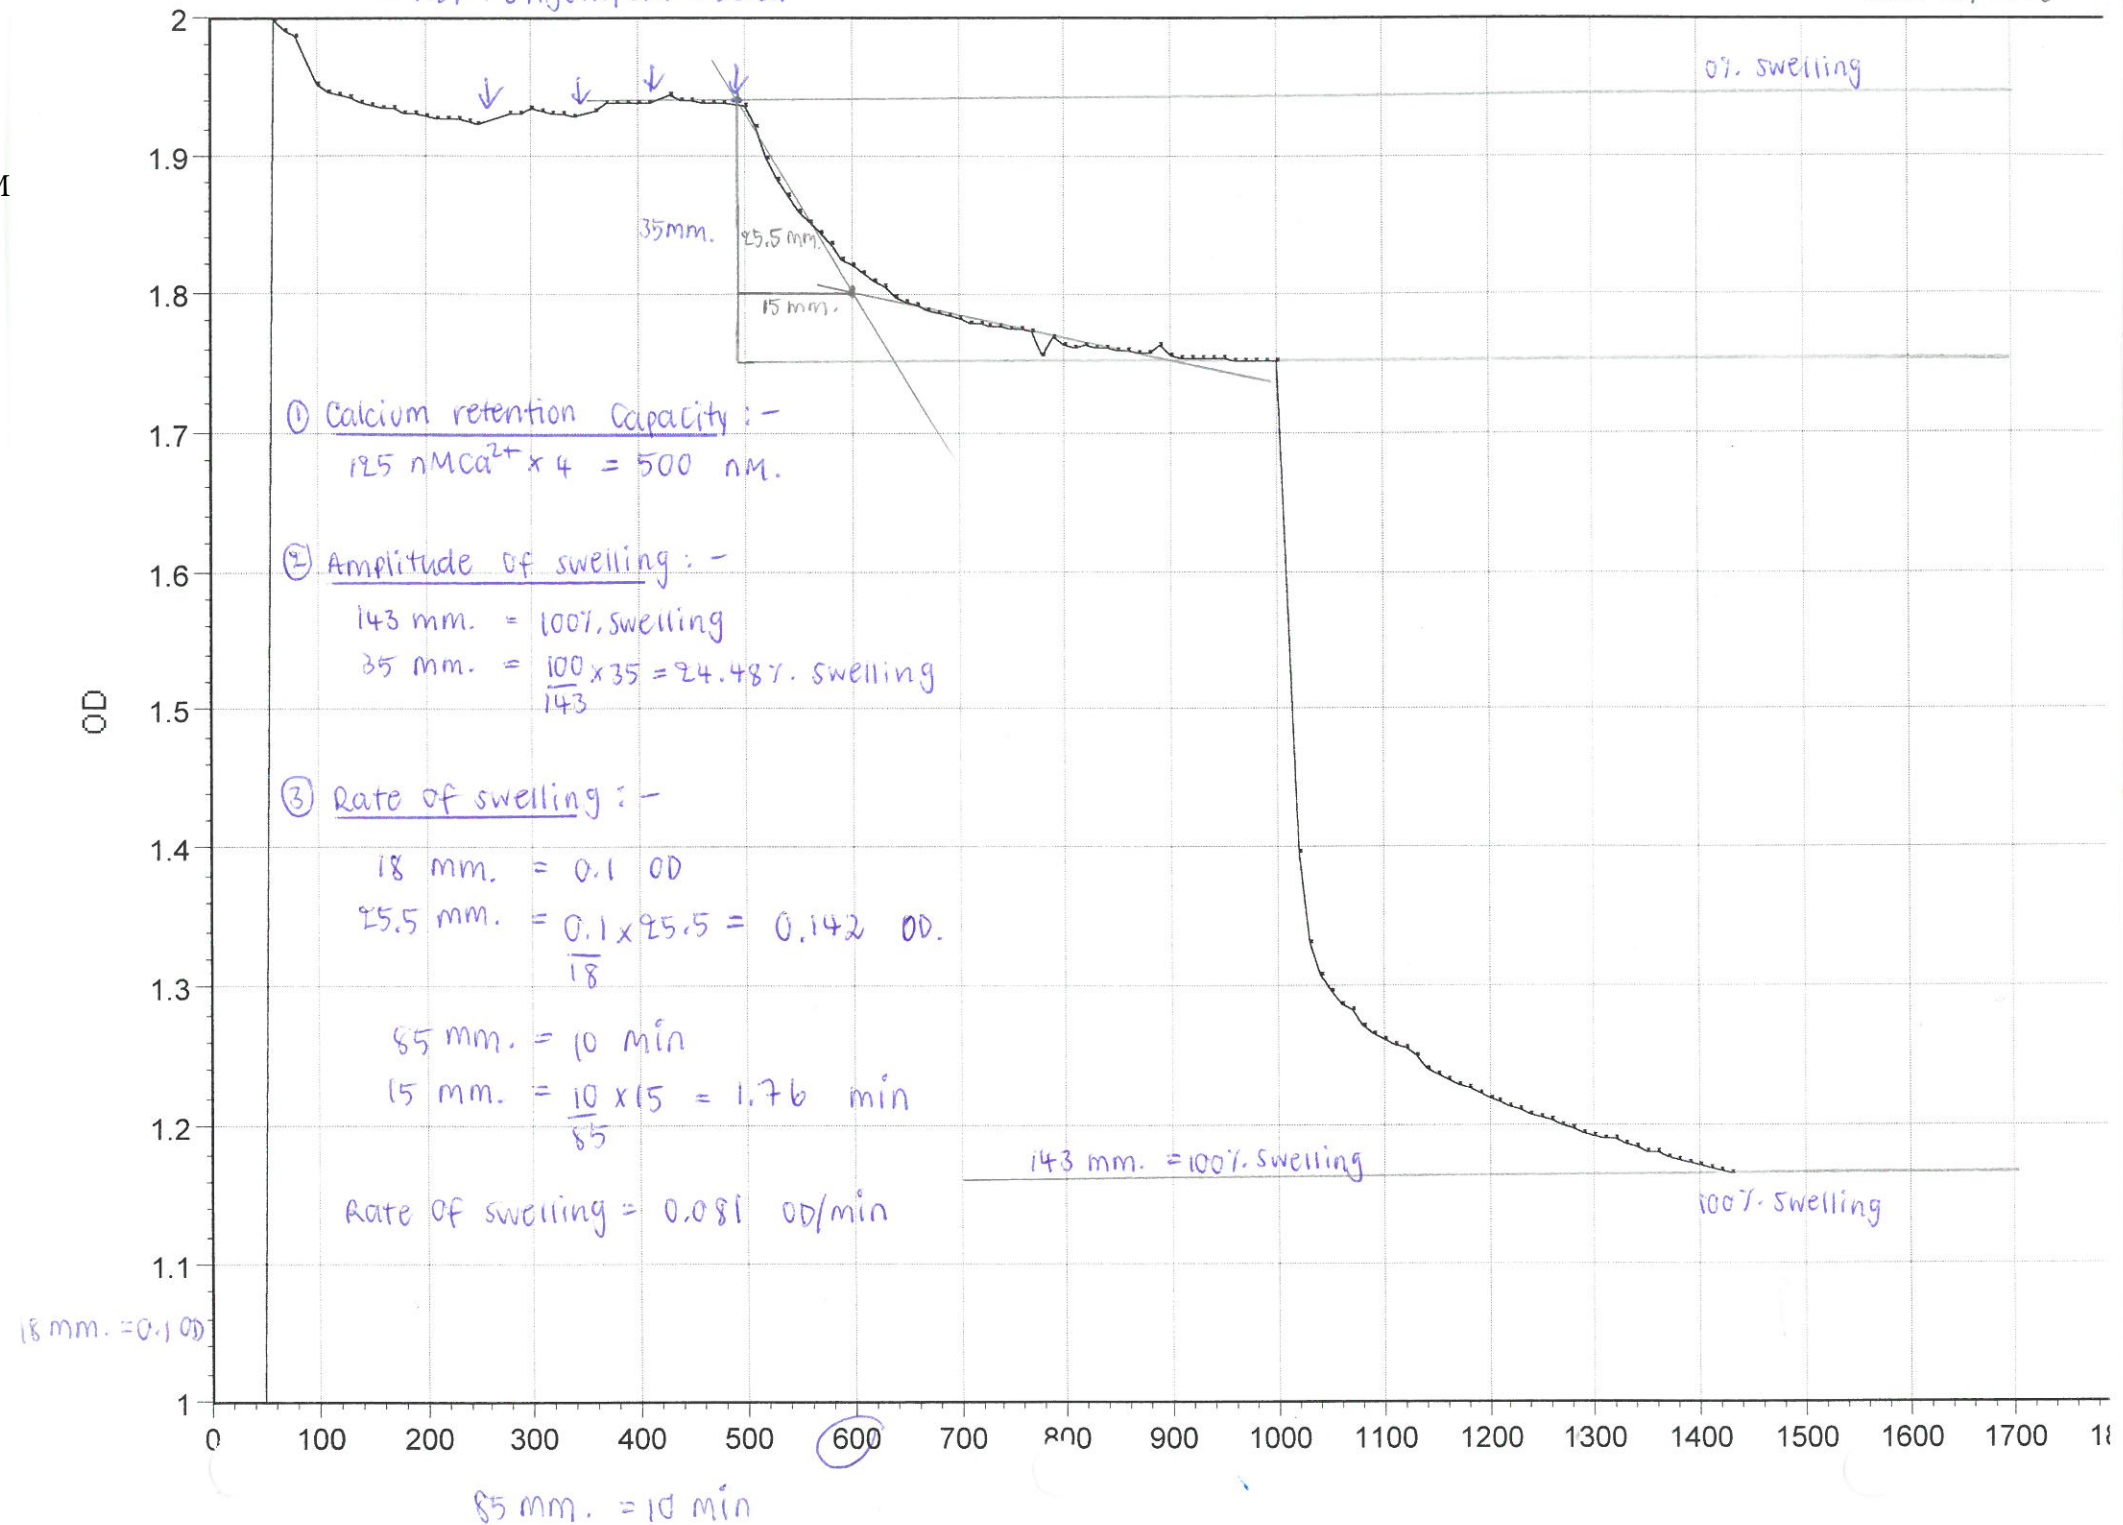

No any treatments

A1

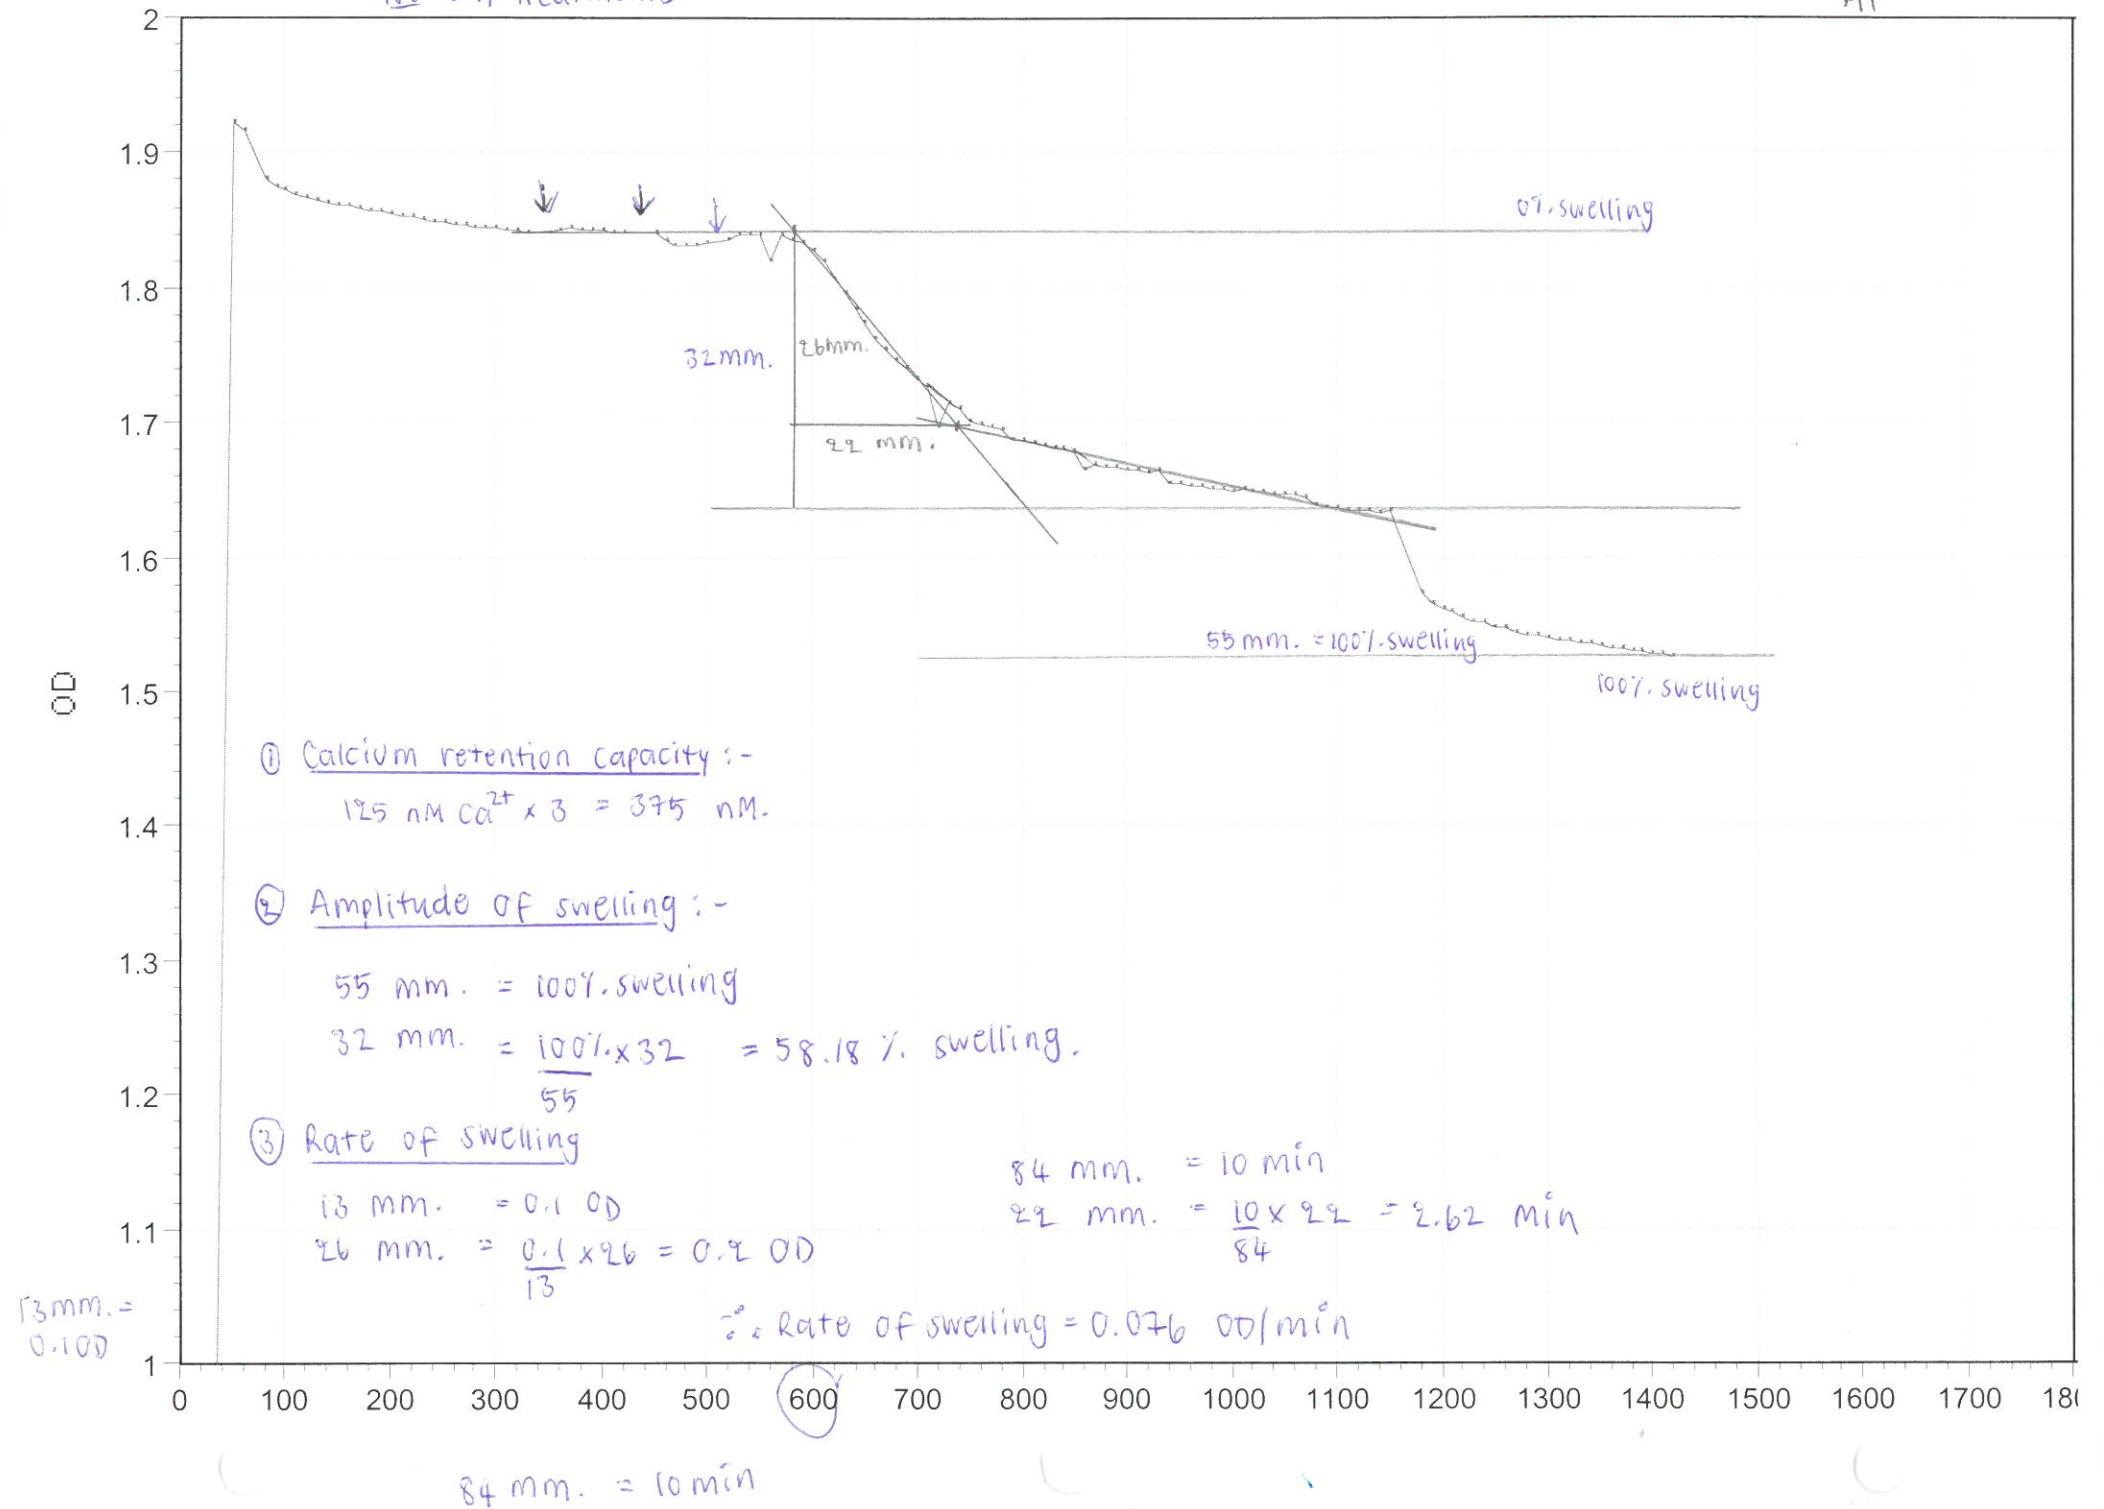

Jan, 2008

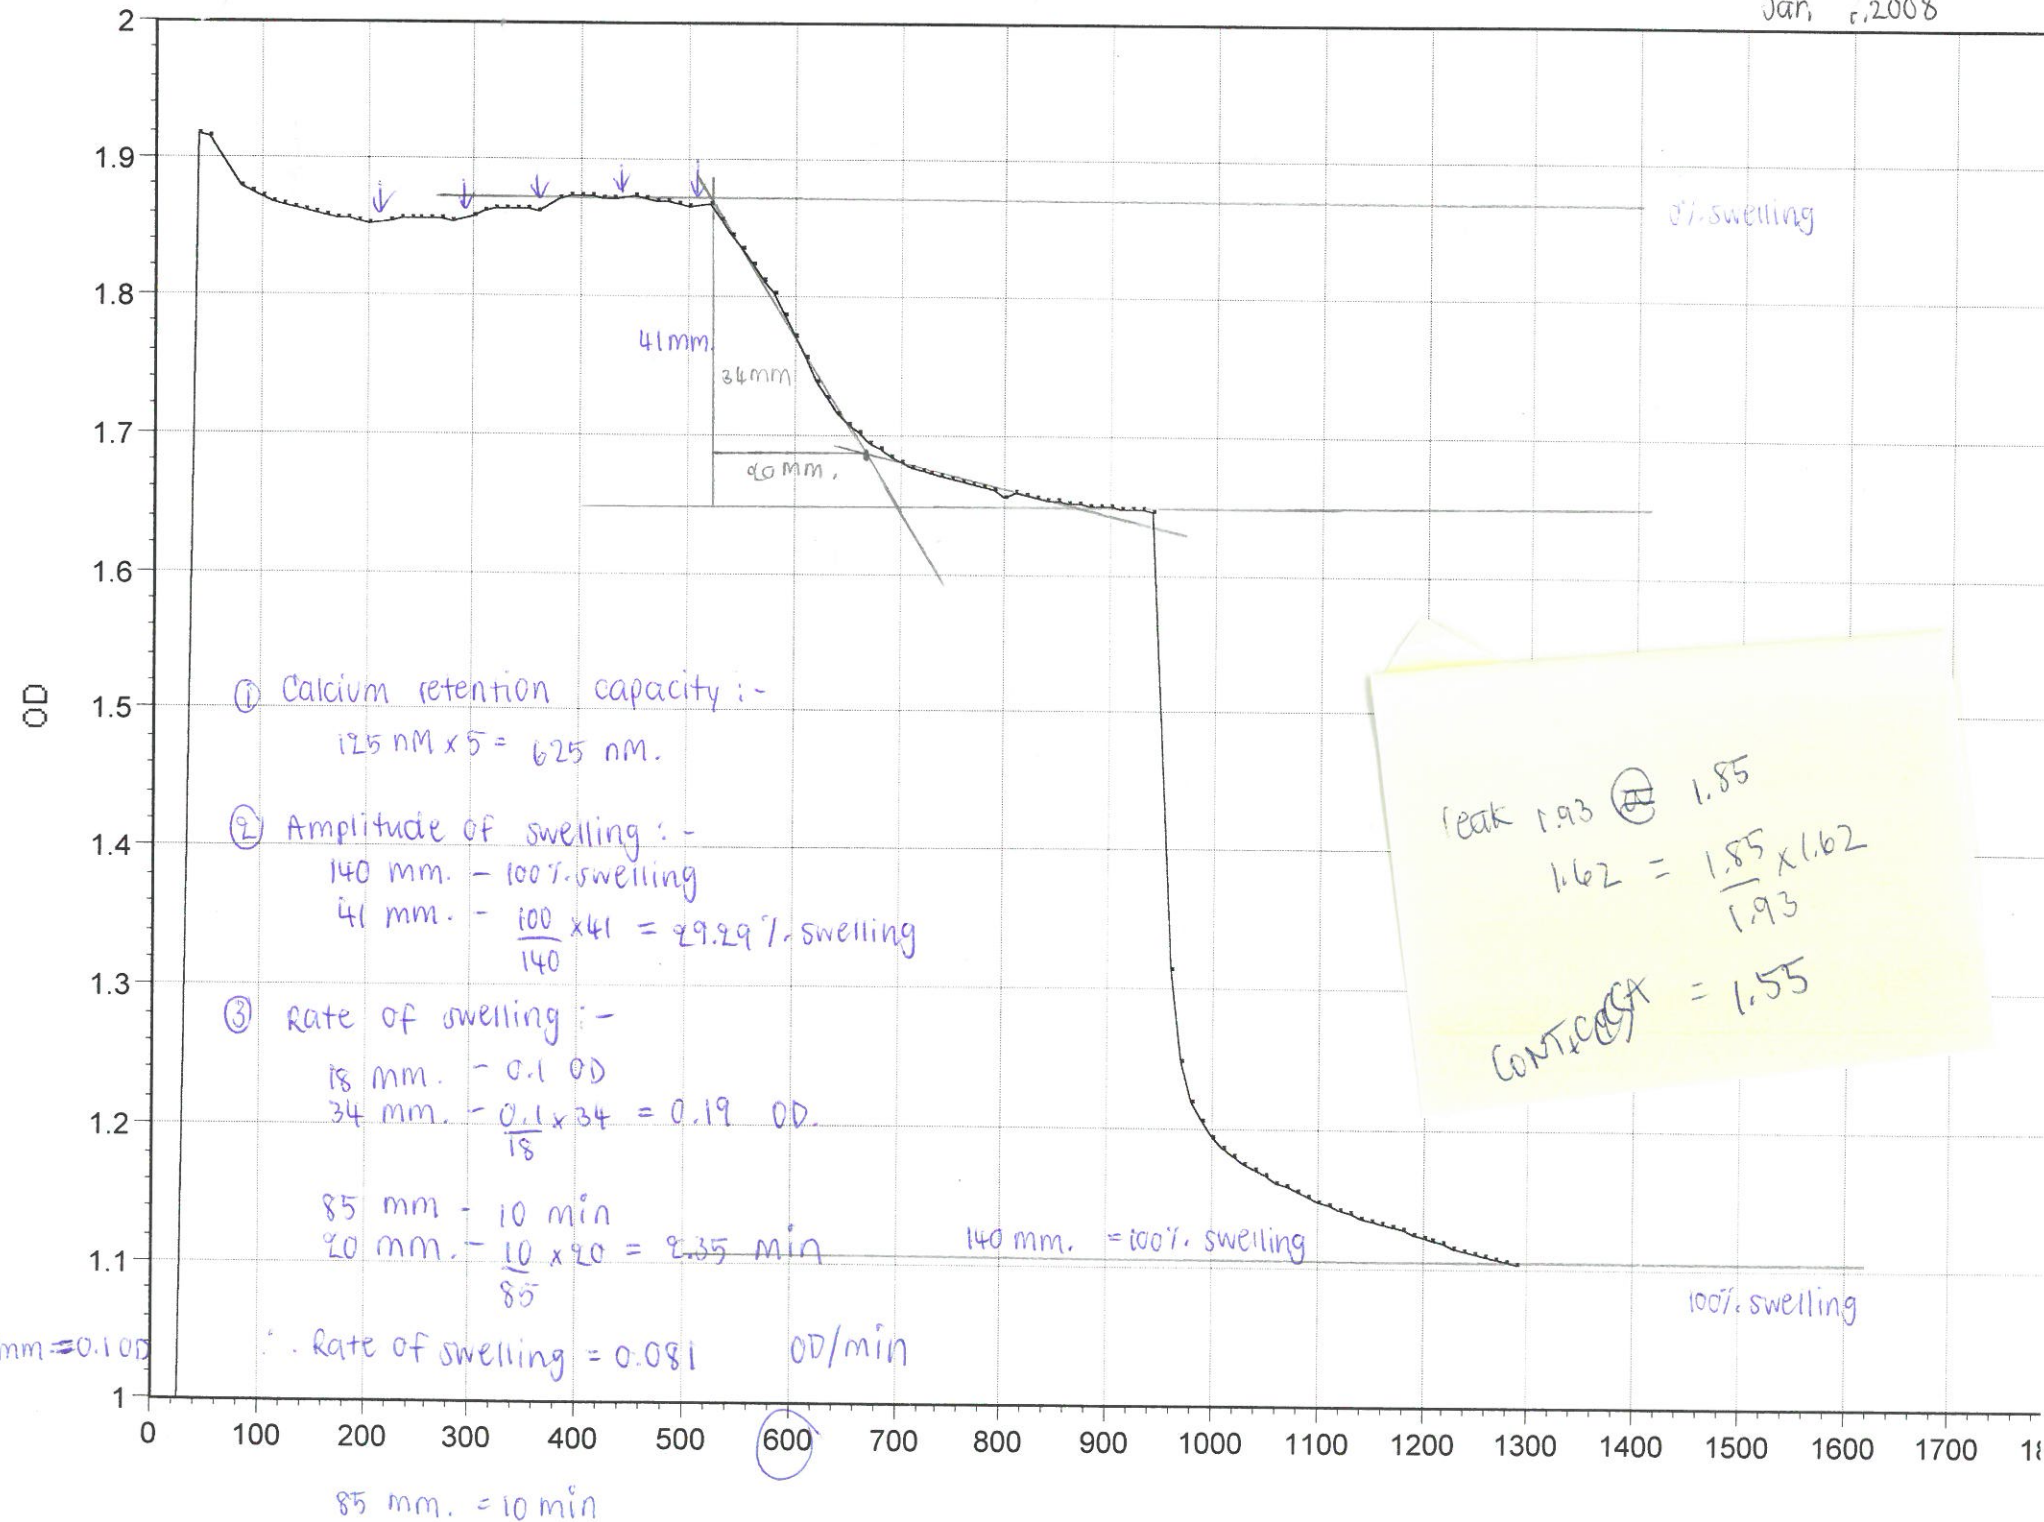



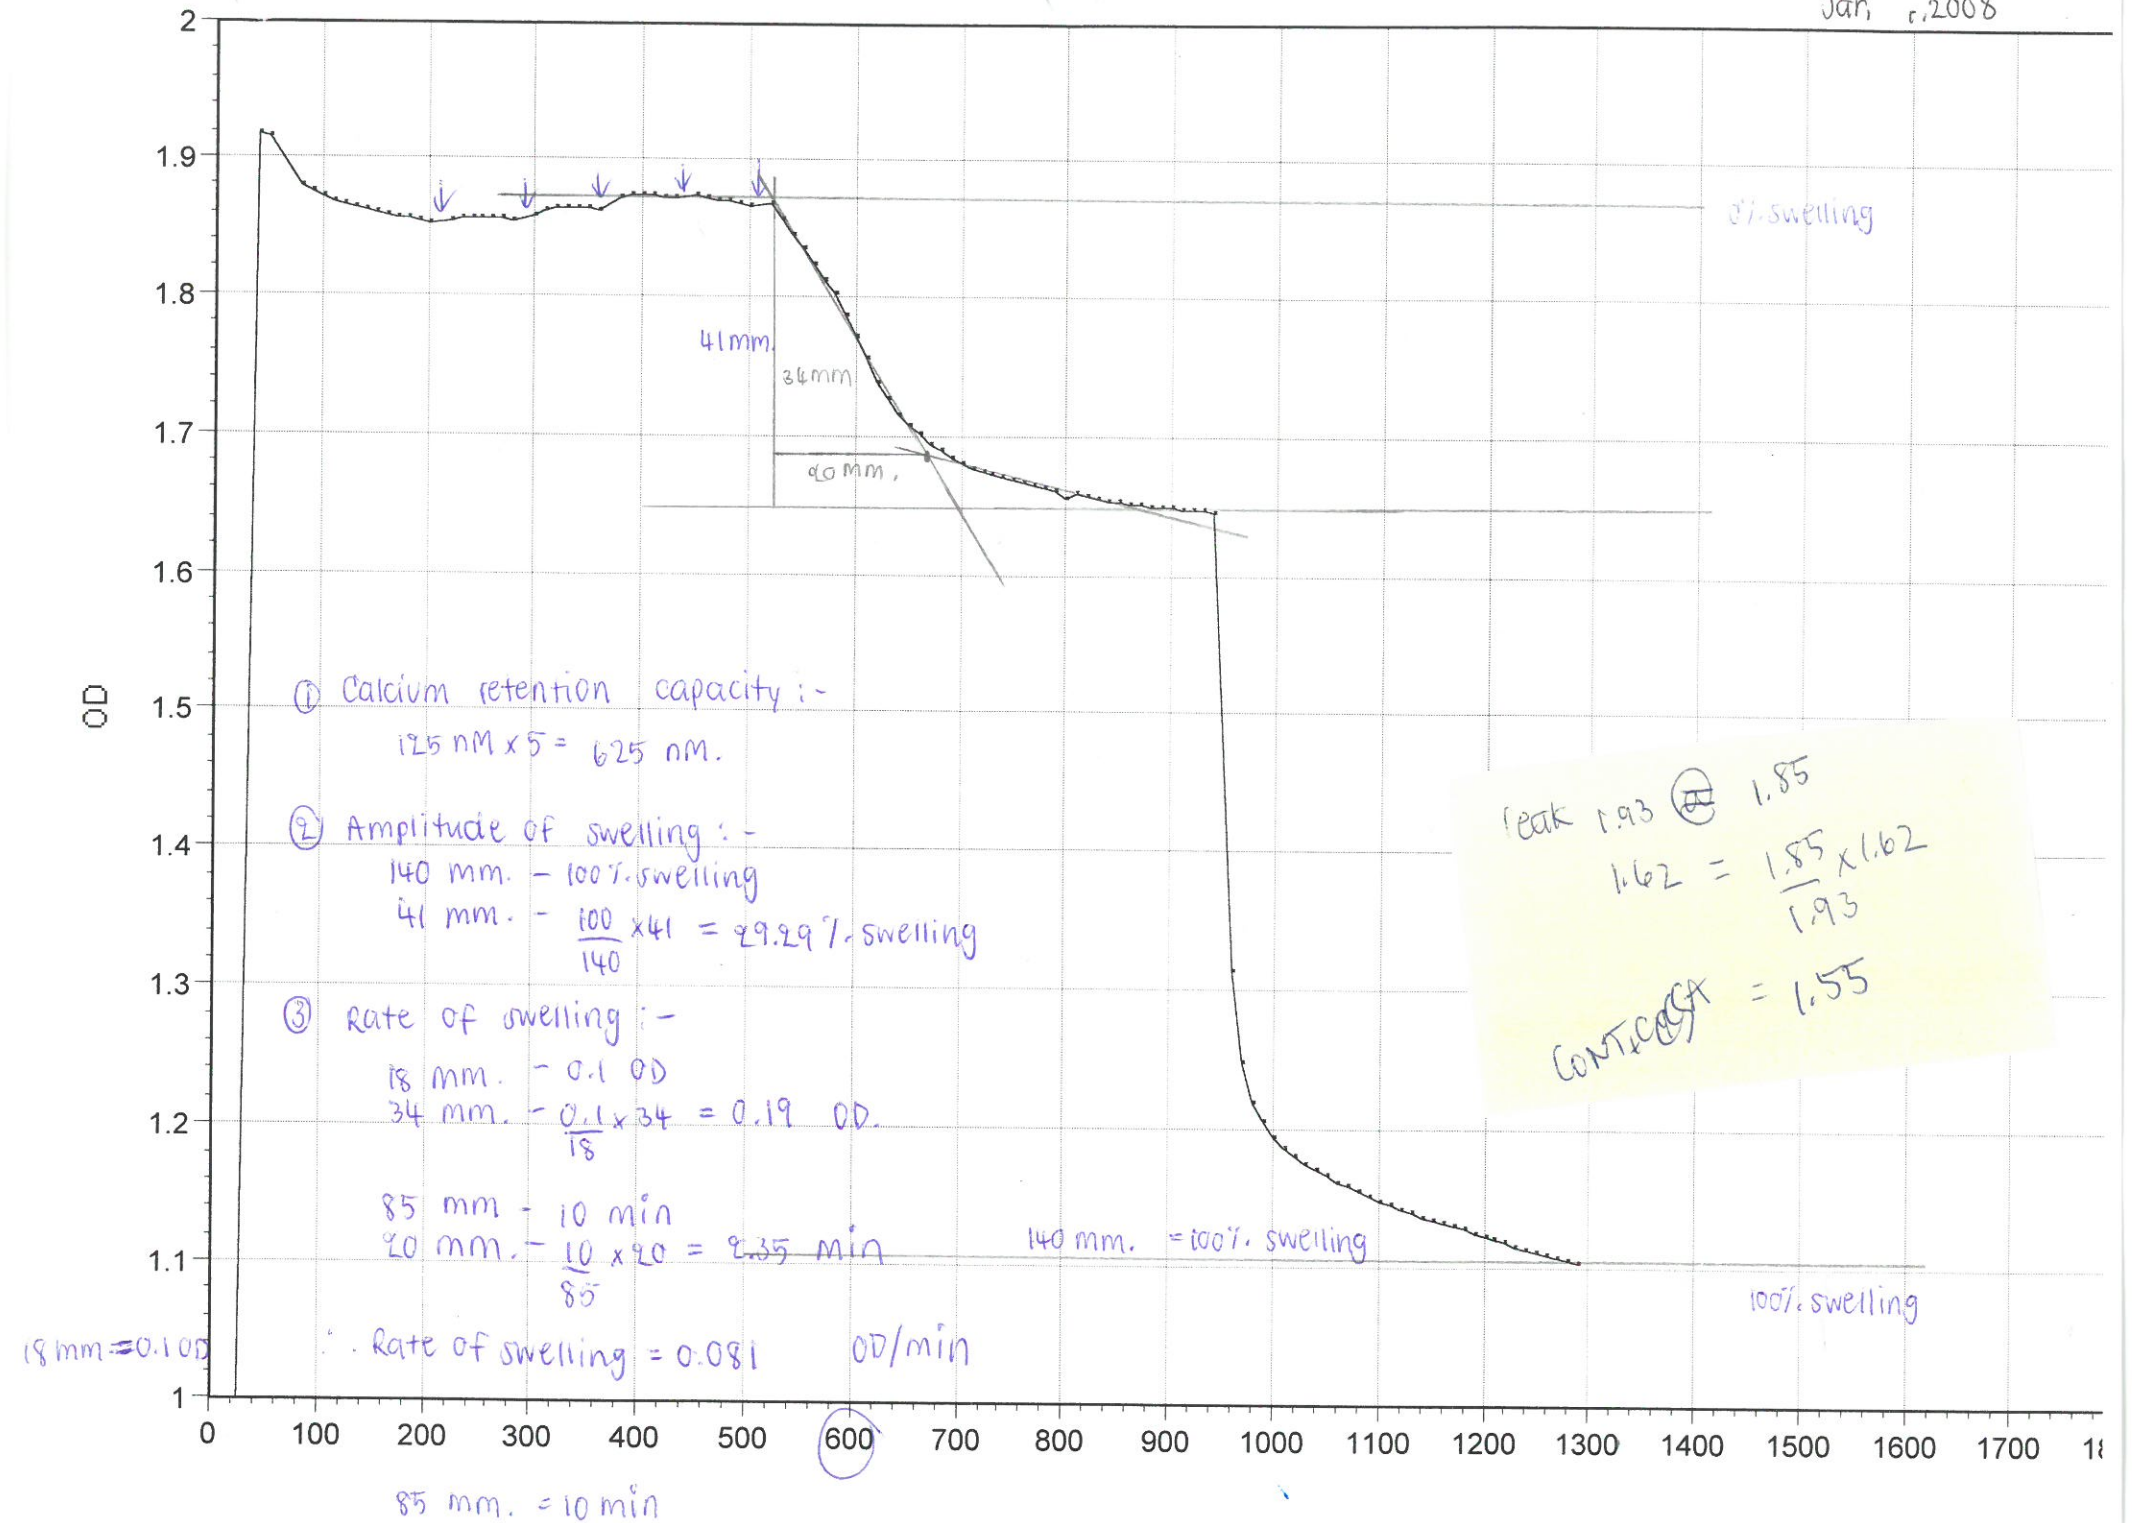

SSM

ADP + Oligomycin + F<sub>1</sub>F<sub>2</sub> (x9)

A2 (RHM)

Jan 21, 2008

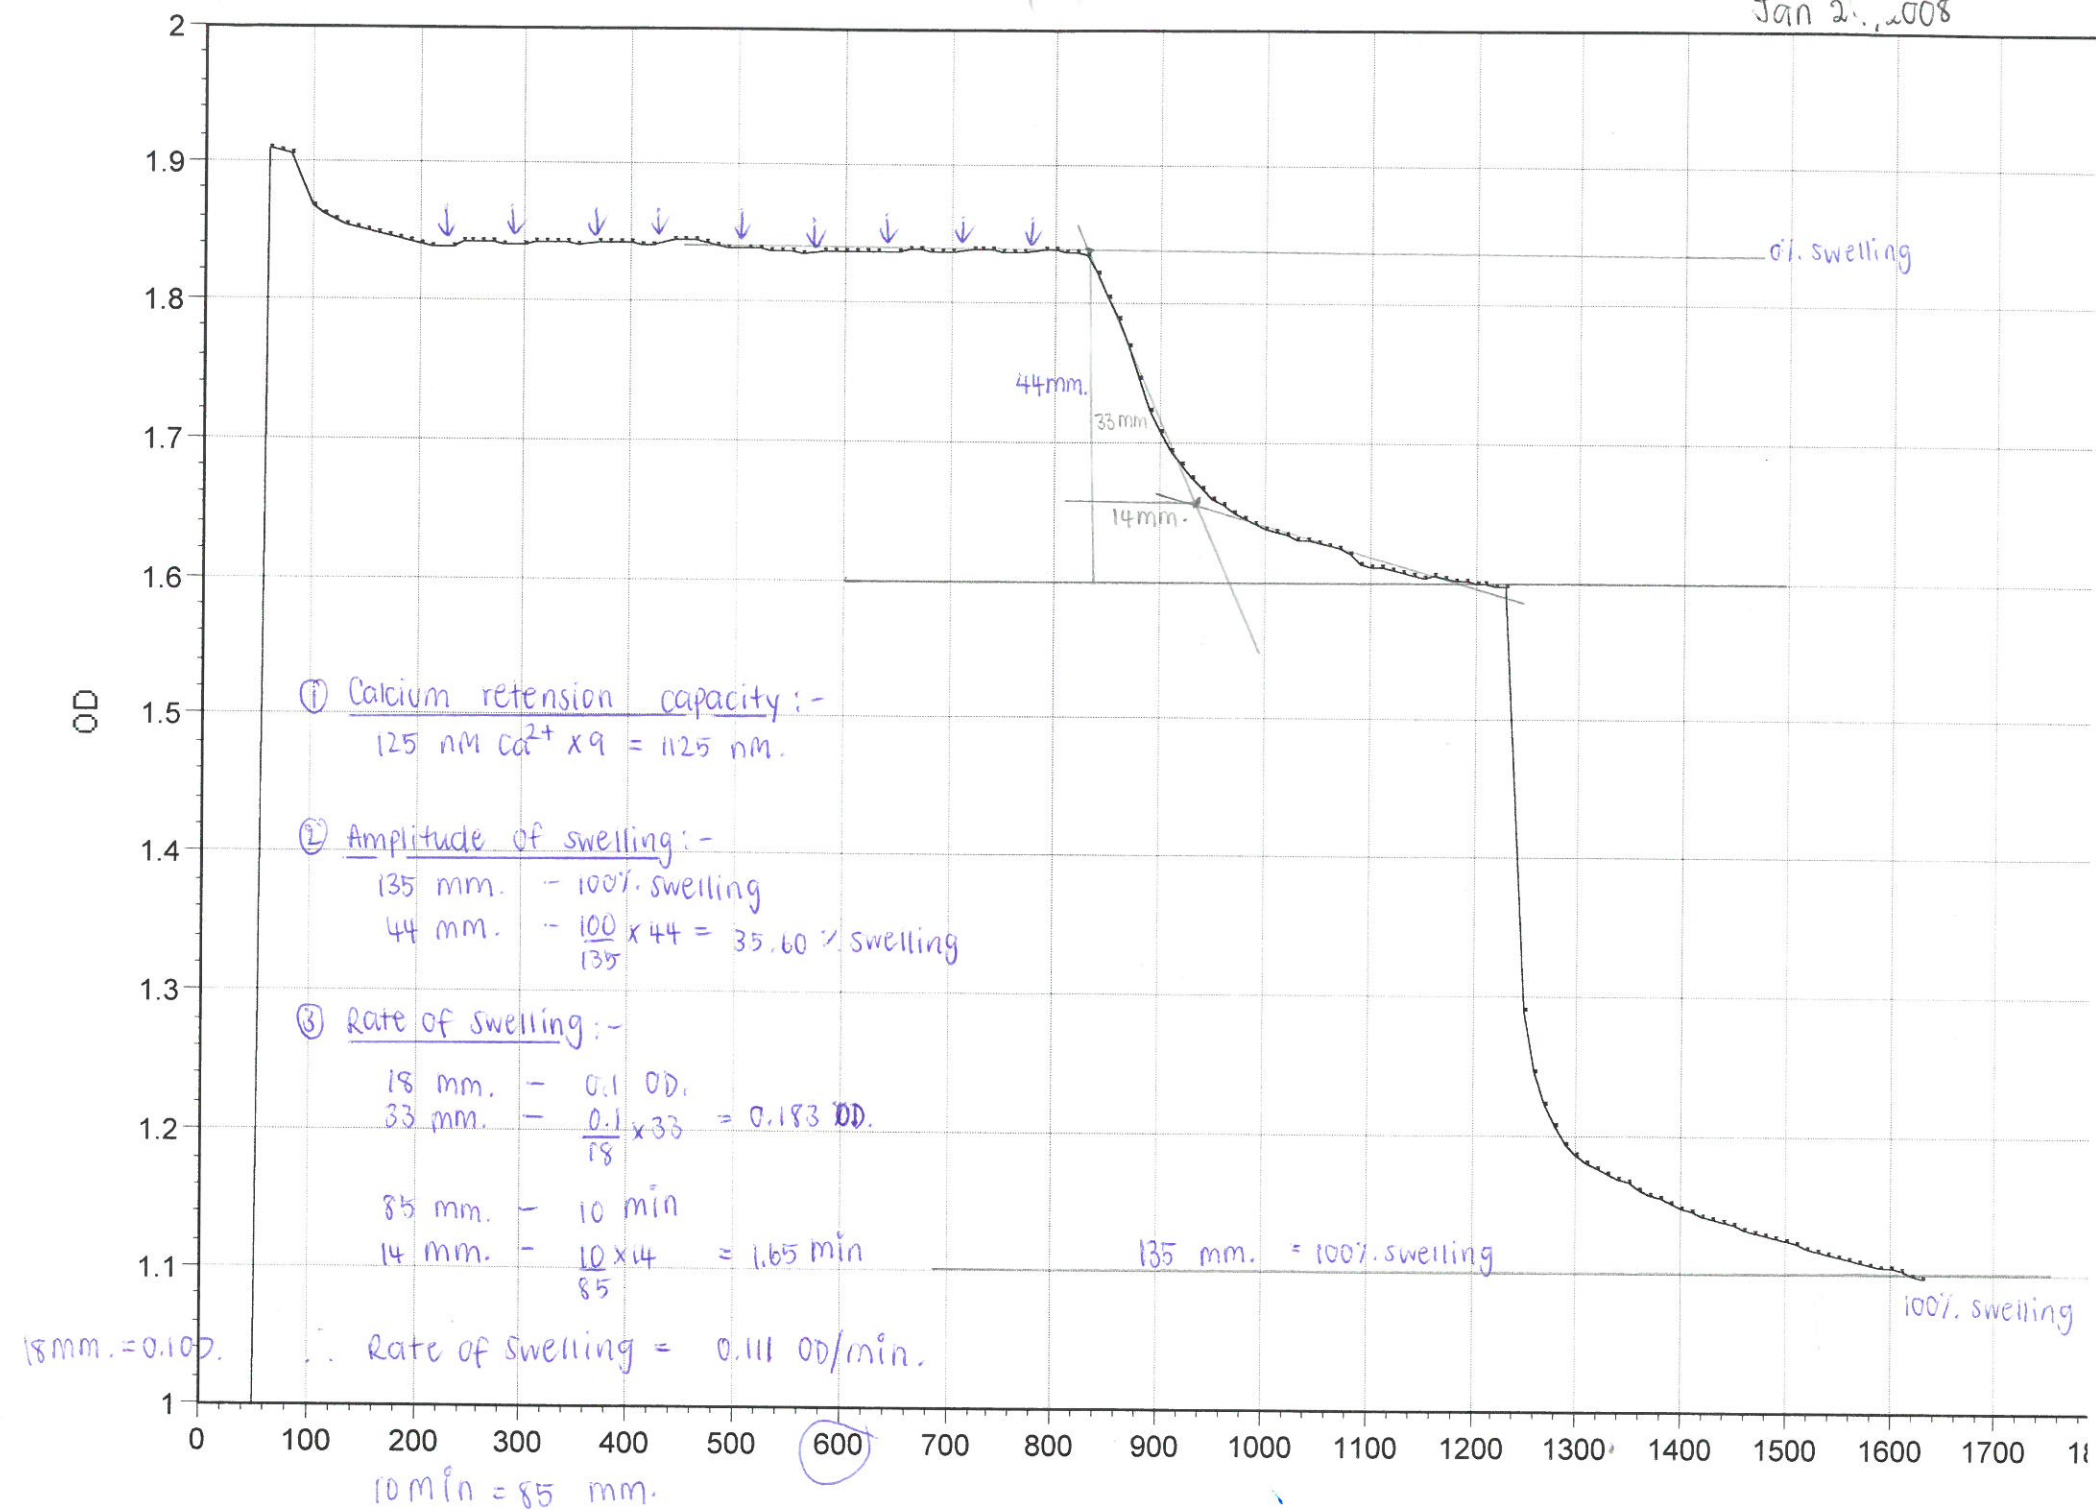



Jan 24, 2008

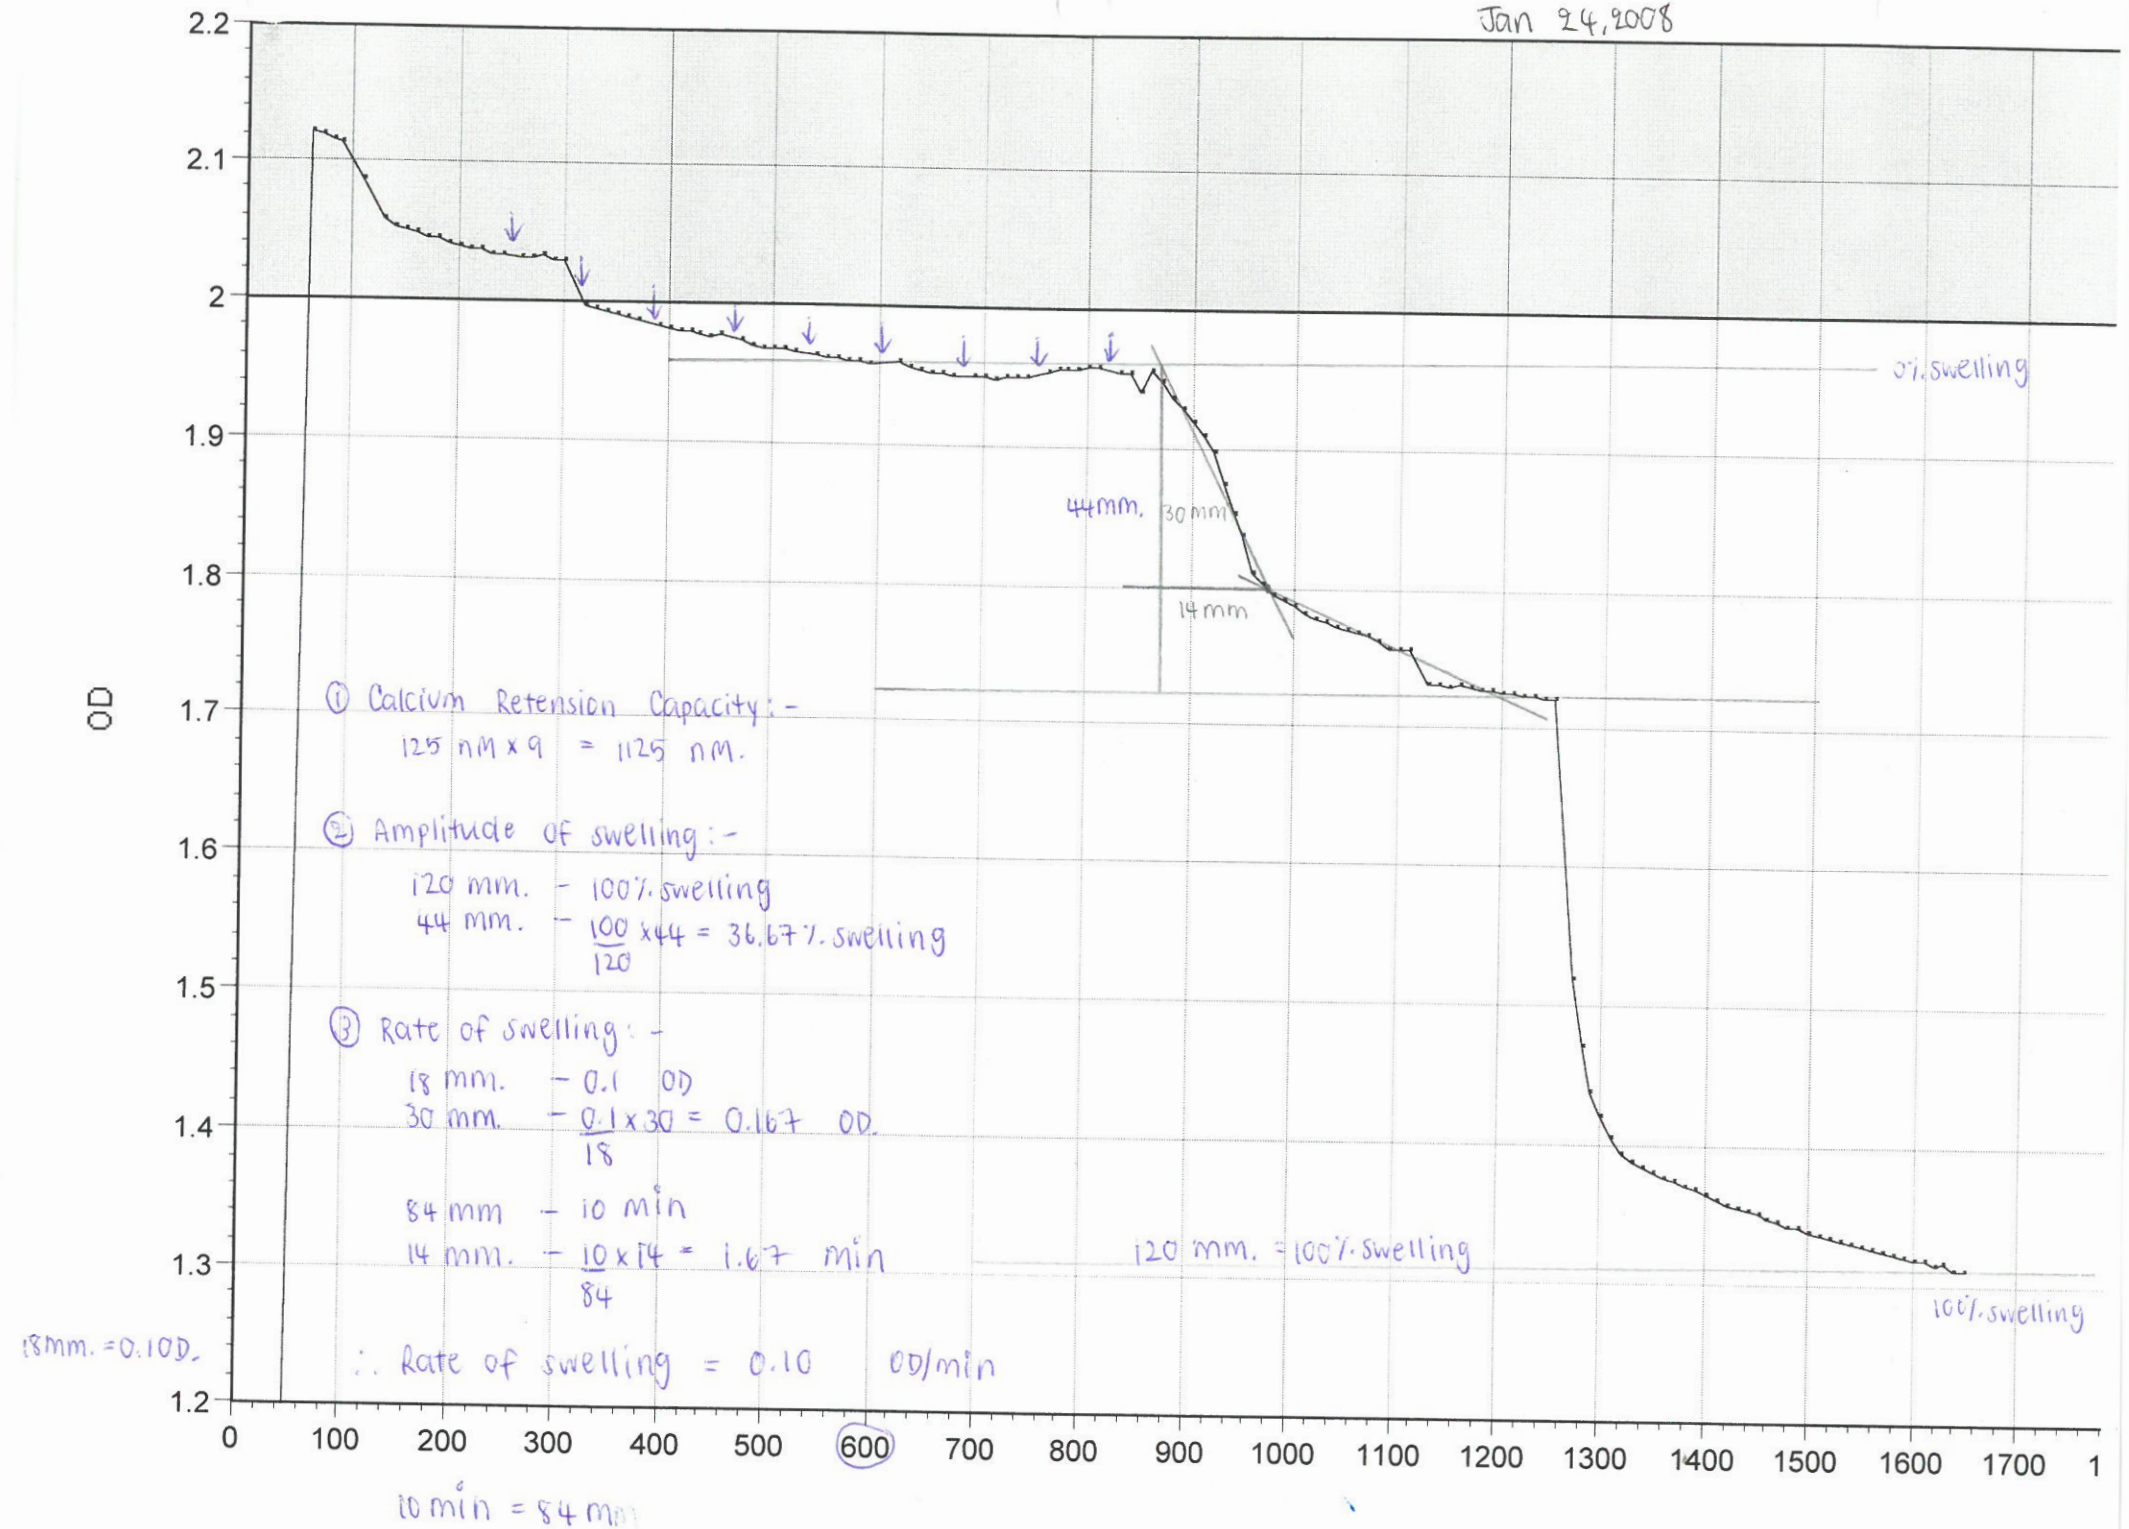

ADP + Oligo  $\rightarrow$  50 mM  $\text{Ca}^{2+}$  (x4)

liver

Xi (RLM)

Jan 22, 2008

LIVER

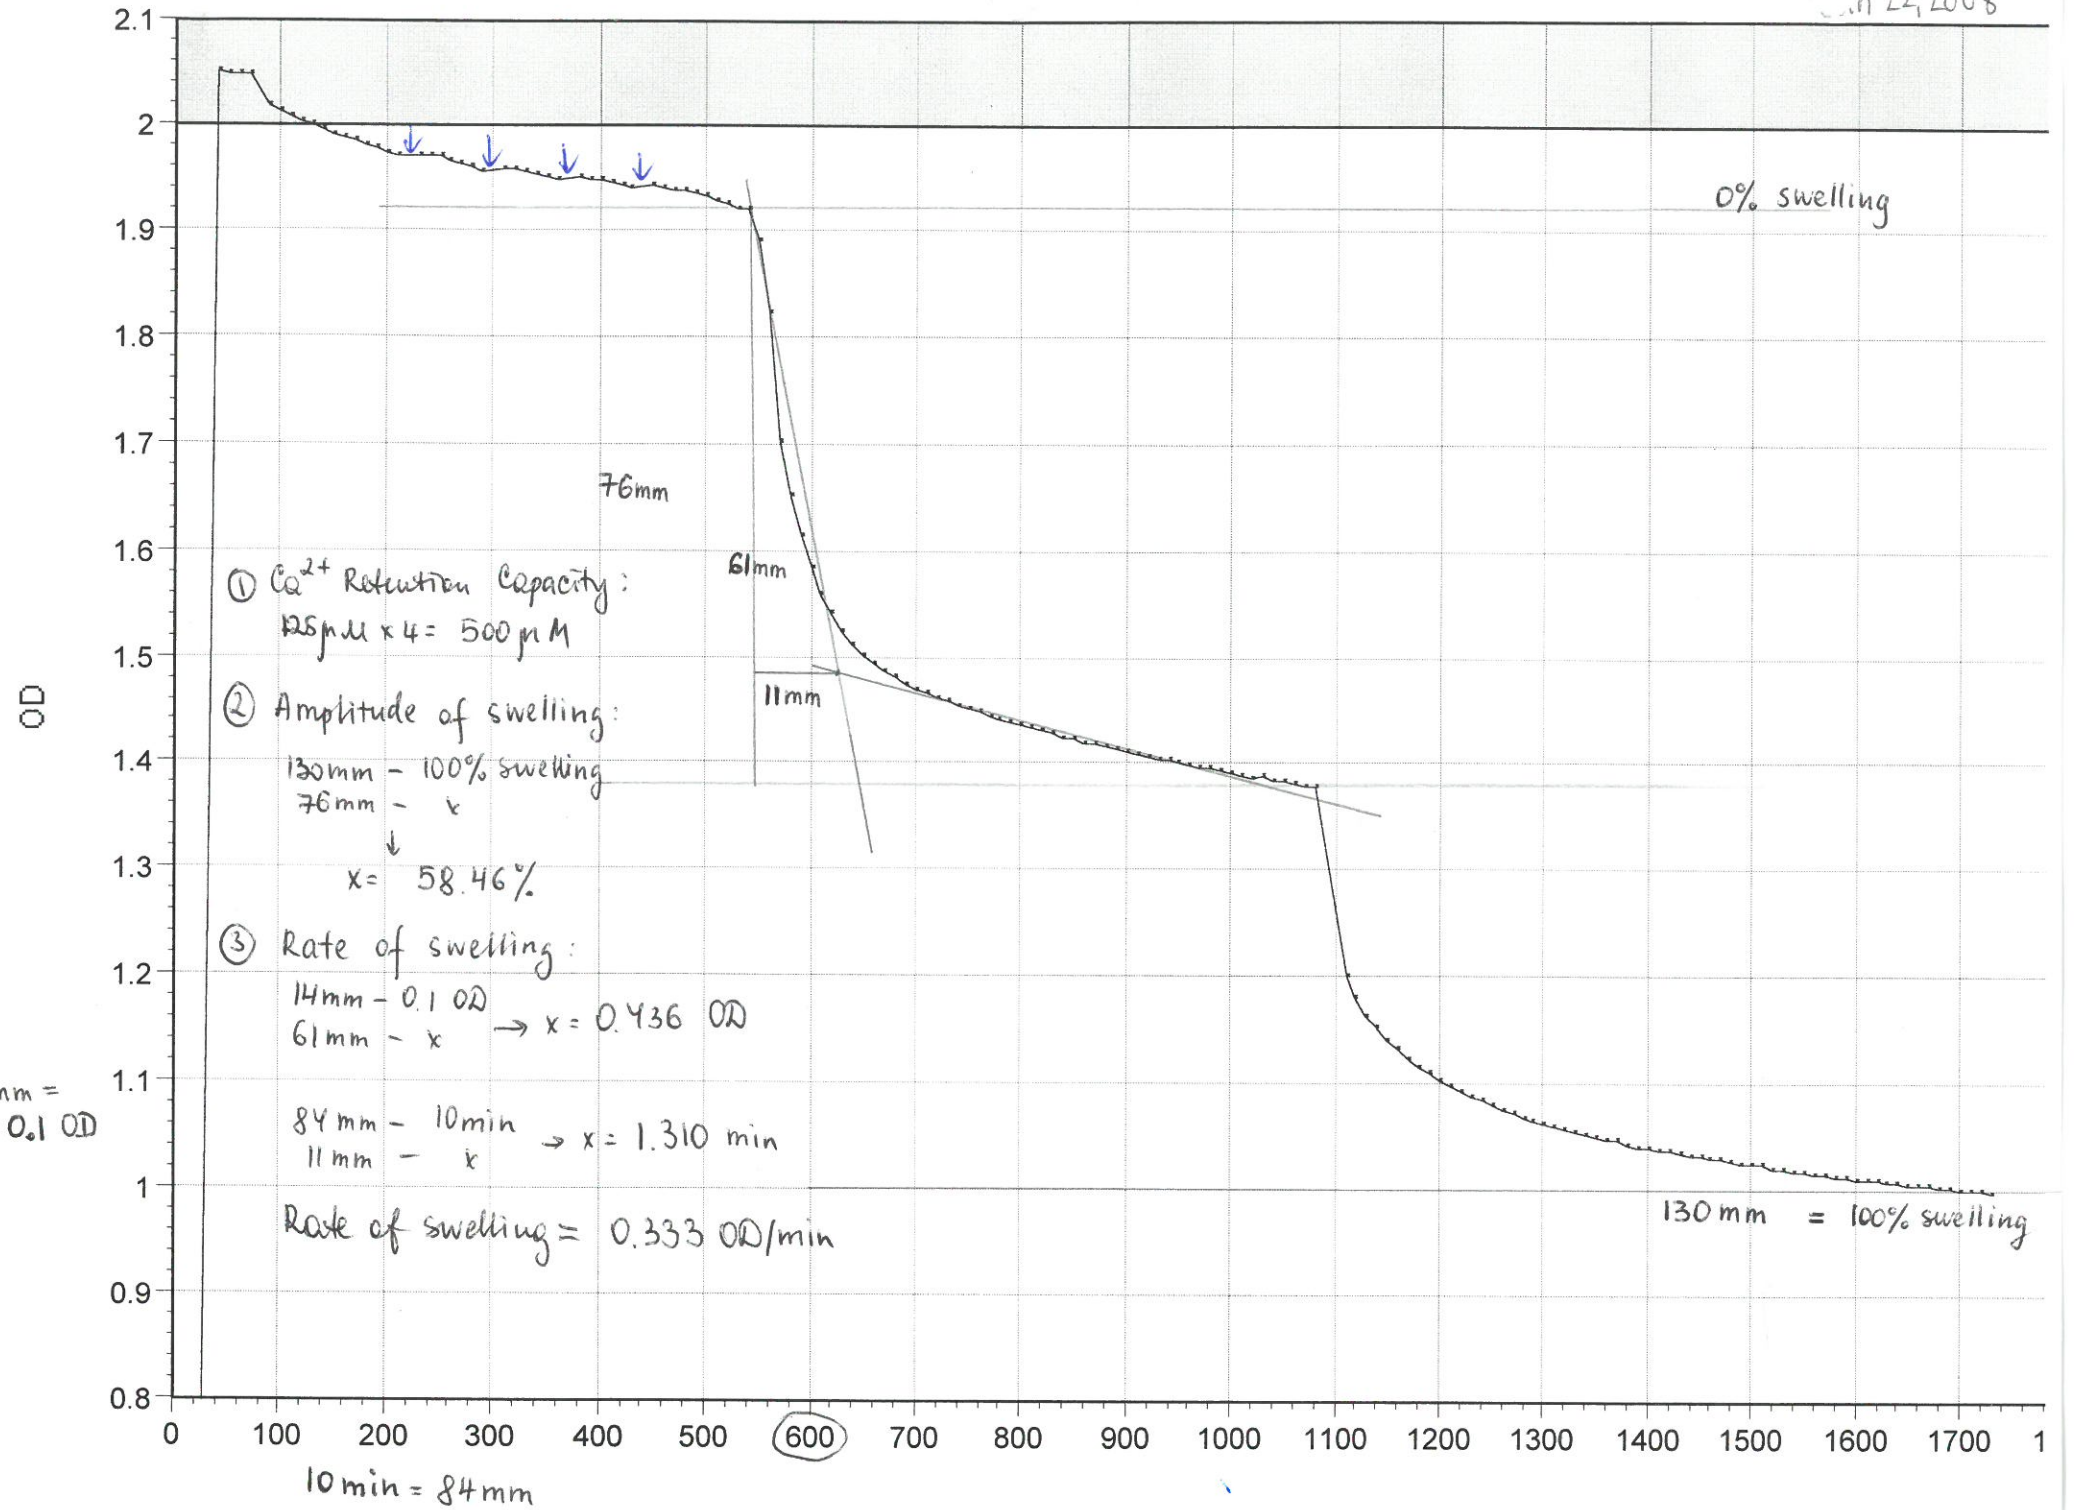



LIVER

ADP + Oligo + FGF2  $\rightarrow$  50 mM  $\text{Ca}^{2+}$   
(x 10)

liver

AZ (RLM)  
Jul 22, 2008

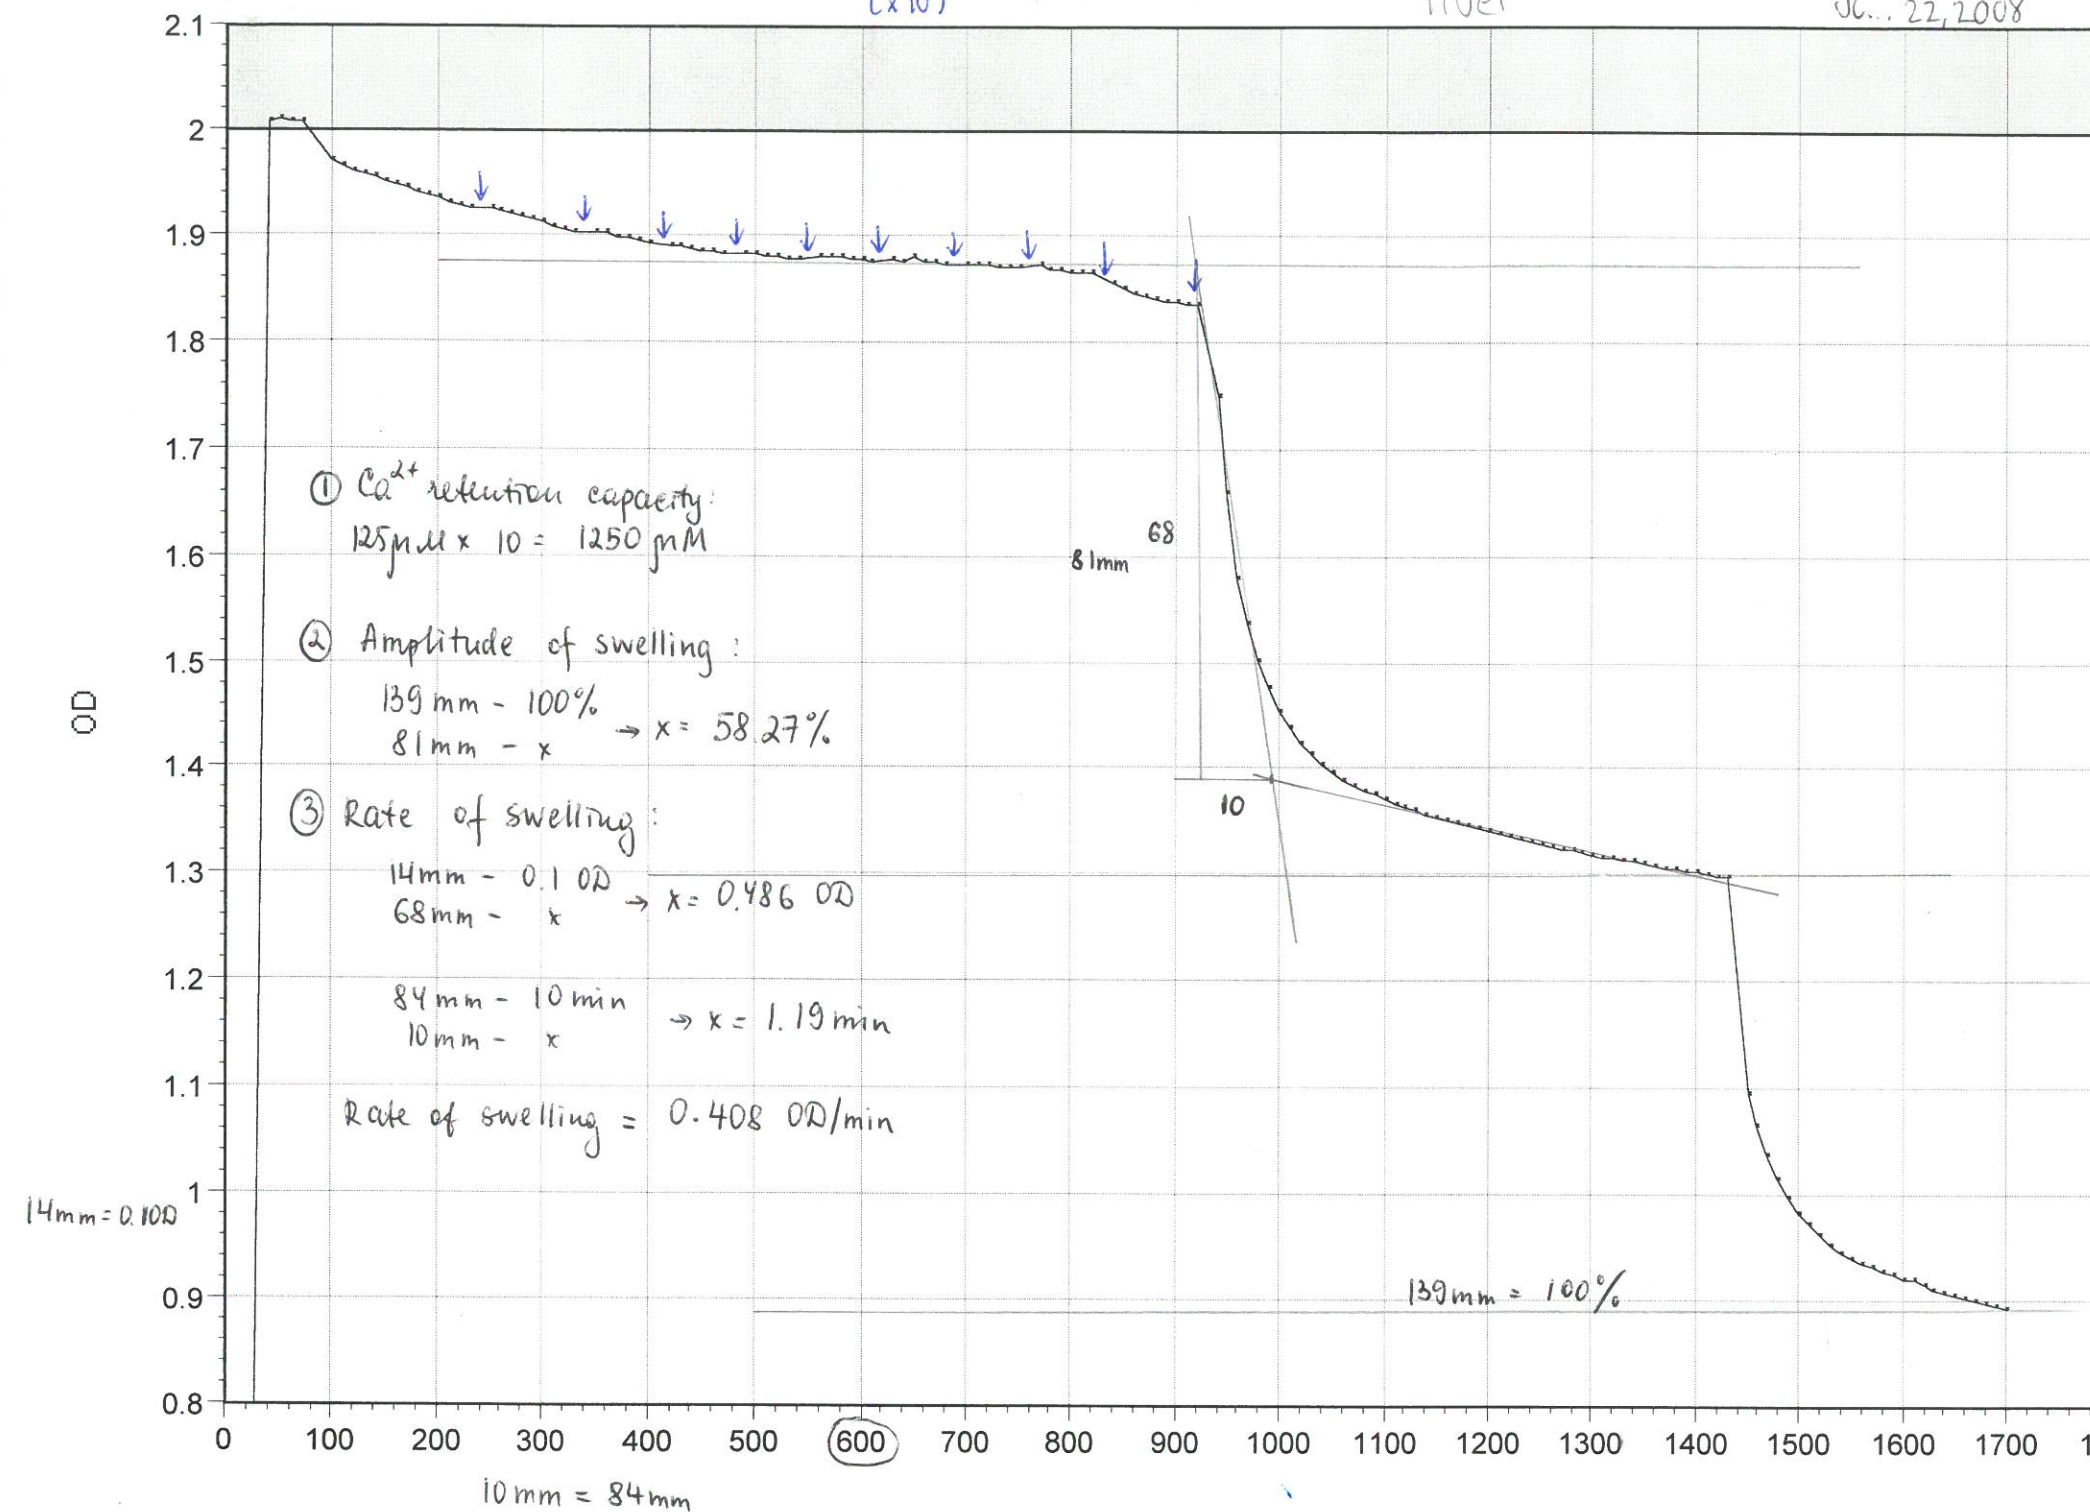



LIVER

ADP + Oligo + FGF2 + PKC<sub>ε</sub> inhibitor → 50 mM Ca<sup>2+</sup> (x5)

liver

#3 (RLM)  
22, 2008

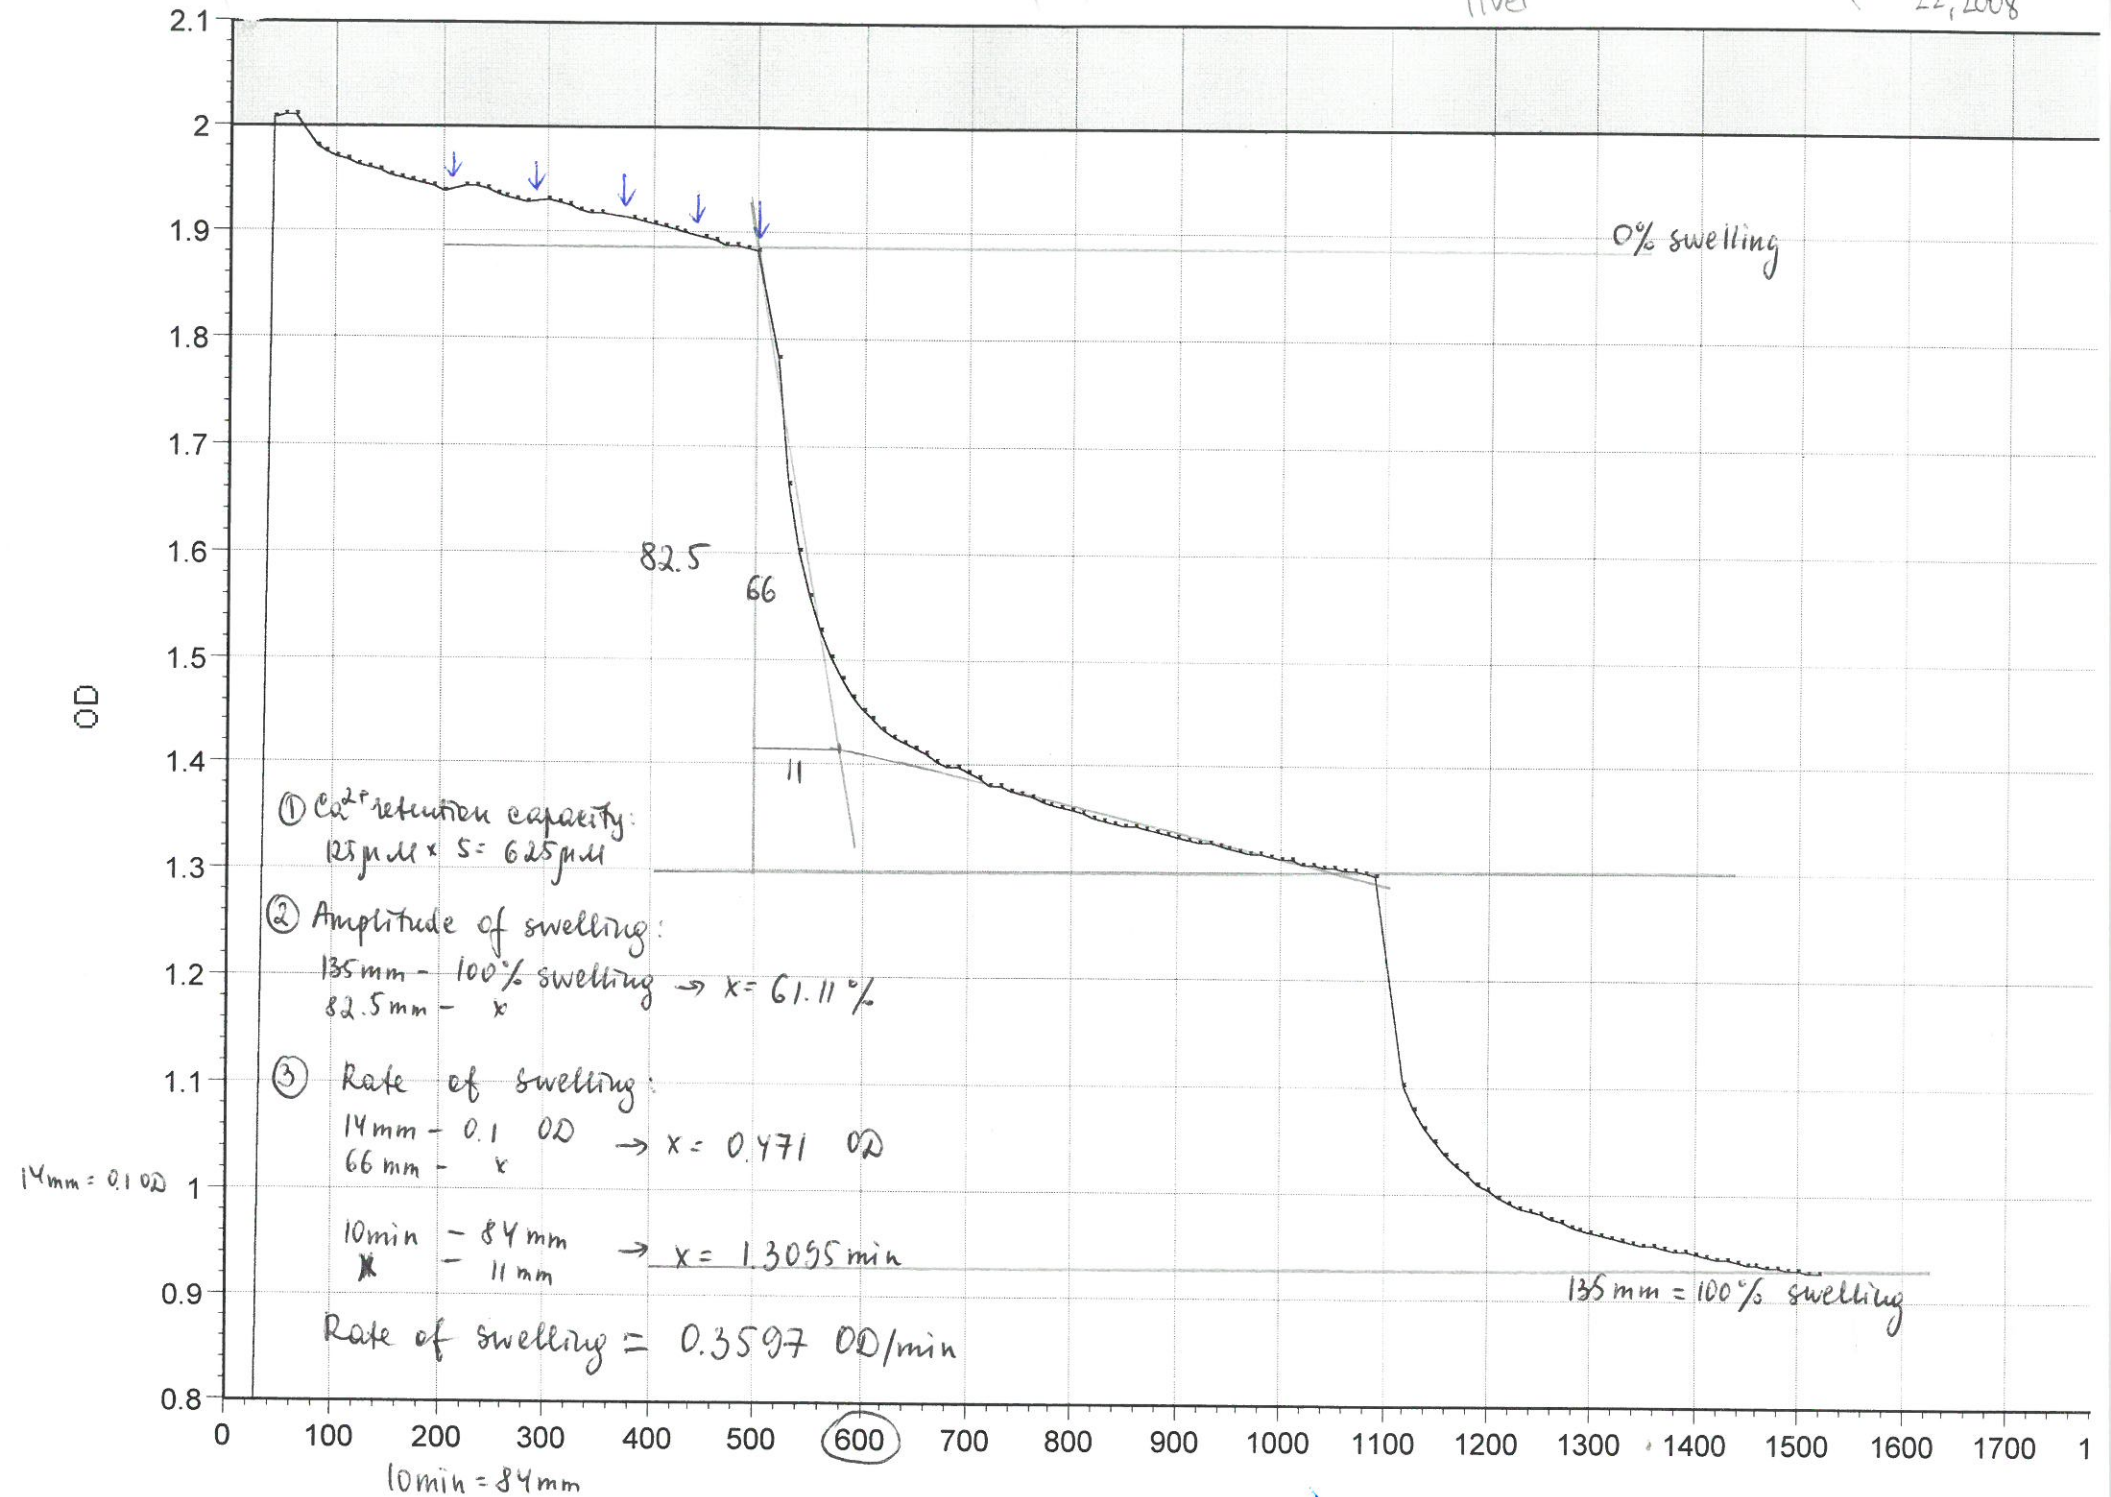

LIVER

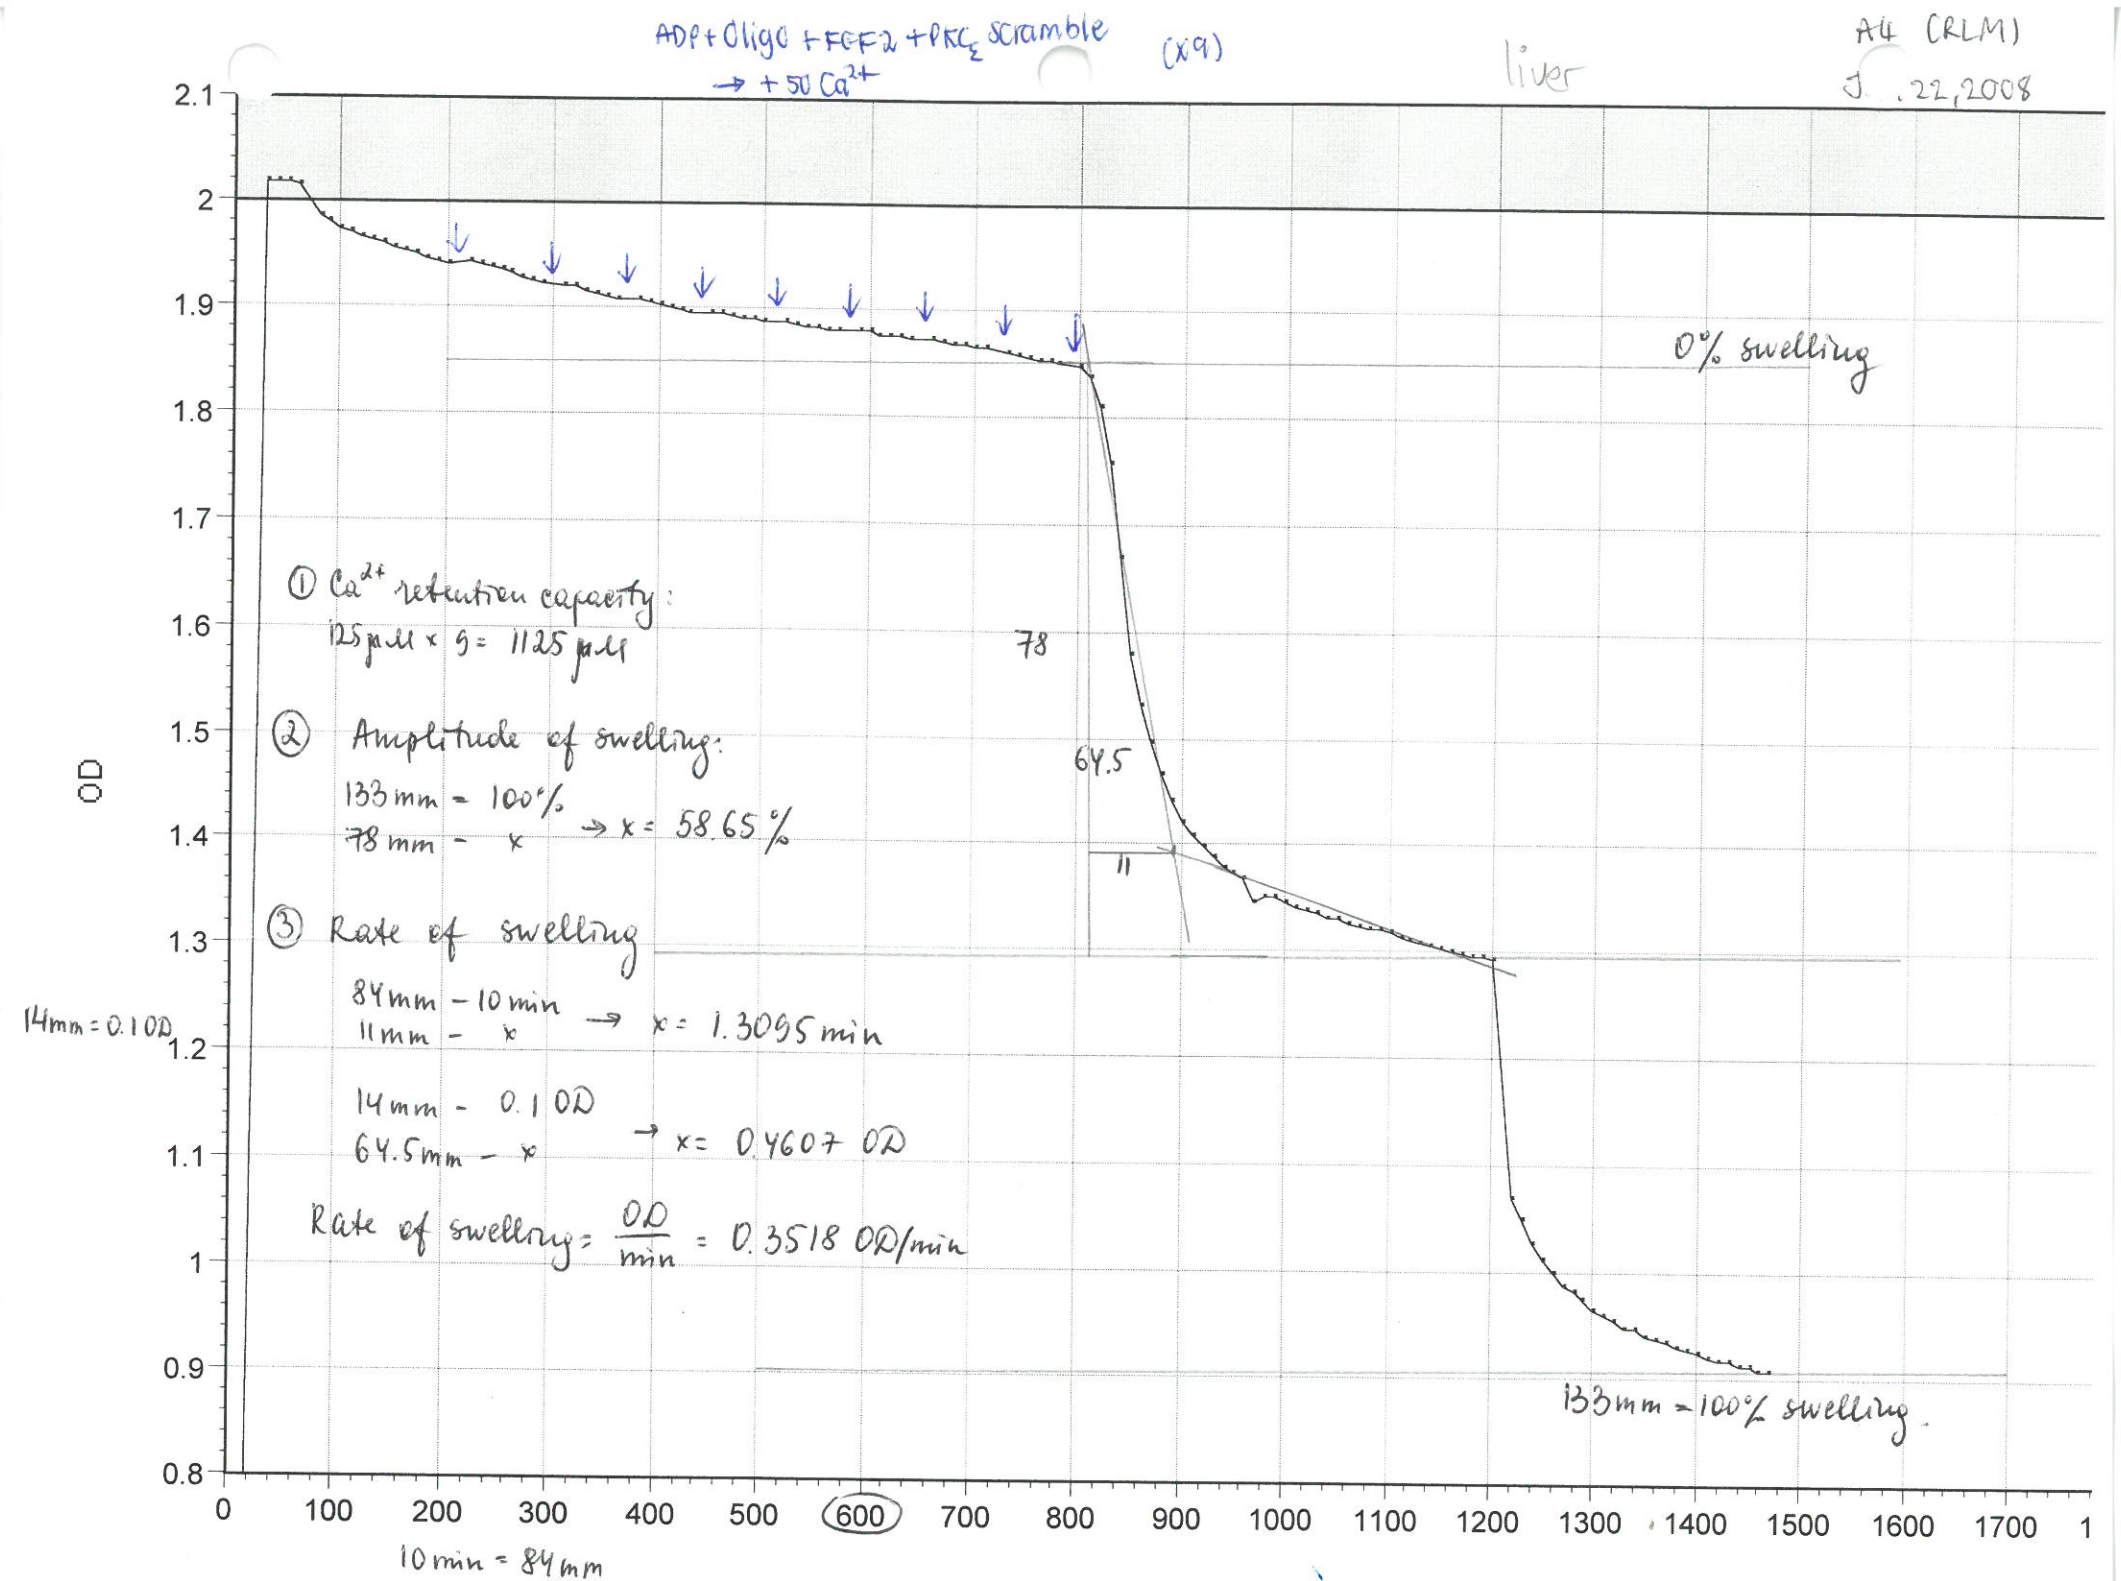

LIVER

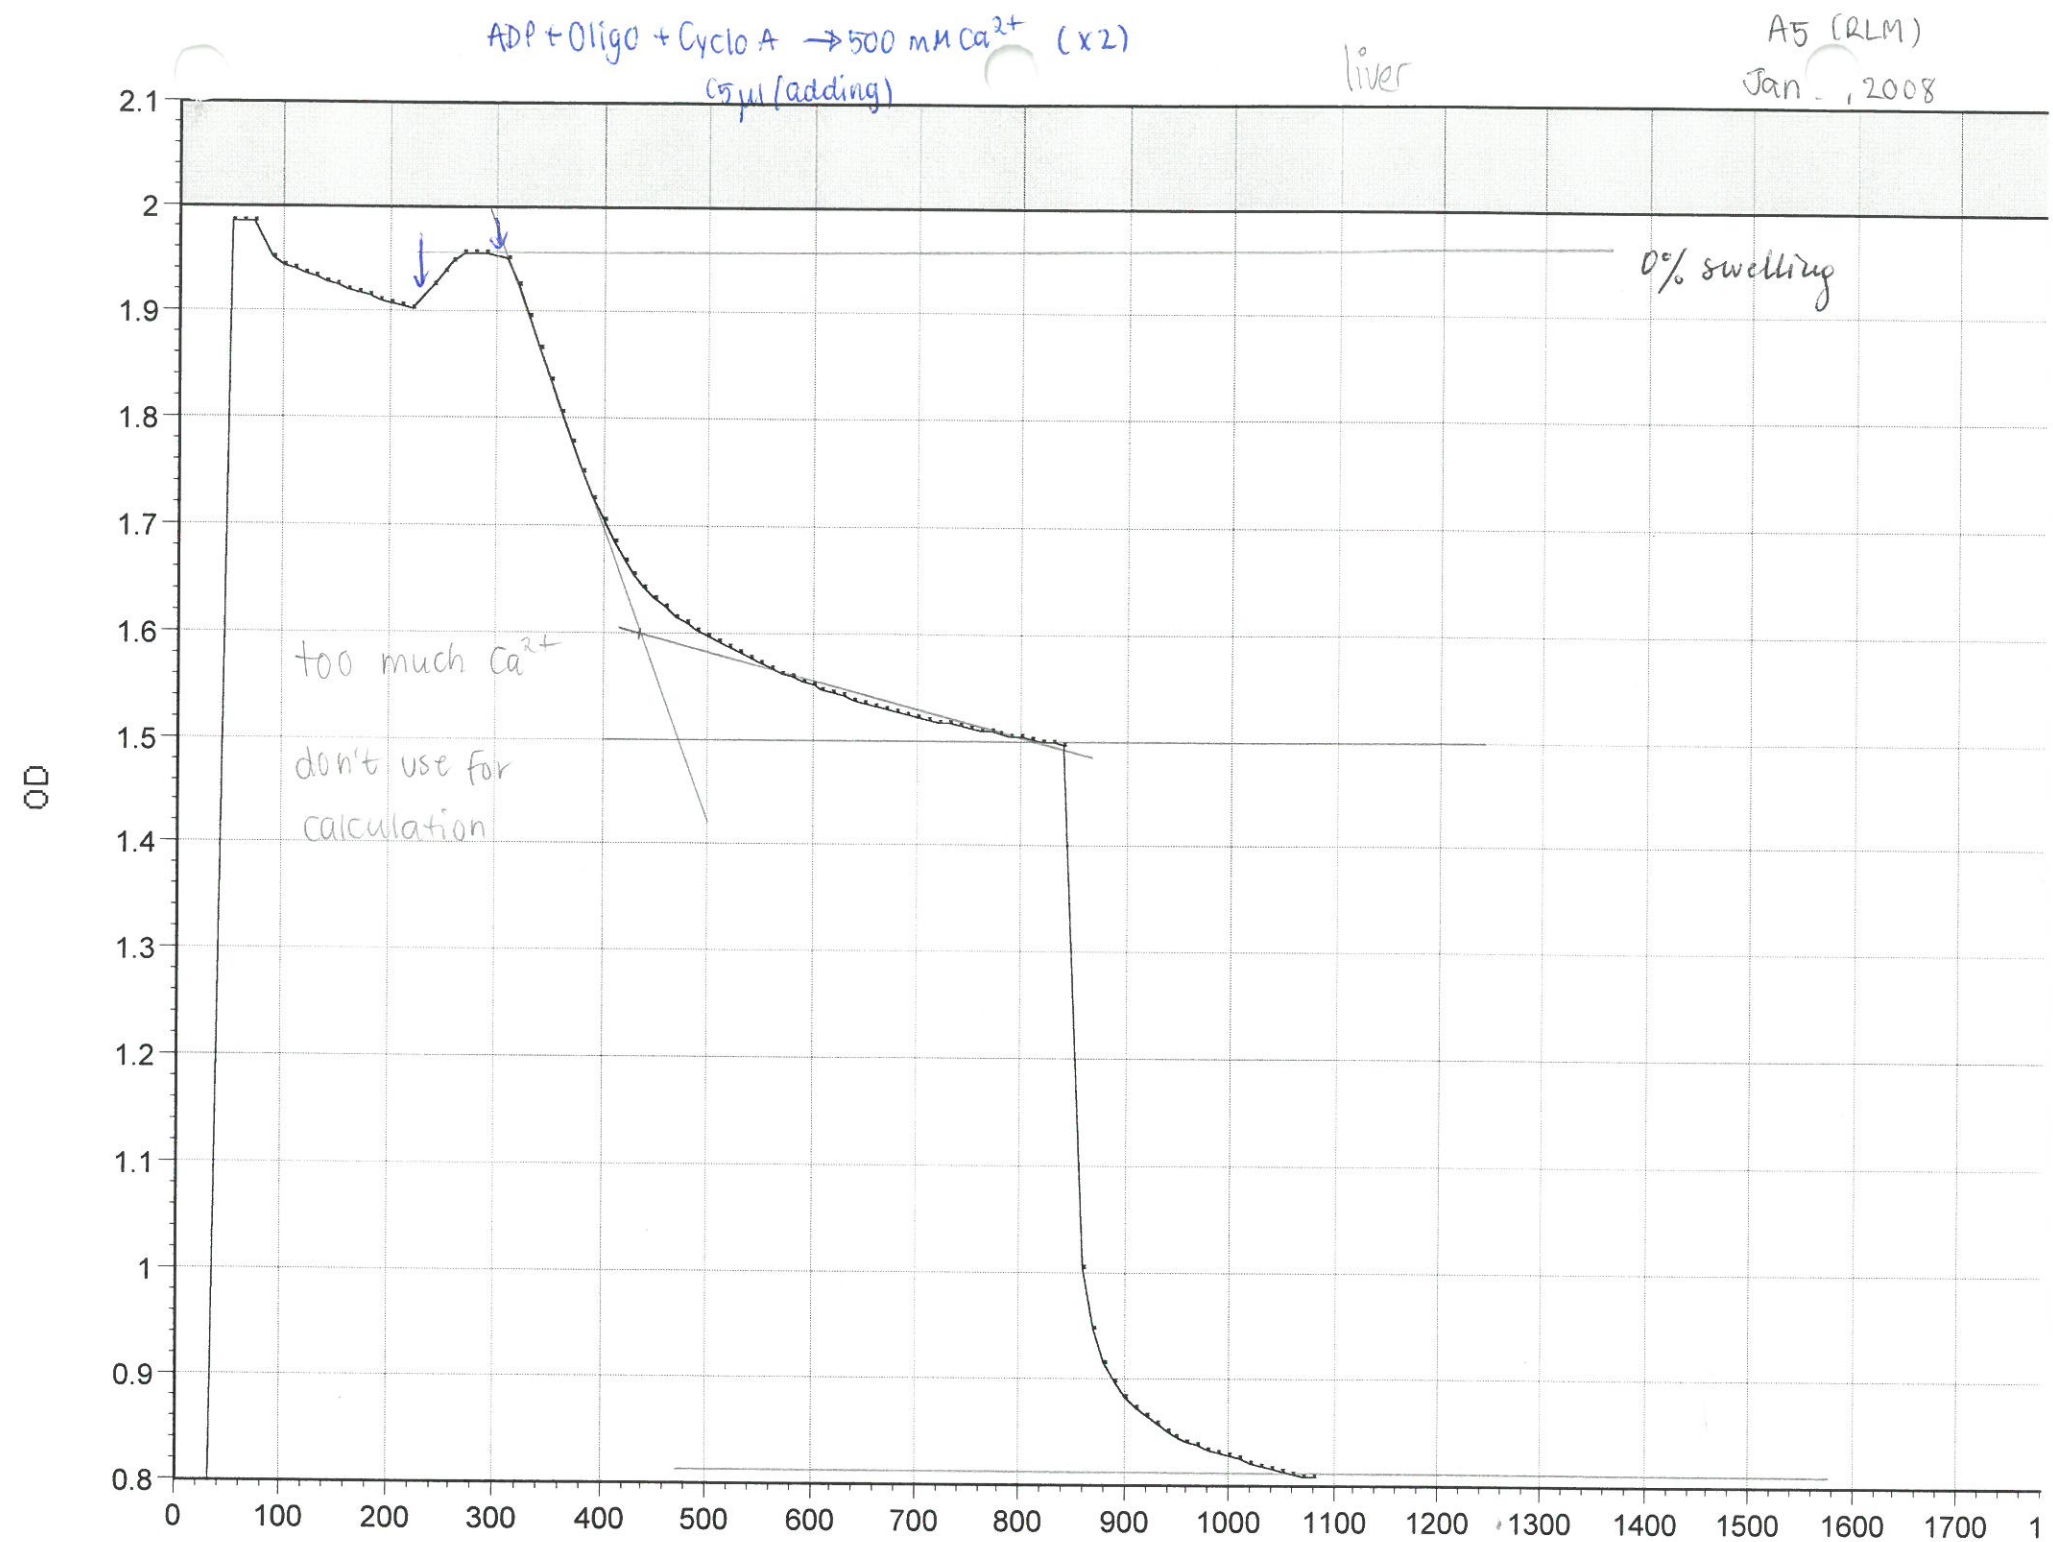



ADP + Oligo + Cyclo A  $\rightarrow$  250 mM  $\text{Ca}^{2+}$  (X<sup>-</sup>)  
(5  $\mu\text{l}$  / adding)

liver

Ab (RLM)  
n 22, 2008

LIVER

OD

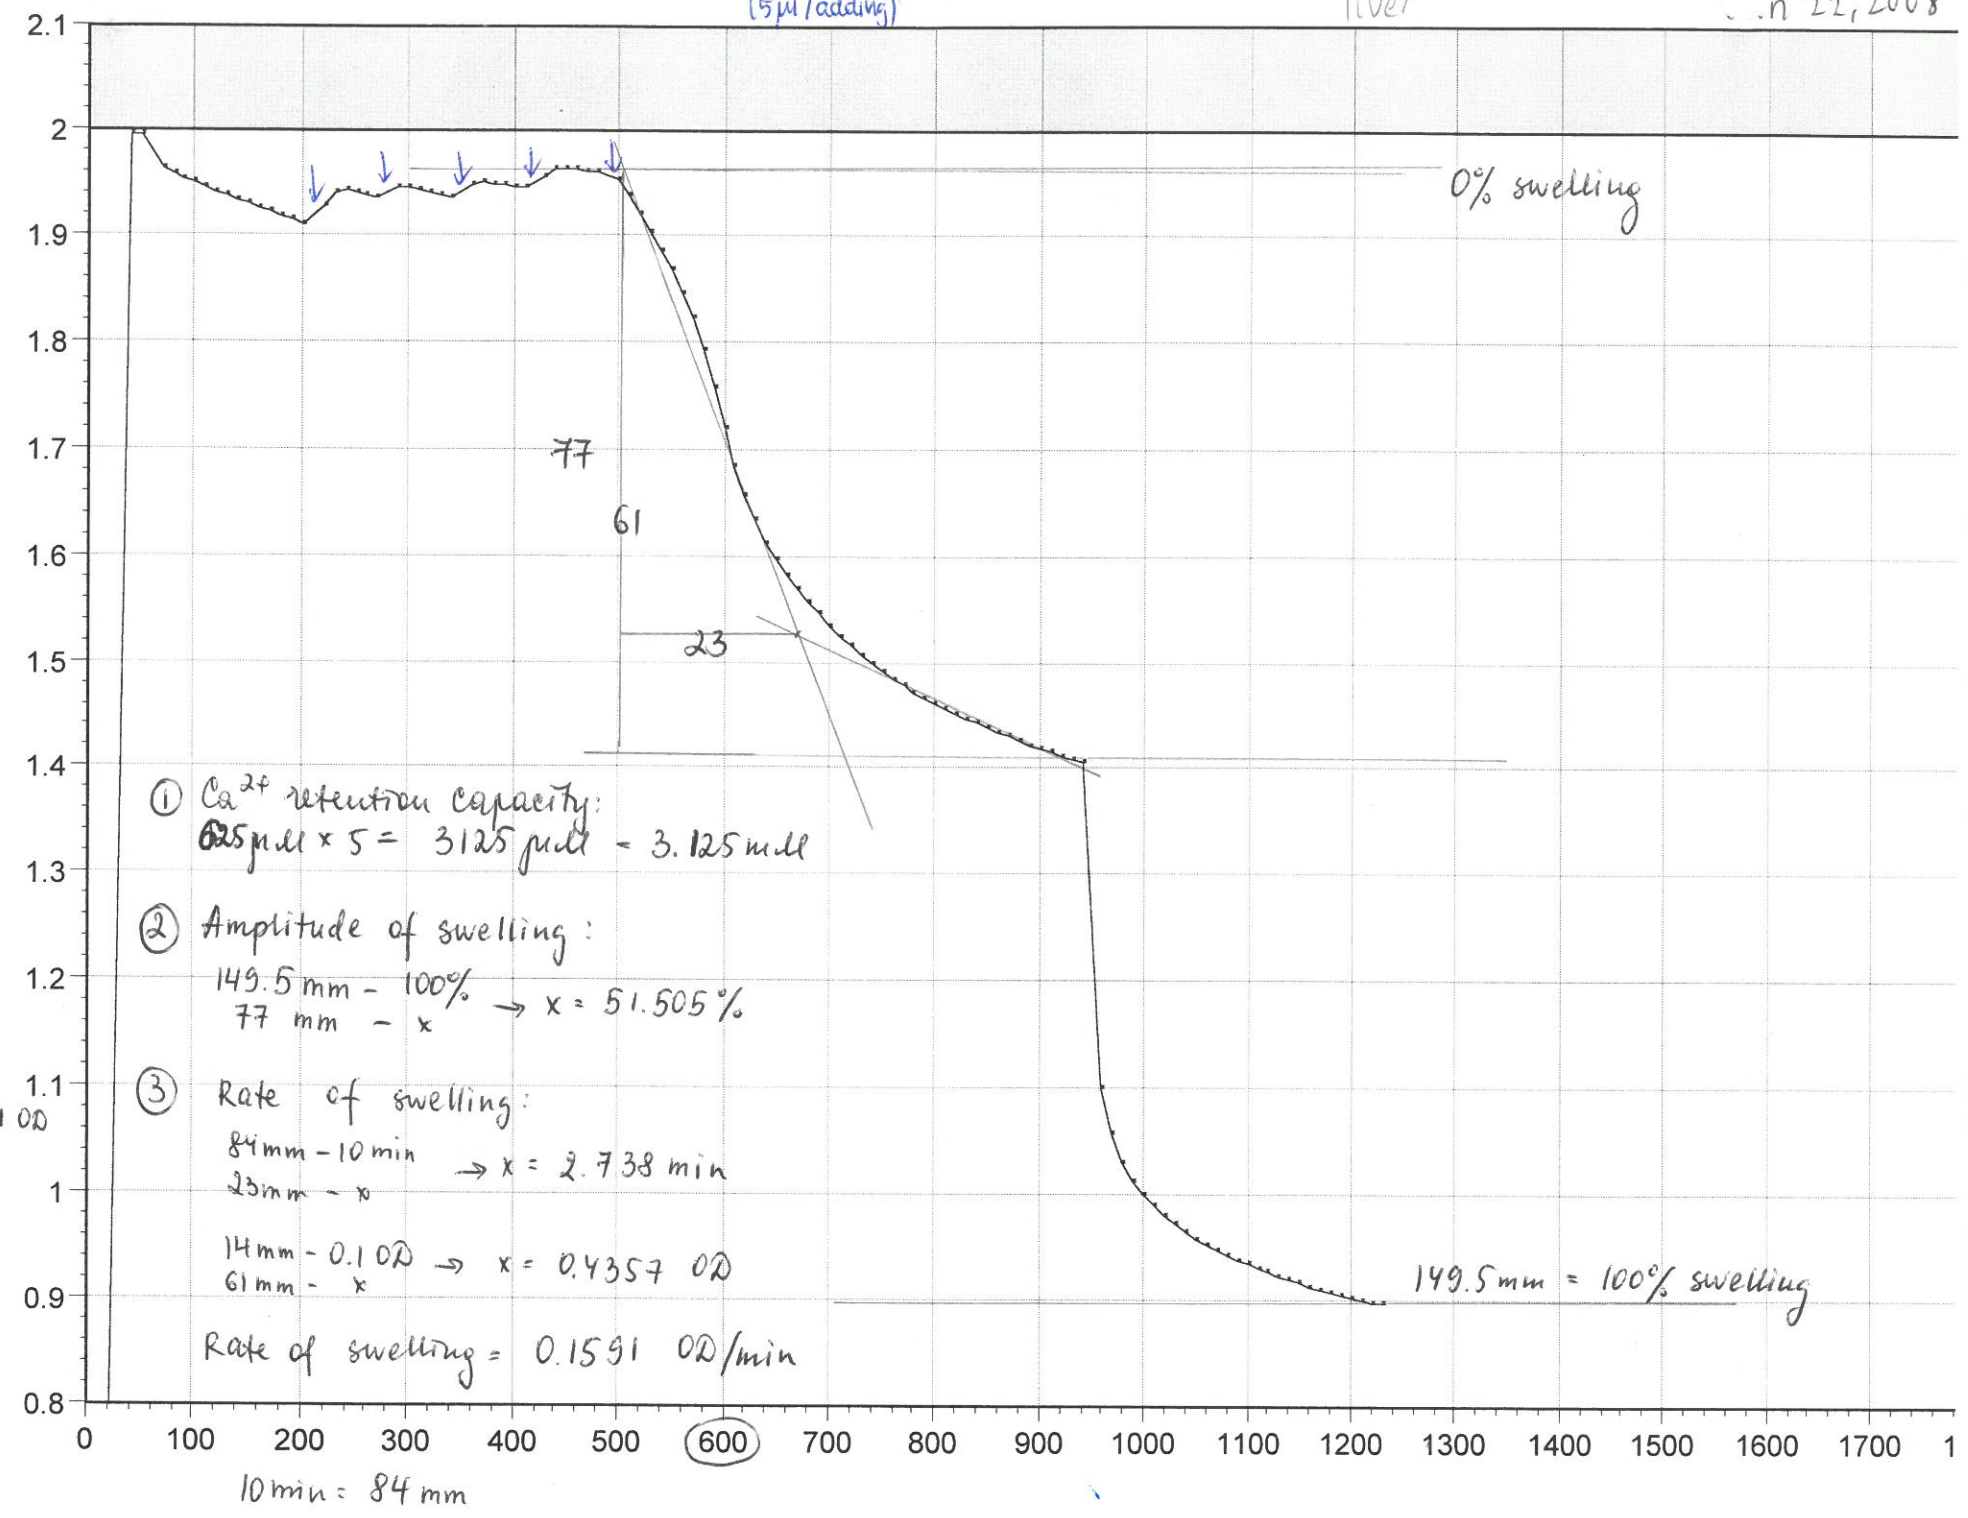

LIVER

ADP + Oligo + Cyclo A + FGFA  $\rightarrow$  250 mM  $Ca^{2+}$  (X5)  
(5  $\mu$ l/adding)

liver

A7 (RLM)  
22, 2008

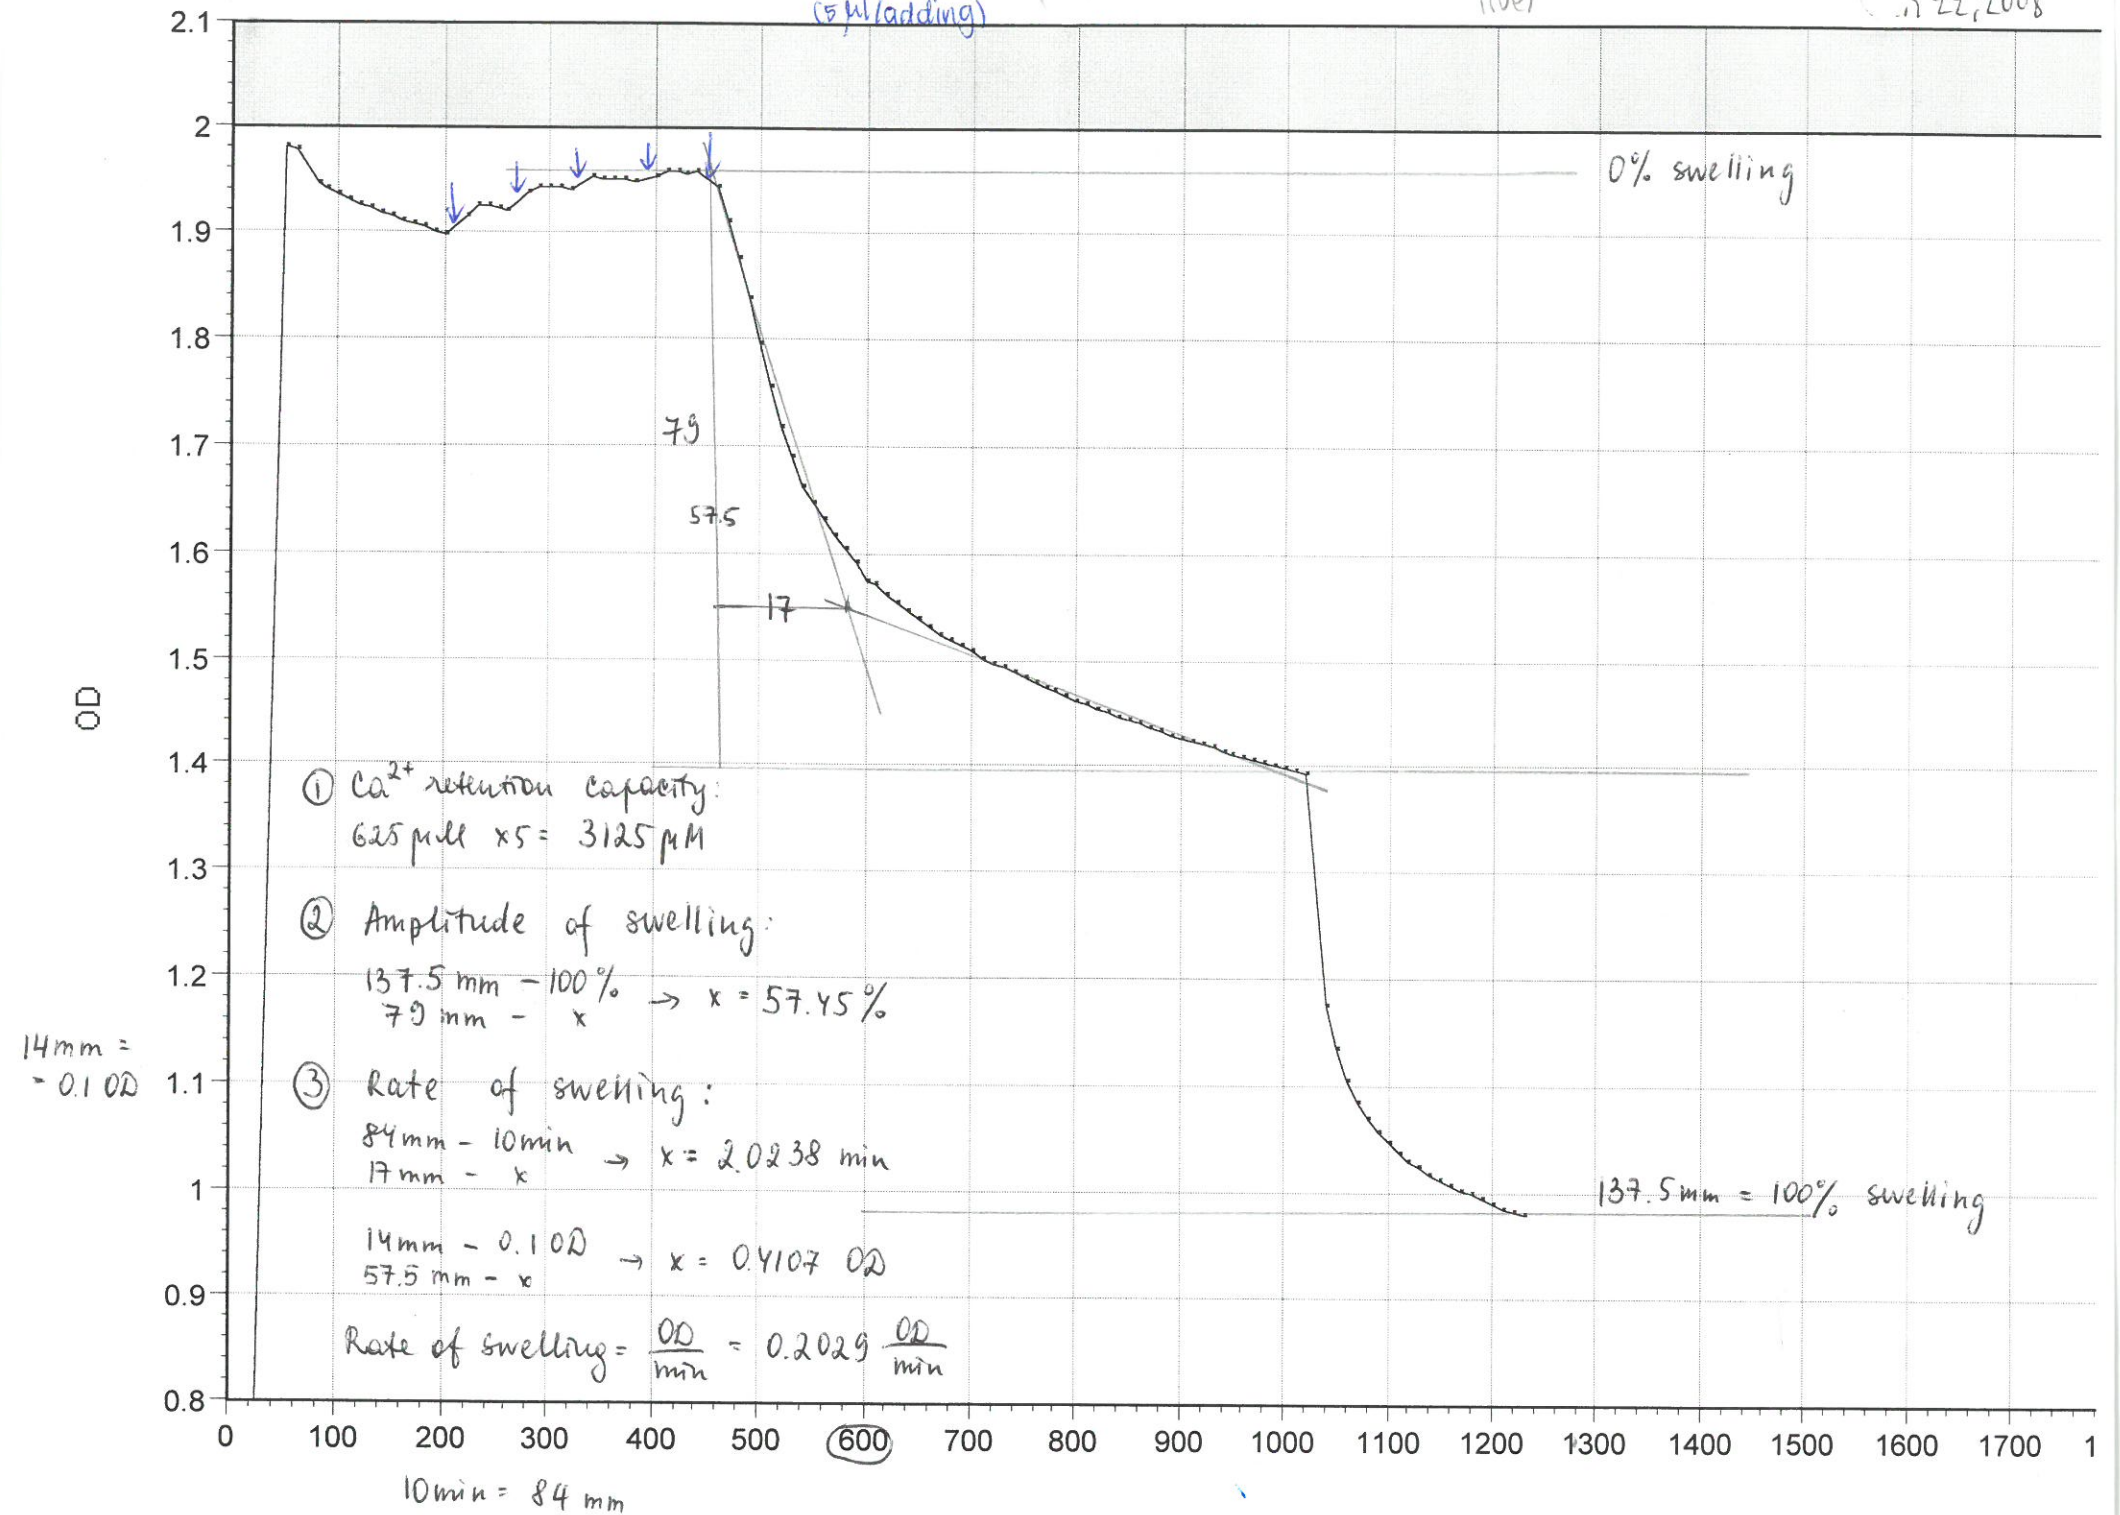

LIVER

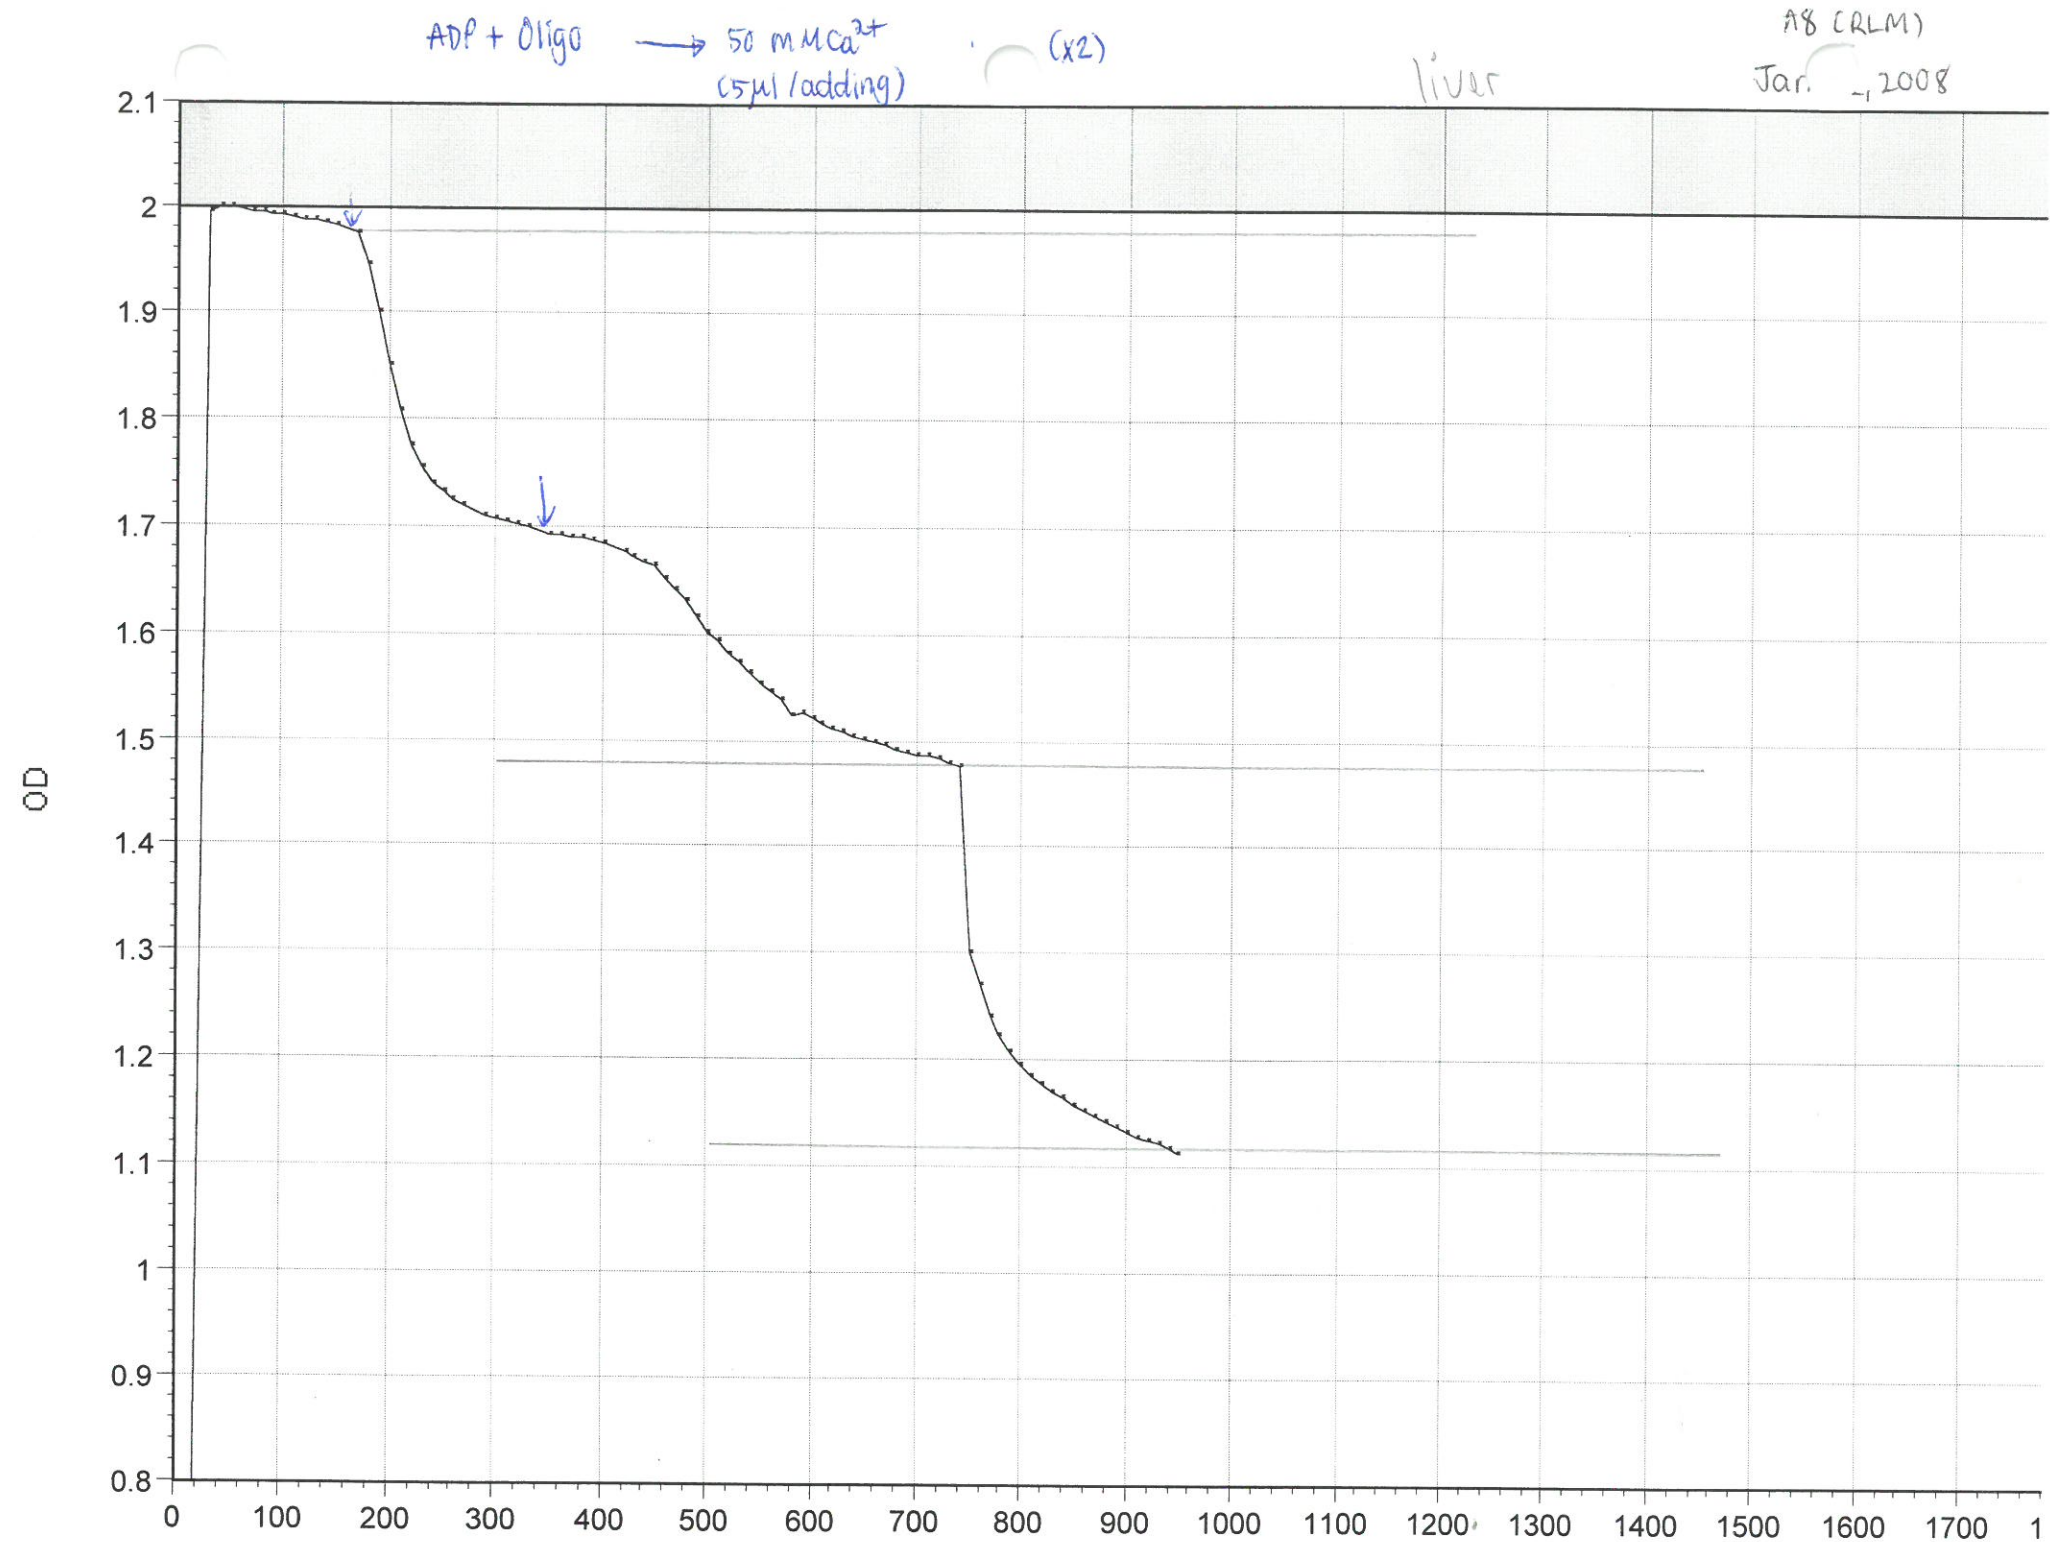



LIVER

ADP + Oligomycin  $\rightarrow$  50 mM  $\text{Ca}^{2+}$  (x)  
15  $\mu\text{l}$  / add)

liver

A1 (RLM)  
Jan 25, 20

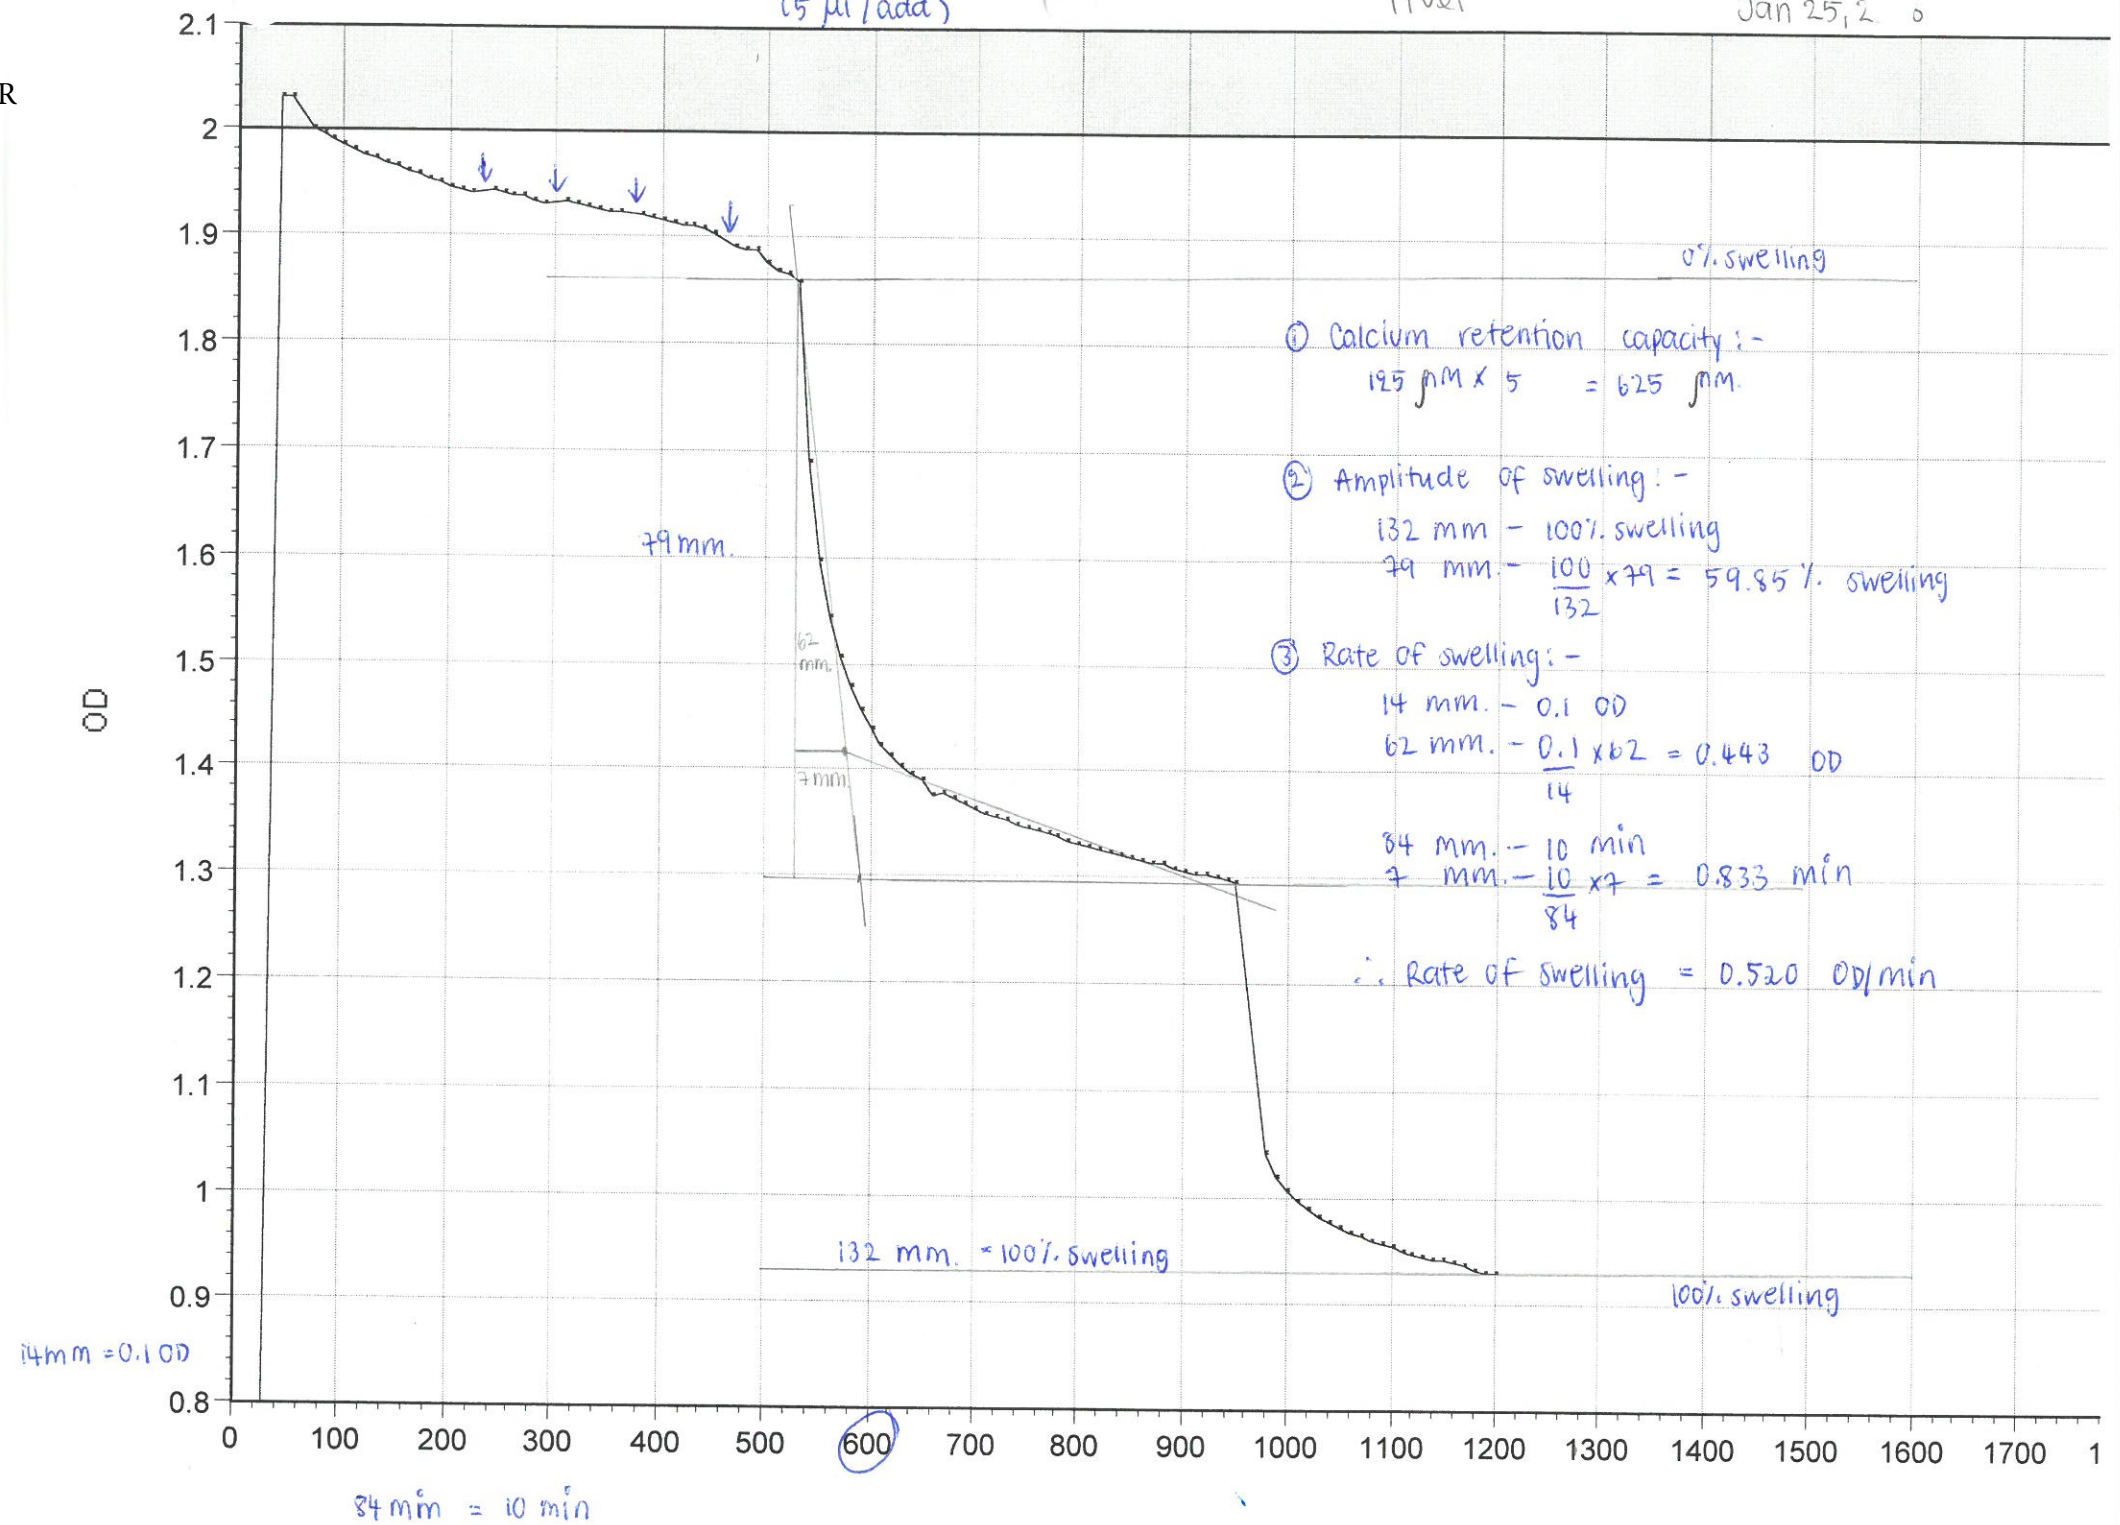

LIVER

ADP + Oligomycin + FBF2 → 50 mM Ca<sup>2+</sup> (5 μl/adding)

liver

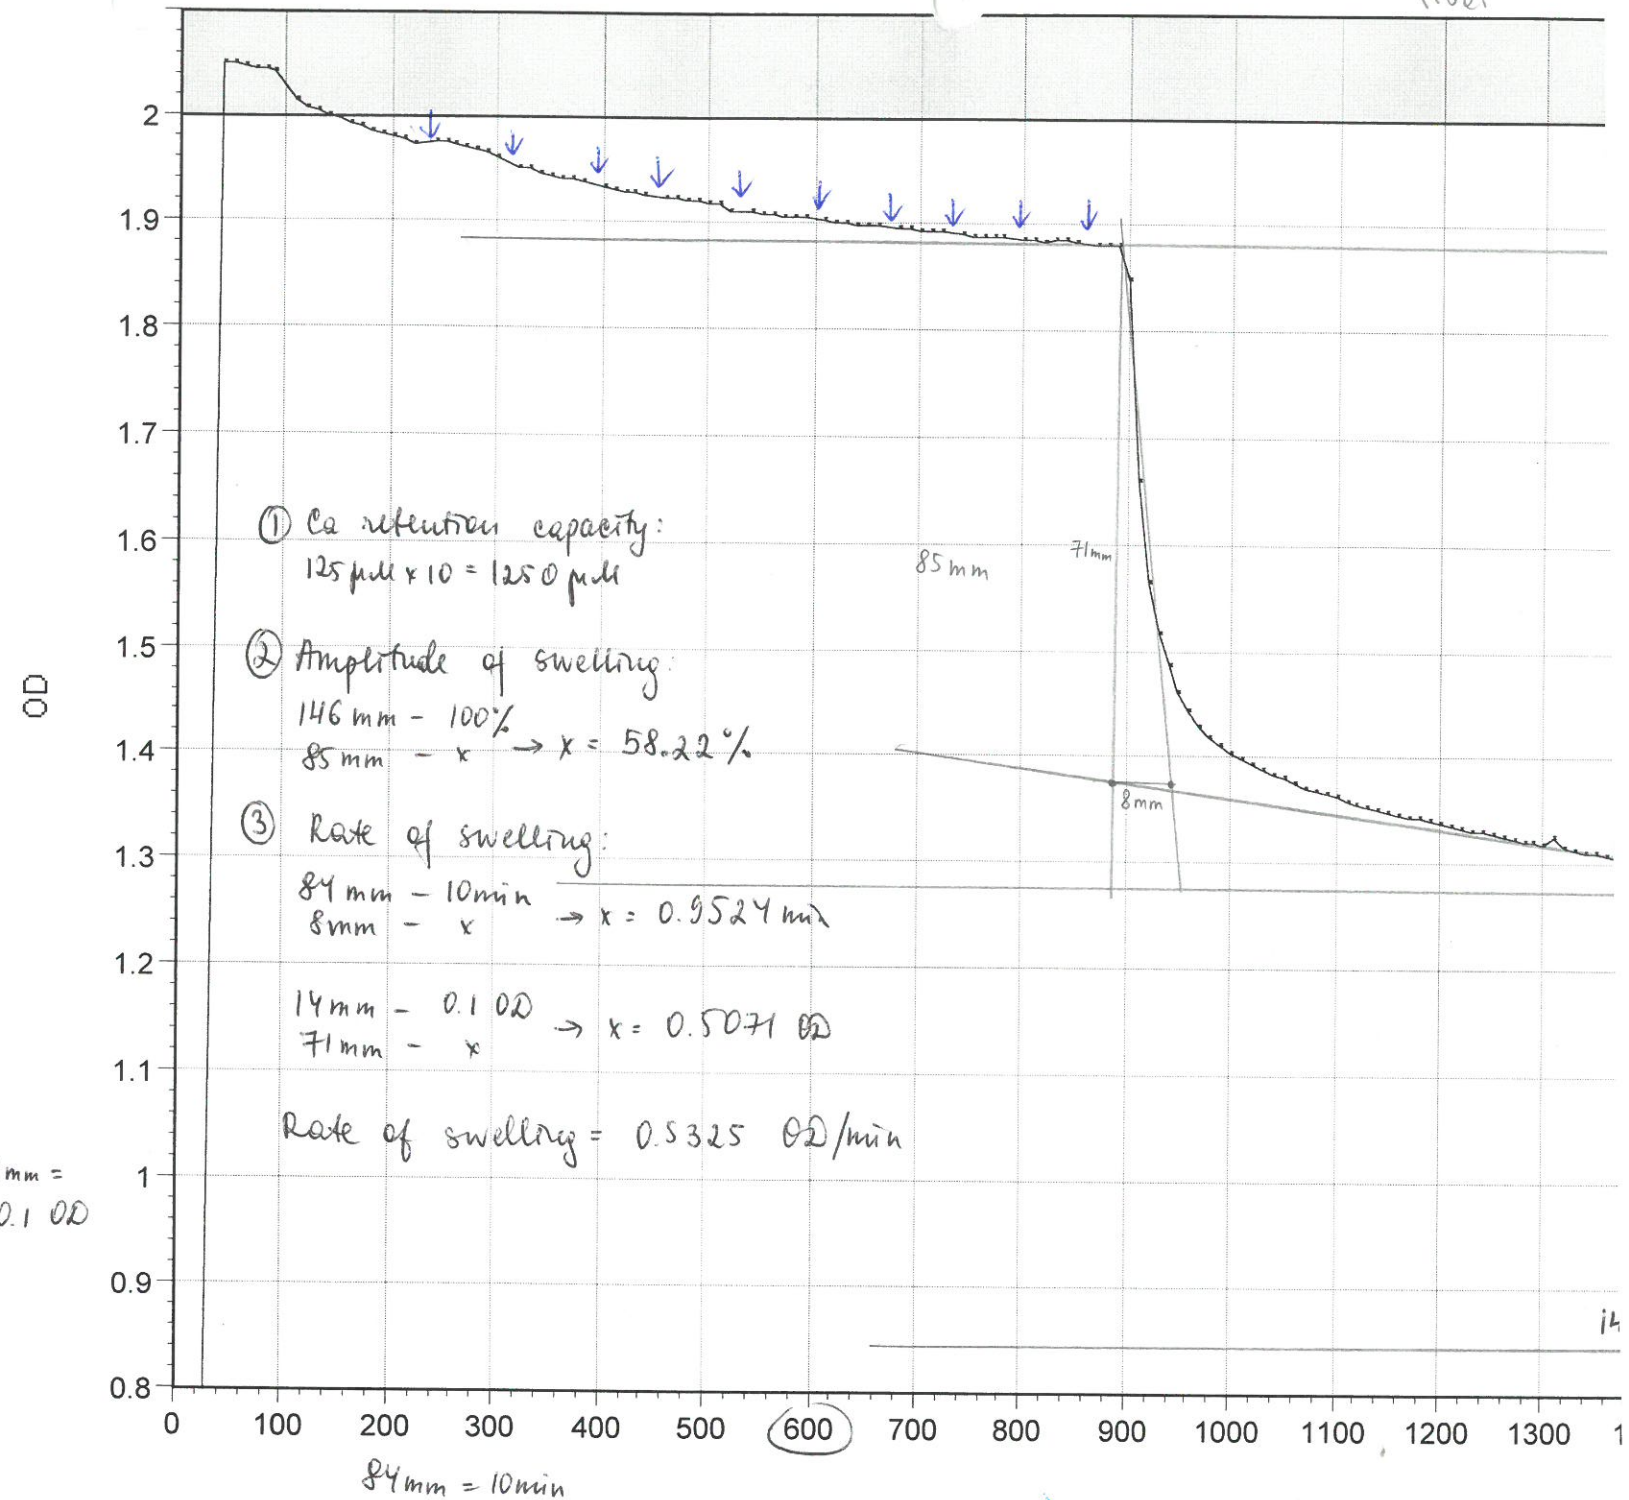



(RLM) Jan 25, 2008  
A2 + A3

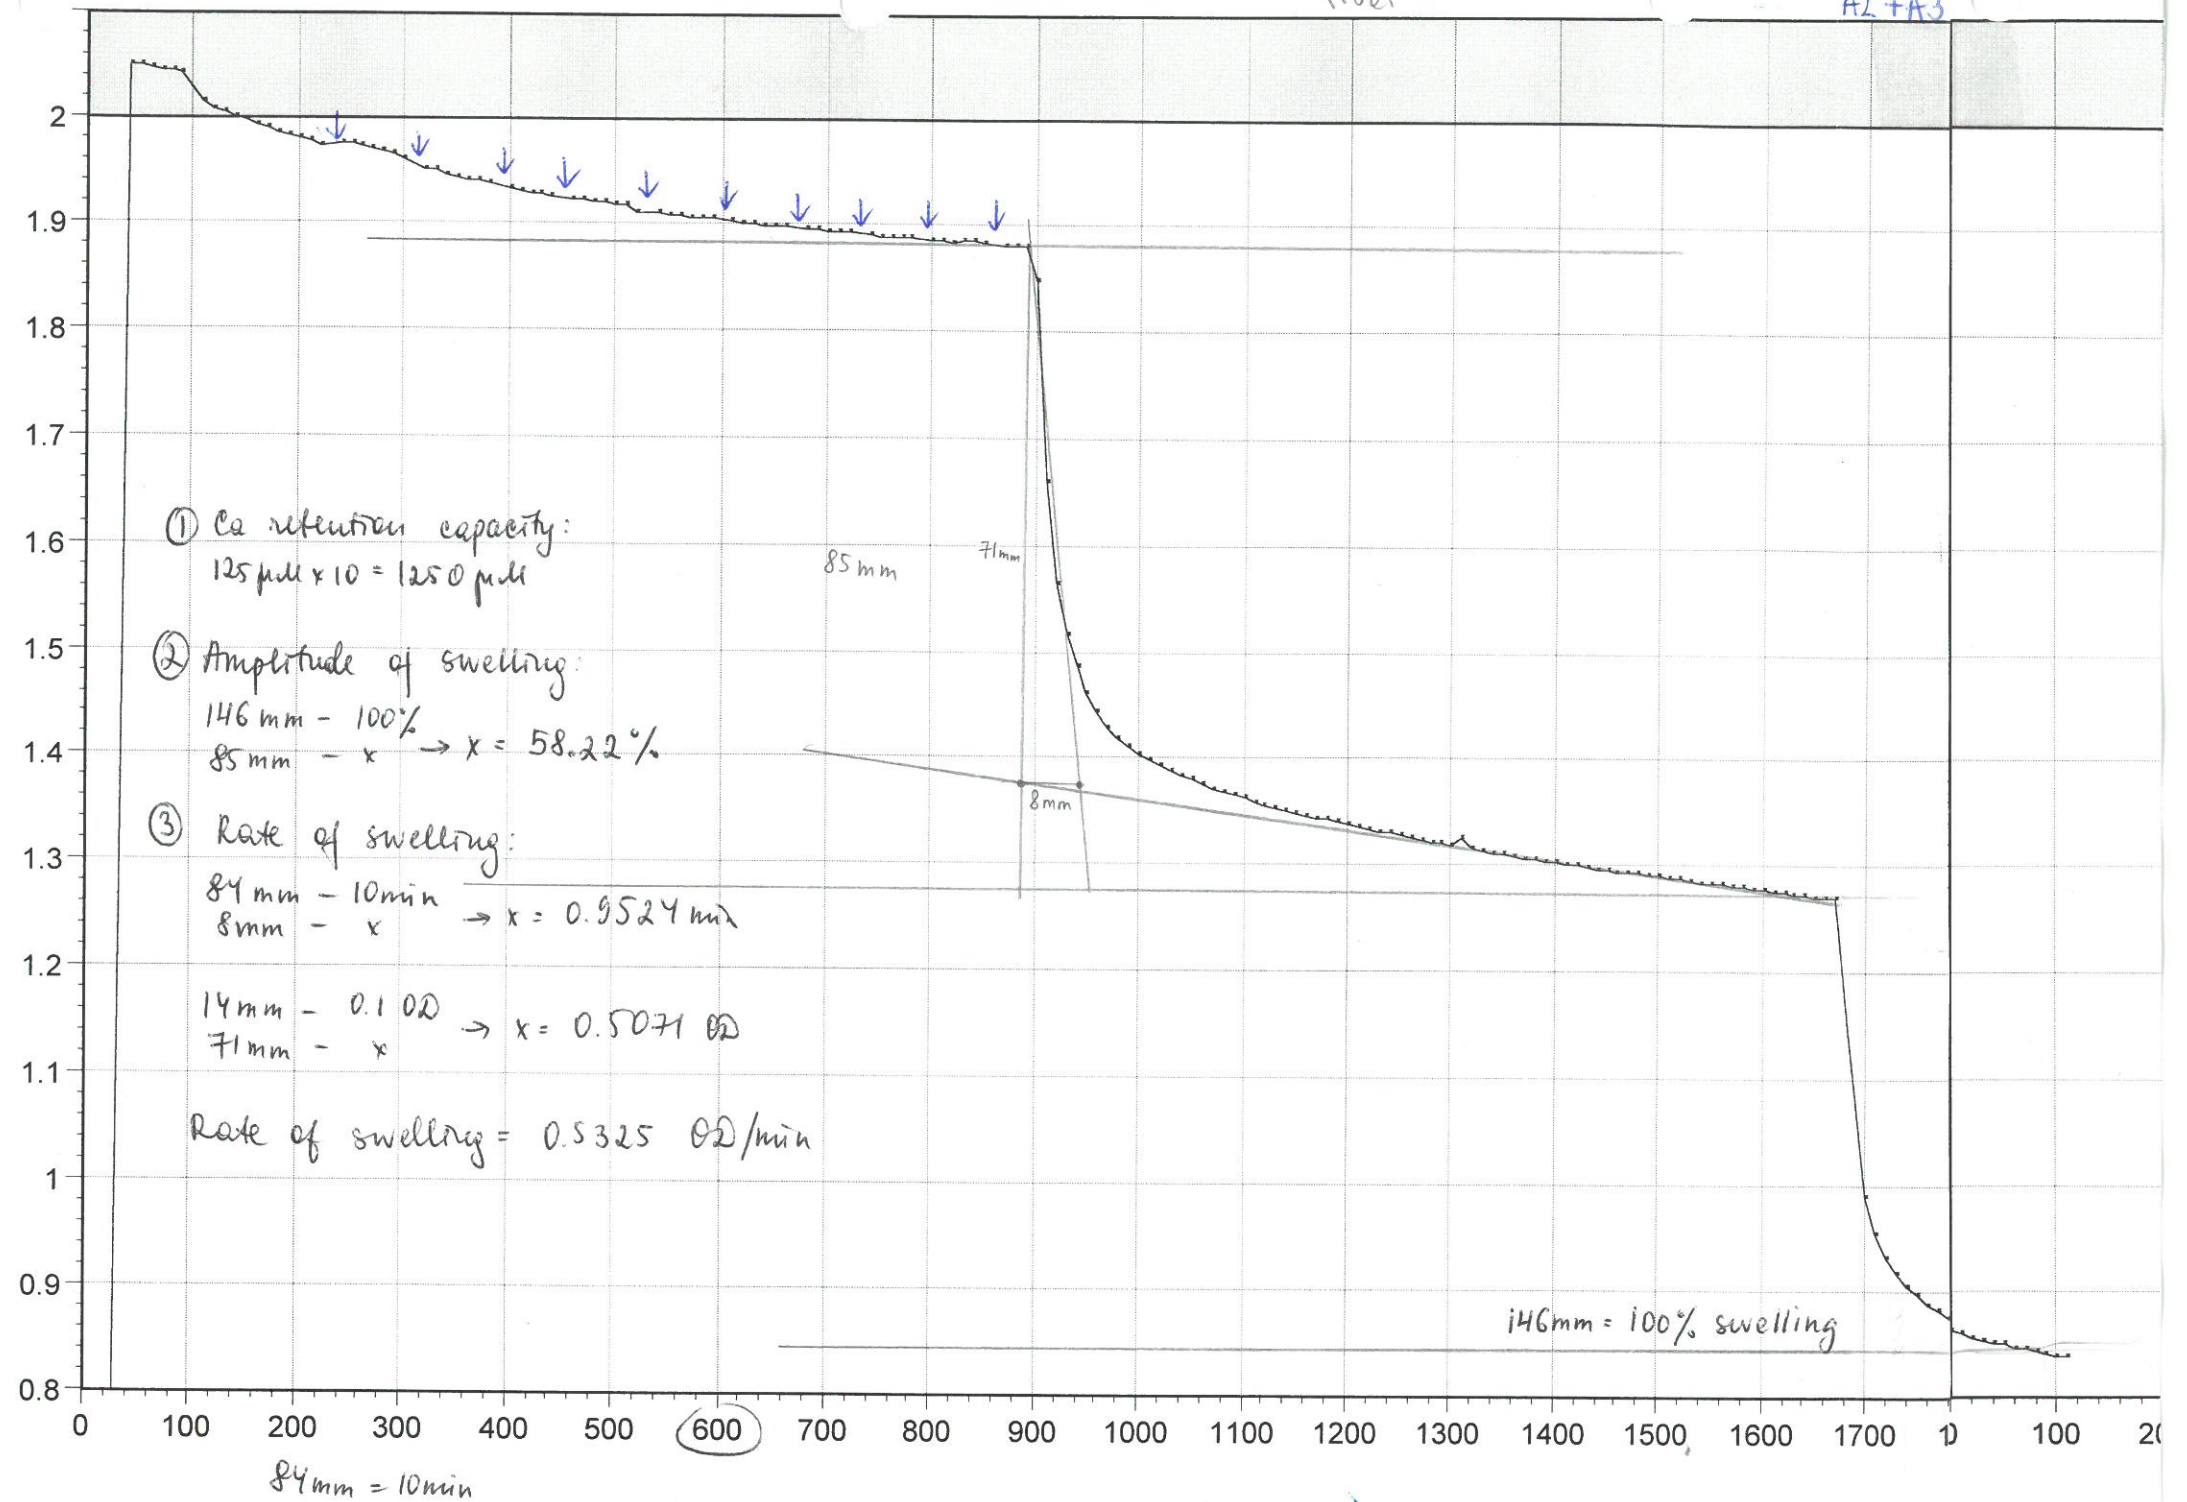

LIVER

ADP + Oligo + PGE<sub>2</sub> + PKC<sub>2</sub> inh.

50mM Ca

liver

A4 (RLM)

Jan 25, 2008

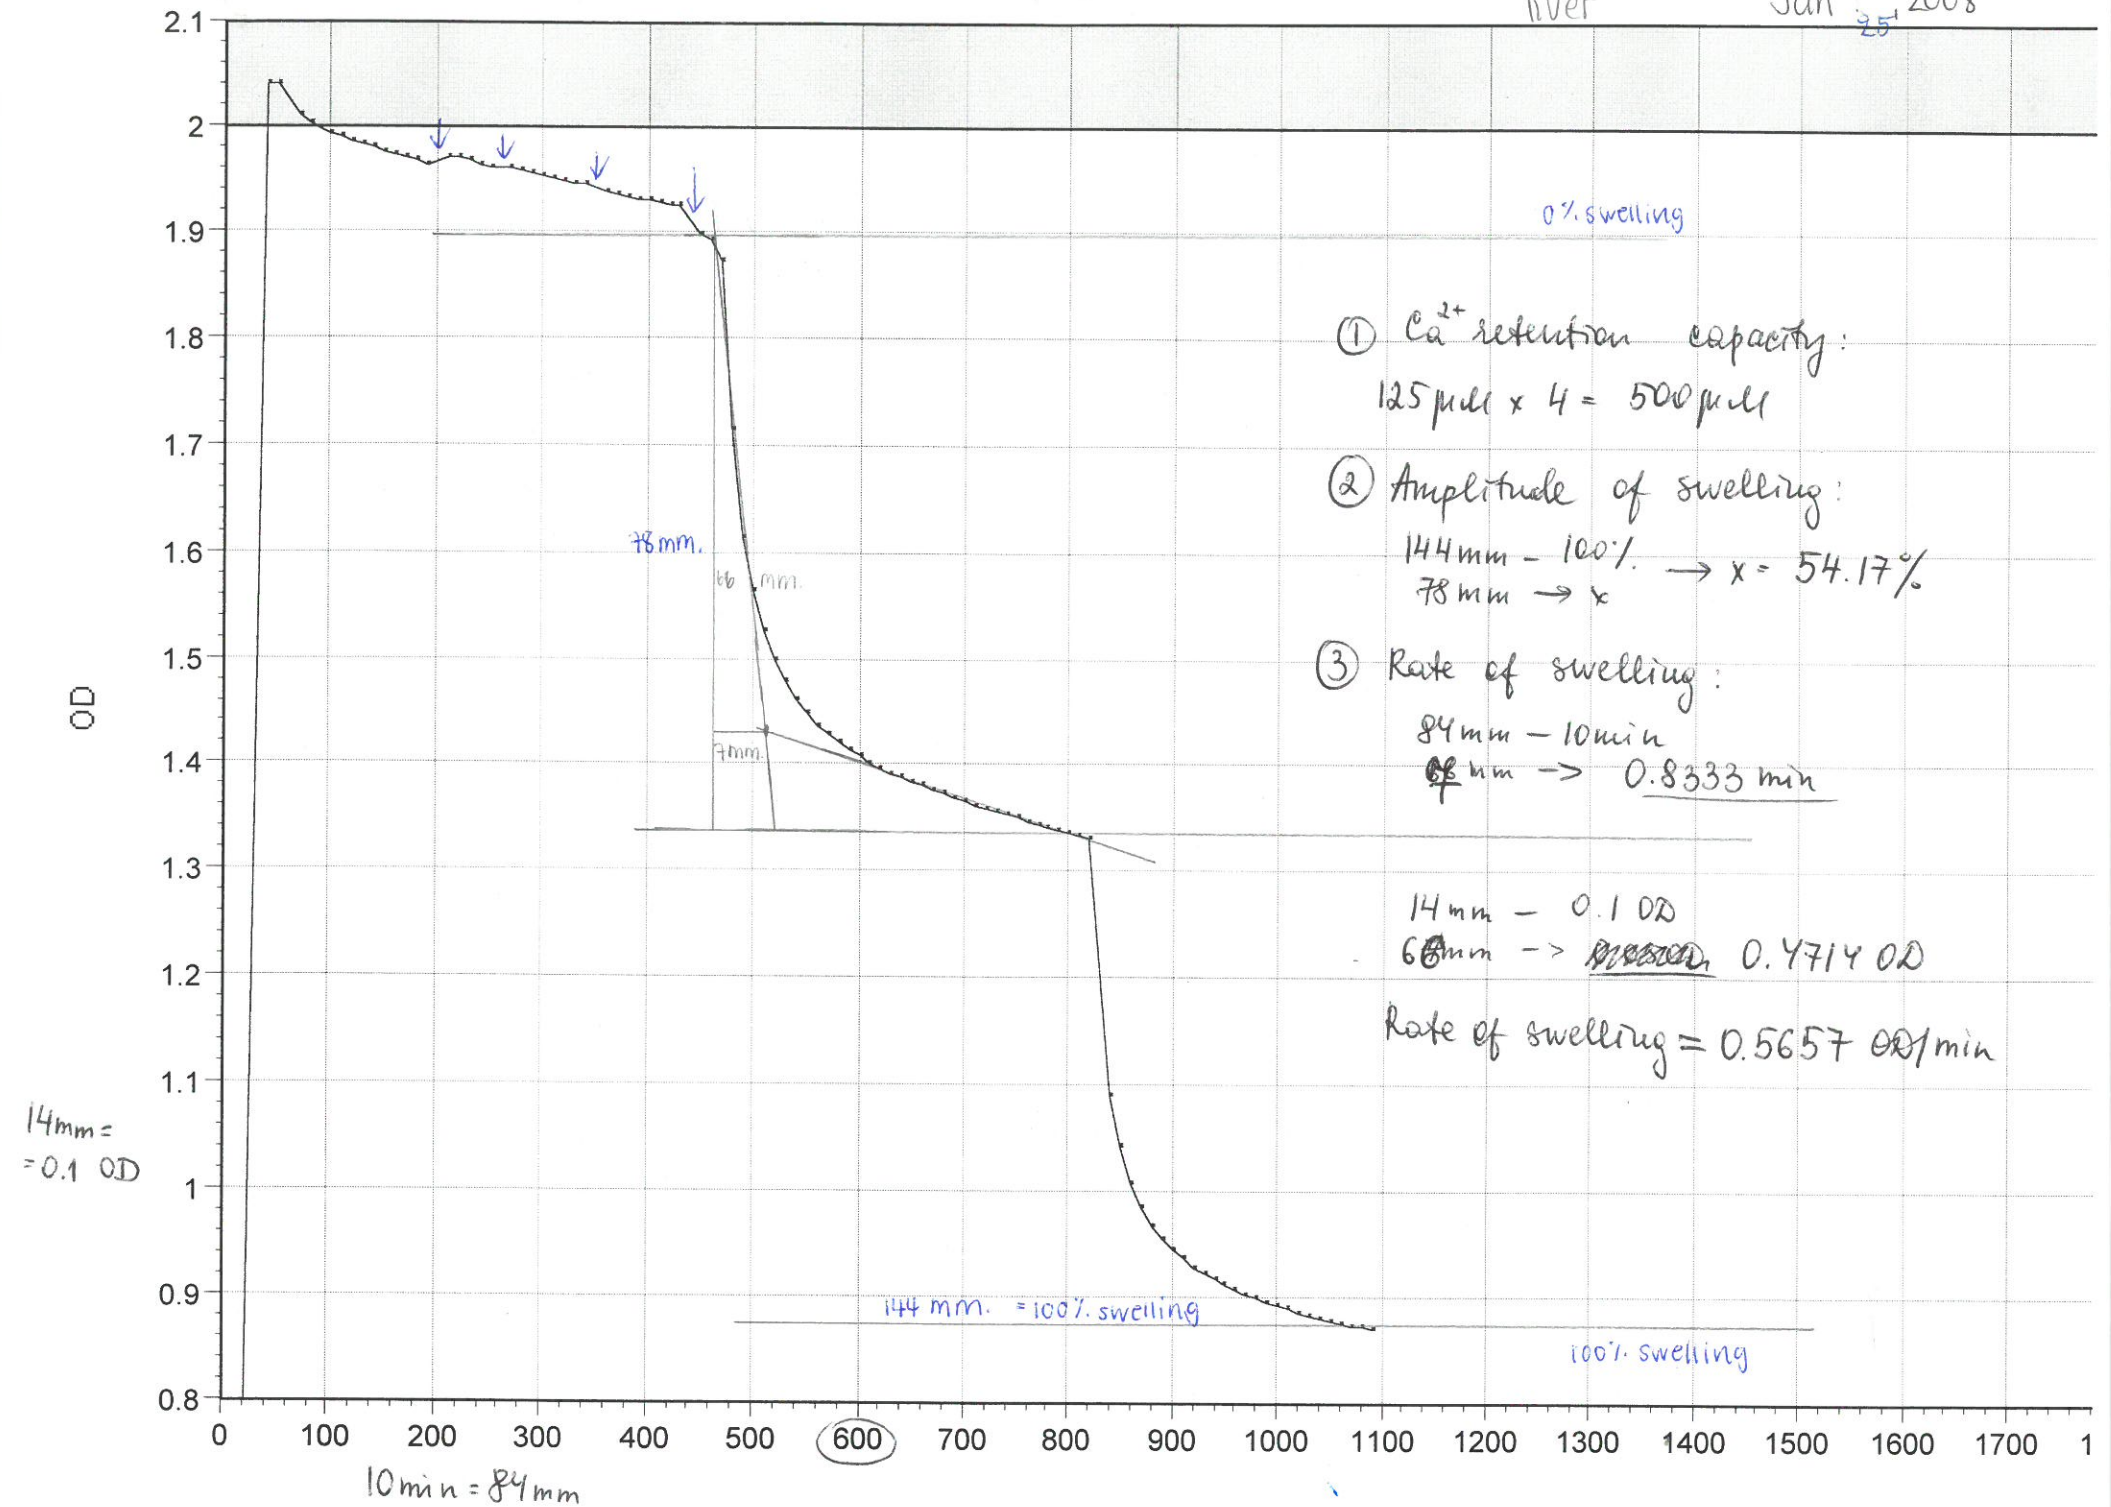



LIVER

ADP + Oligo + FGF2 + PKC $\epsilon$  scramble (x9)

50ml Ca

liver

A5 (RLM)

Jan 25, 08

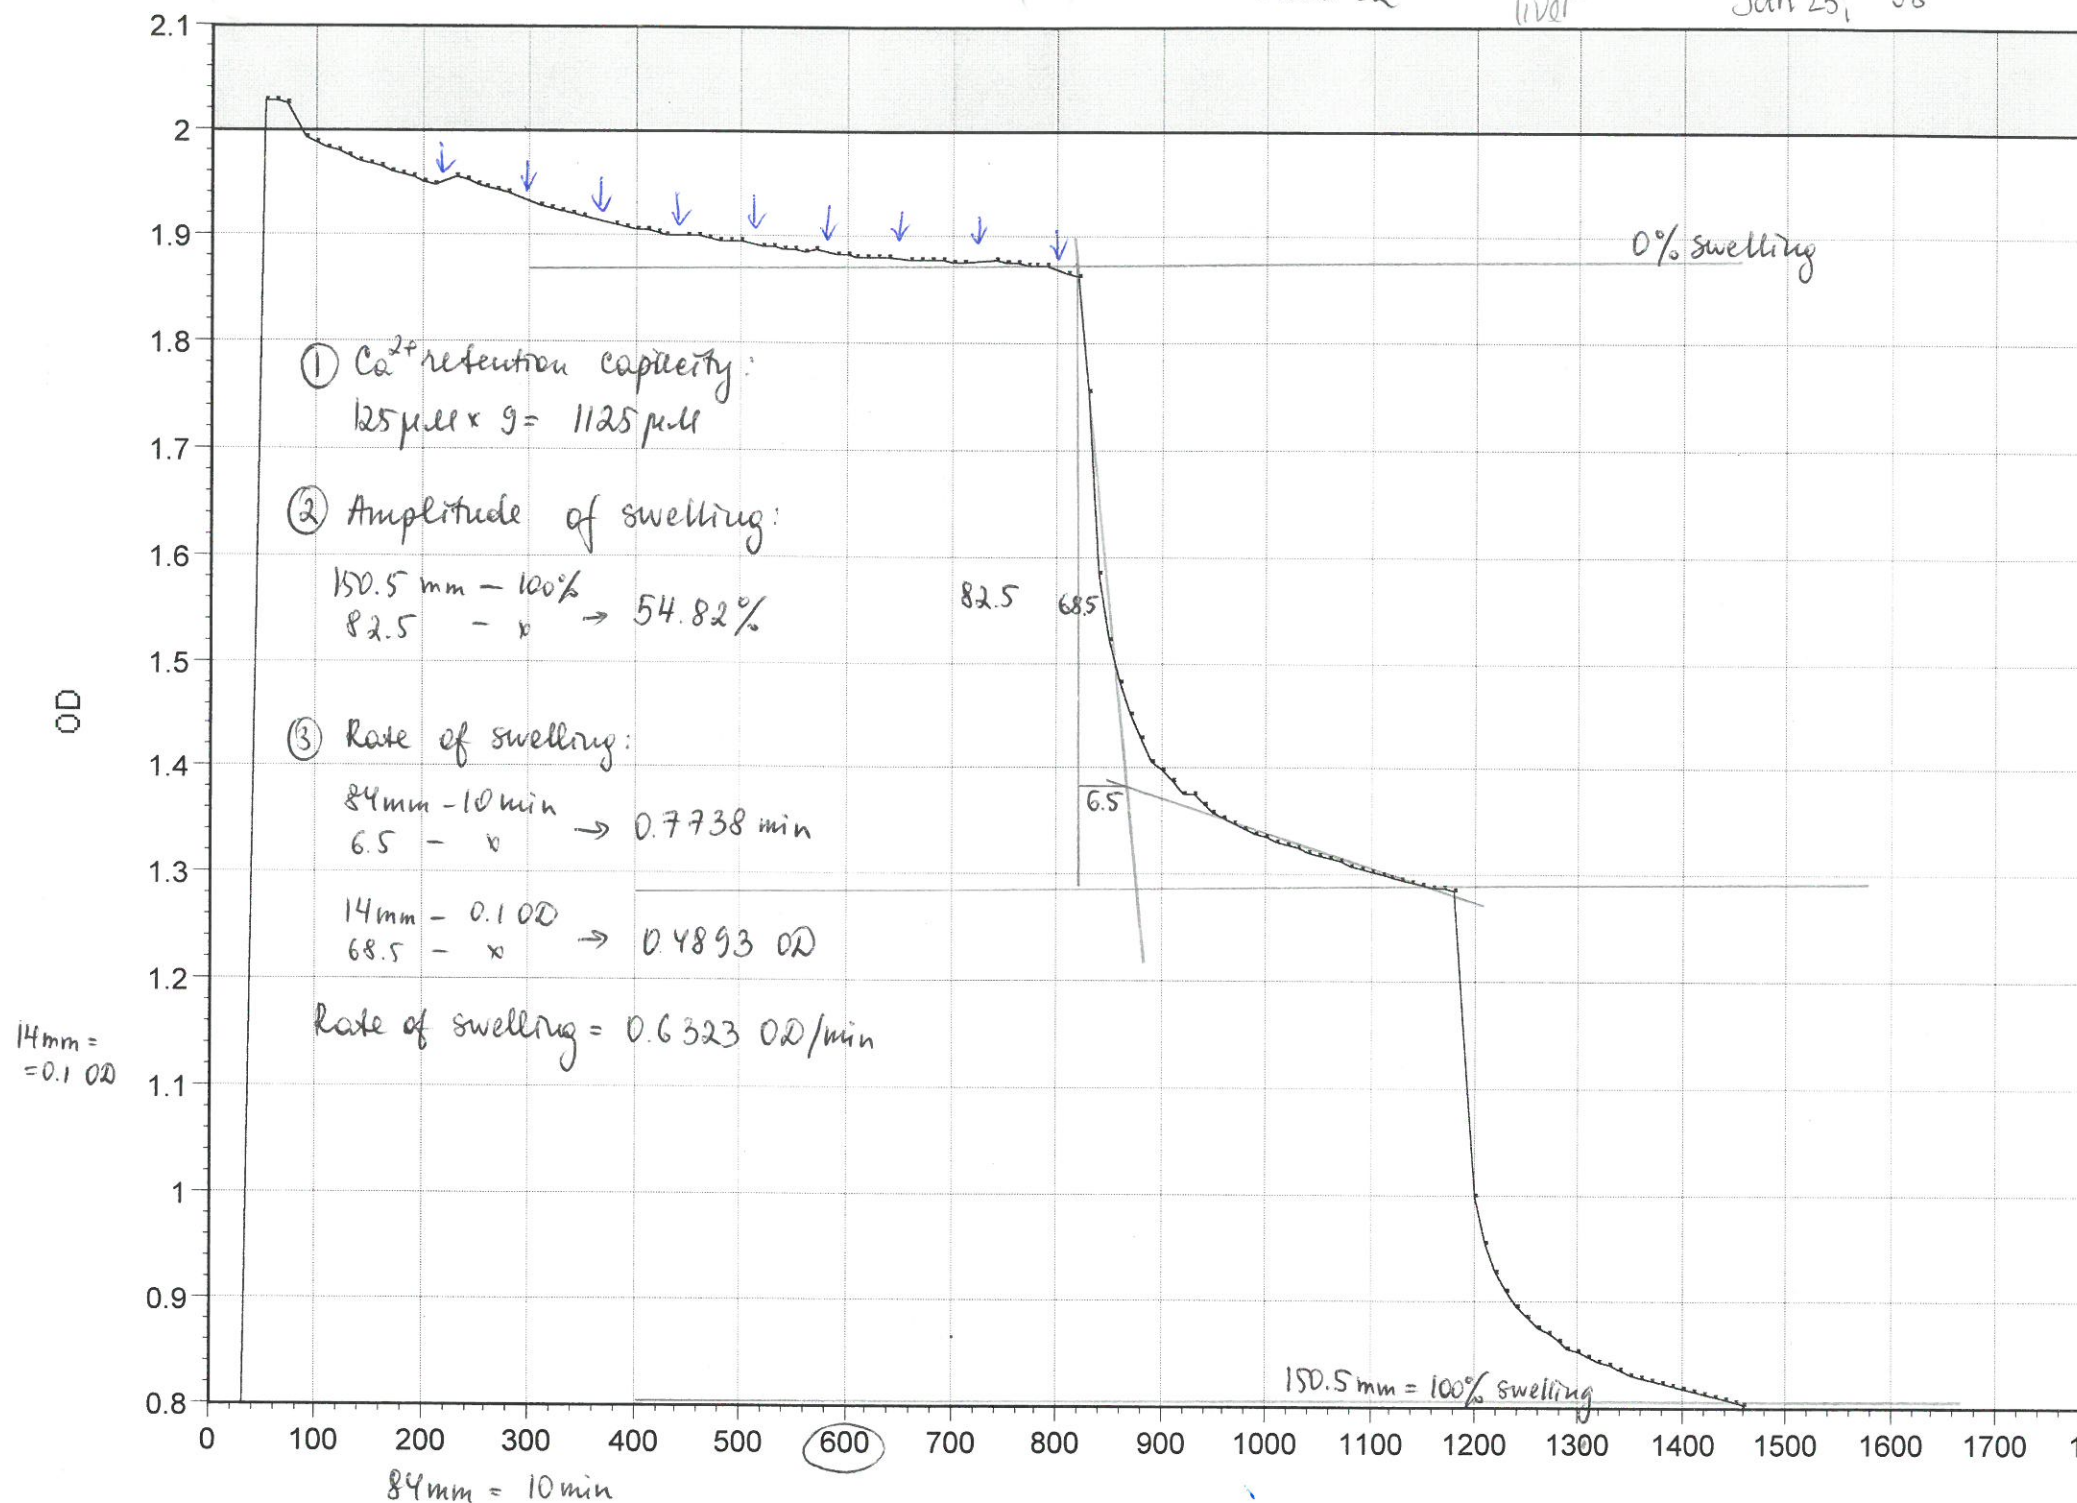



LIVER

ADP + Oligo + Cycle A  $\rightarrow$  250 mM  $\text{Ca}^{2+}$  (5  $\mu\text{M}$ /adding) (x4)

liver

Ab (KLM)  
Jan , 2008

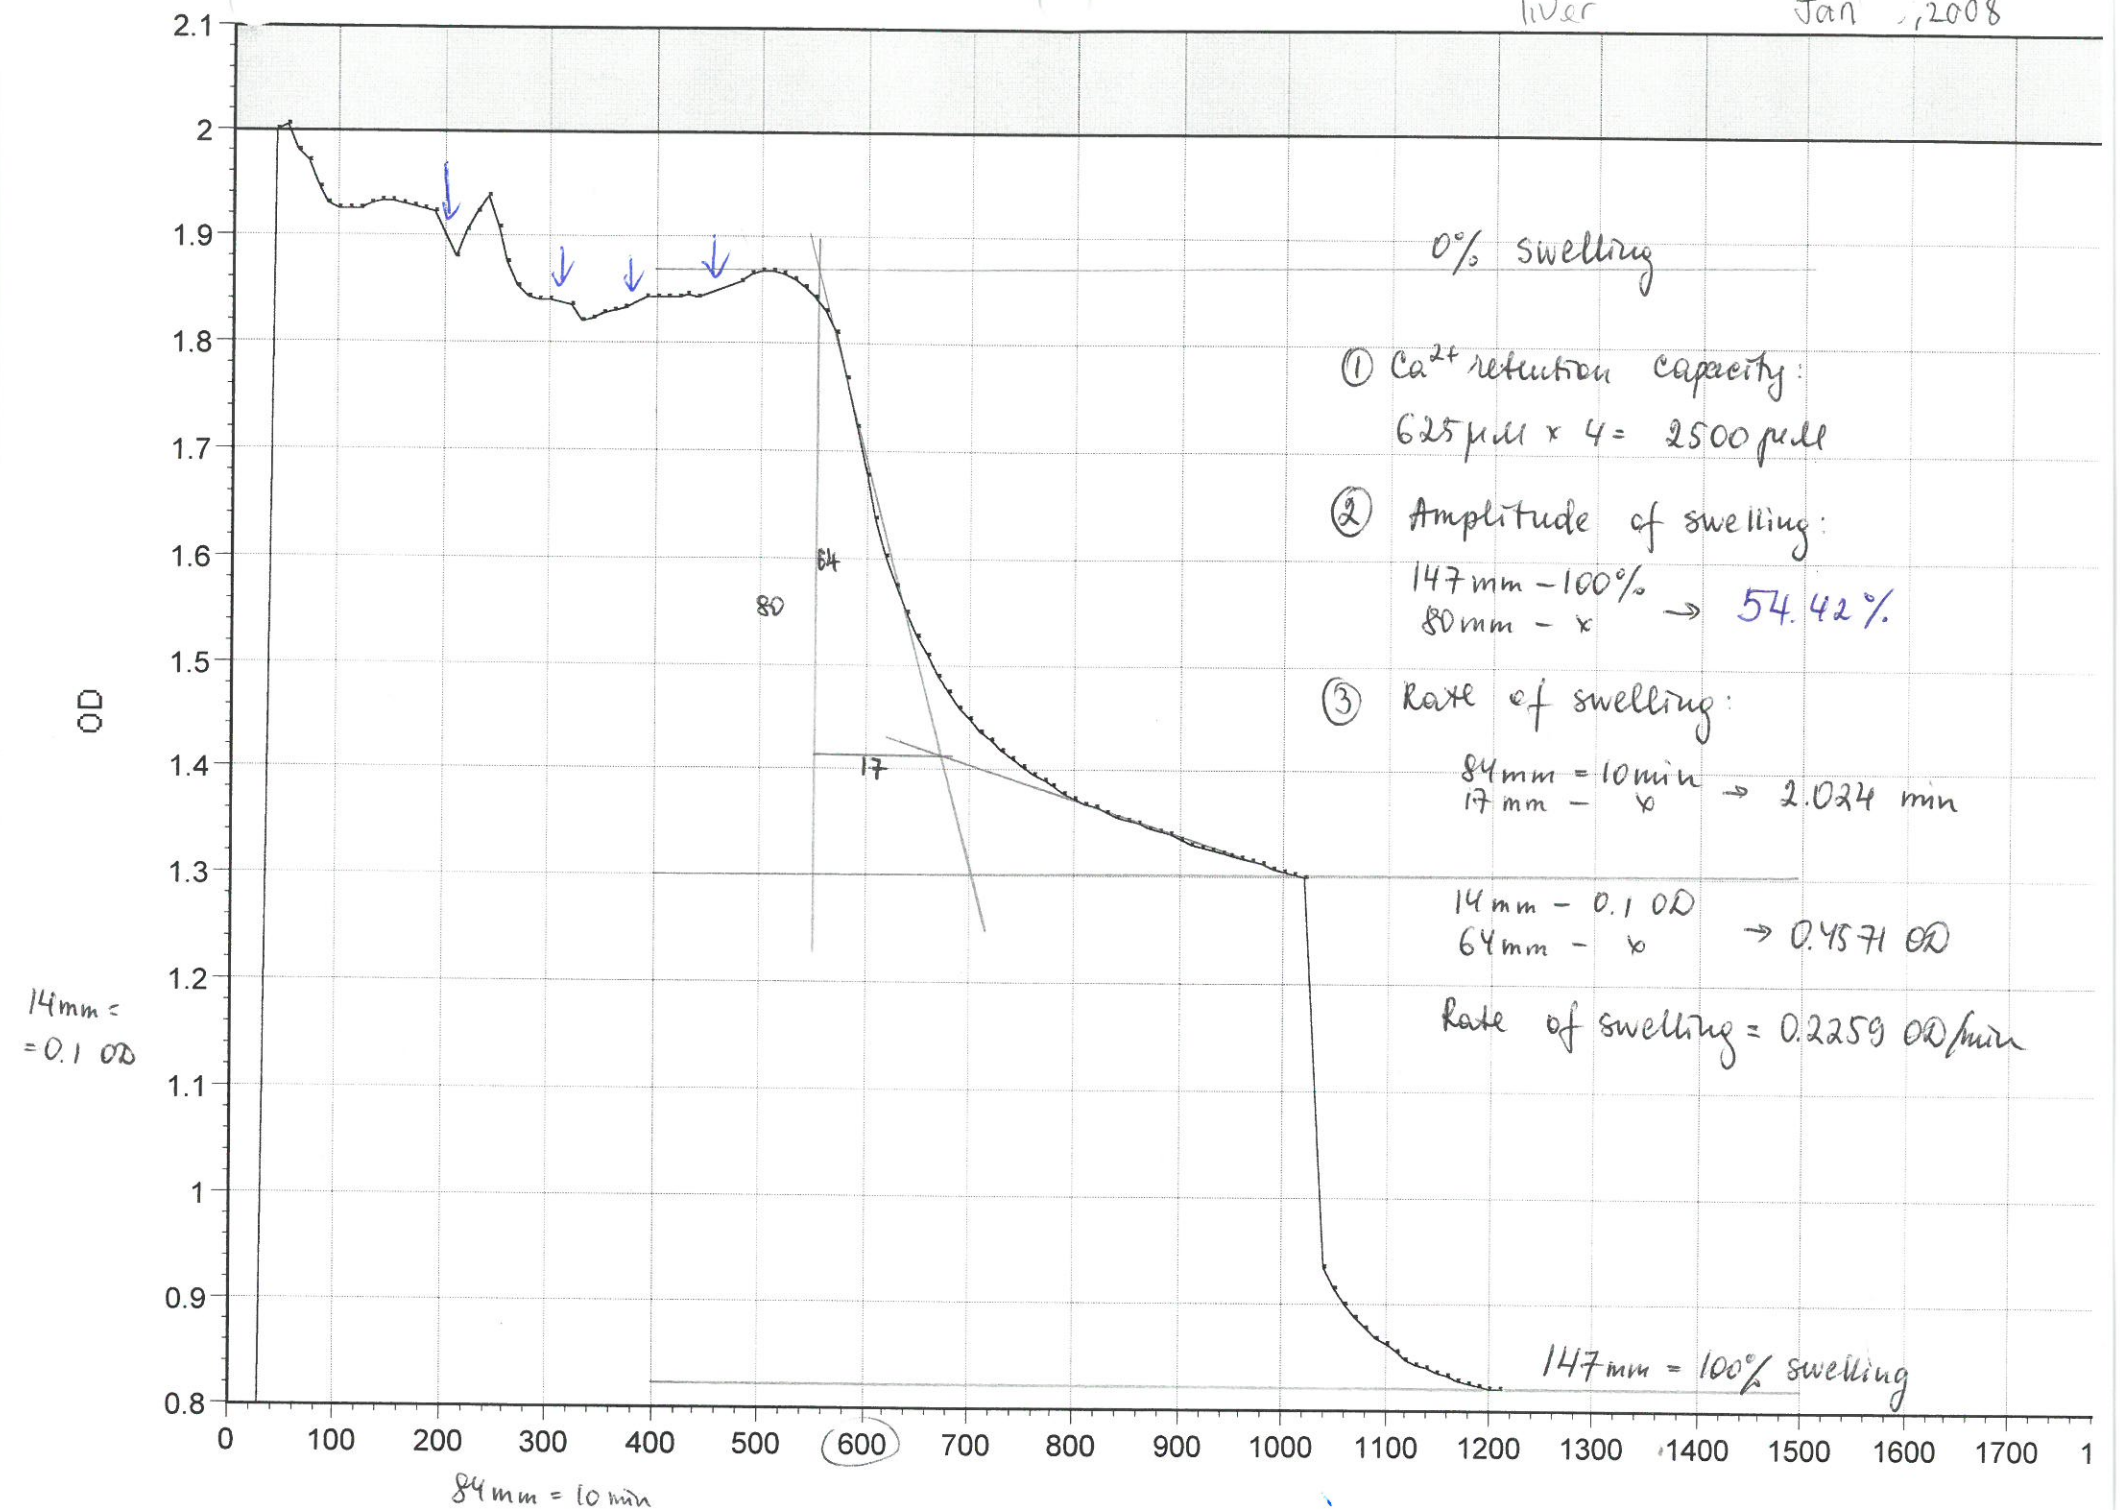

LIVER

ADP + Oligo + FGF2 + Cyclo A → 250 mM  $\text{Ca}^{2+}$  (5  $\mu\text{l}$ /adding)

liver

A7 (RLM)  
Jan. 2008

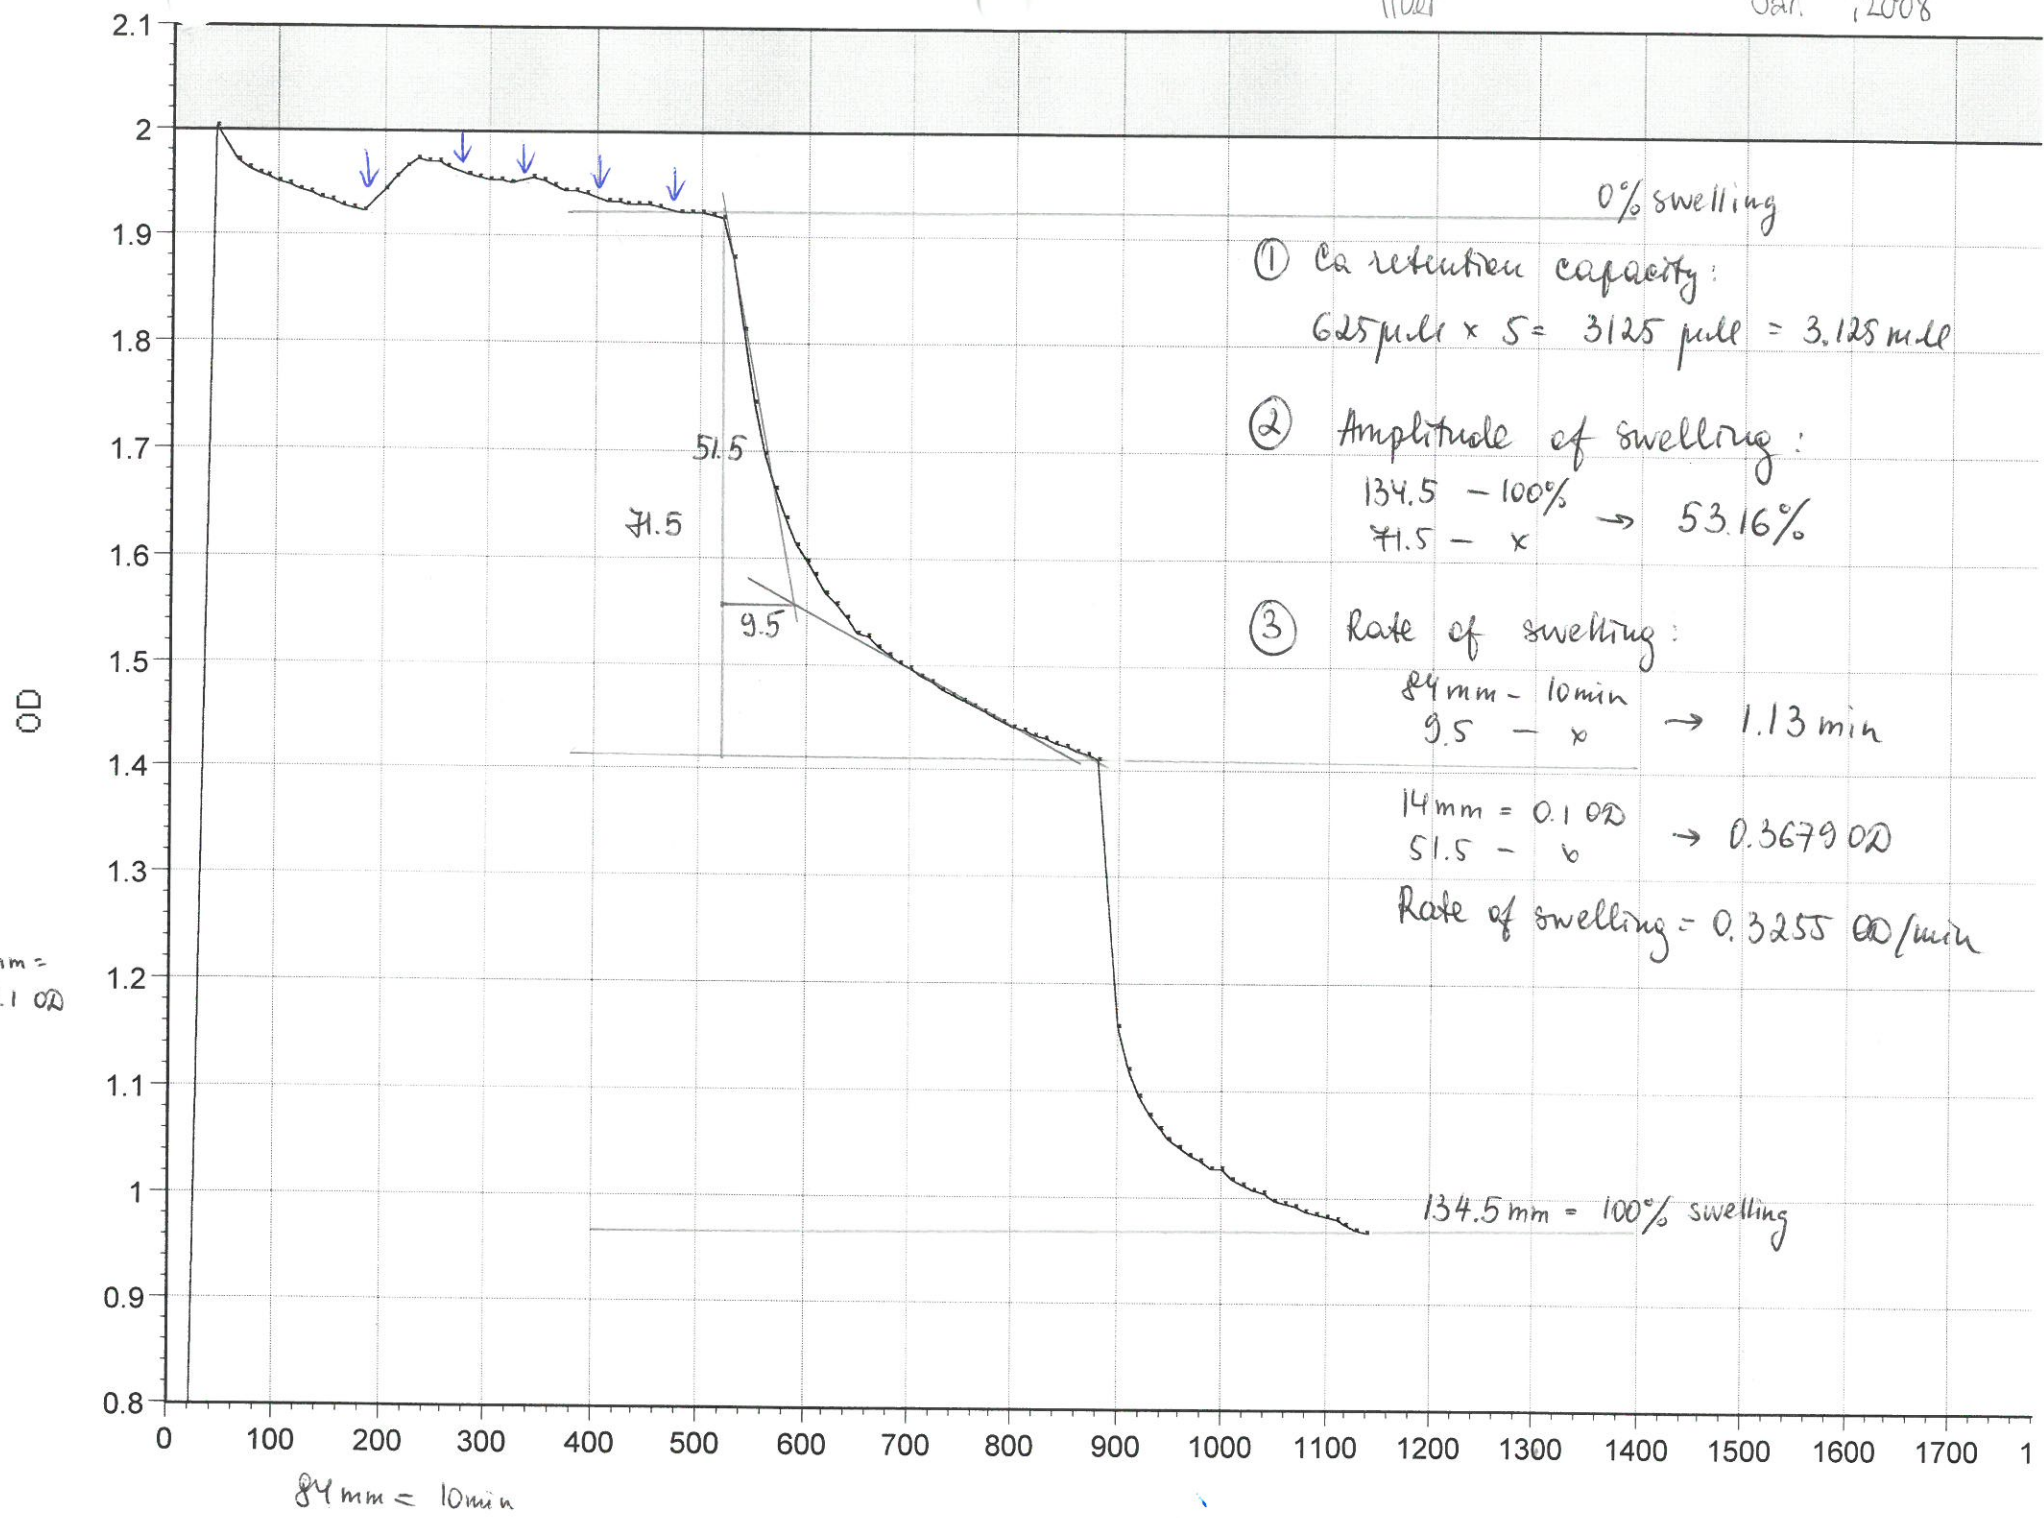



LIVER

ADP + Oligo → 50 mM Ca<sup>2+</sup>  
15 μl (adding)

liver

A8 (RLM)  
Jan 2008

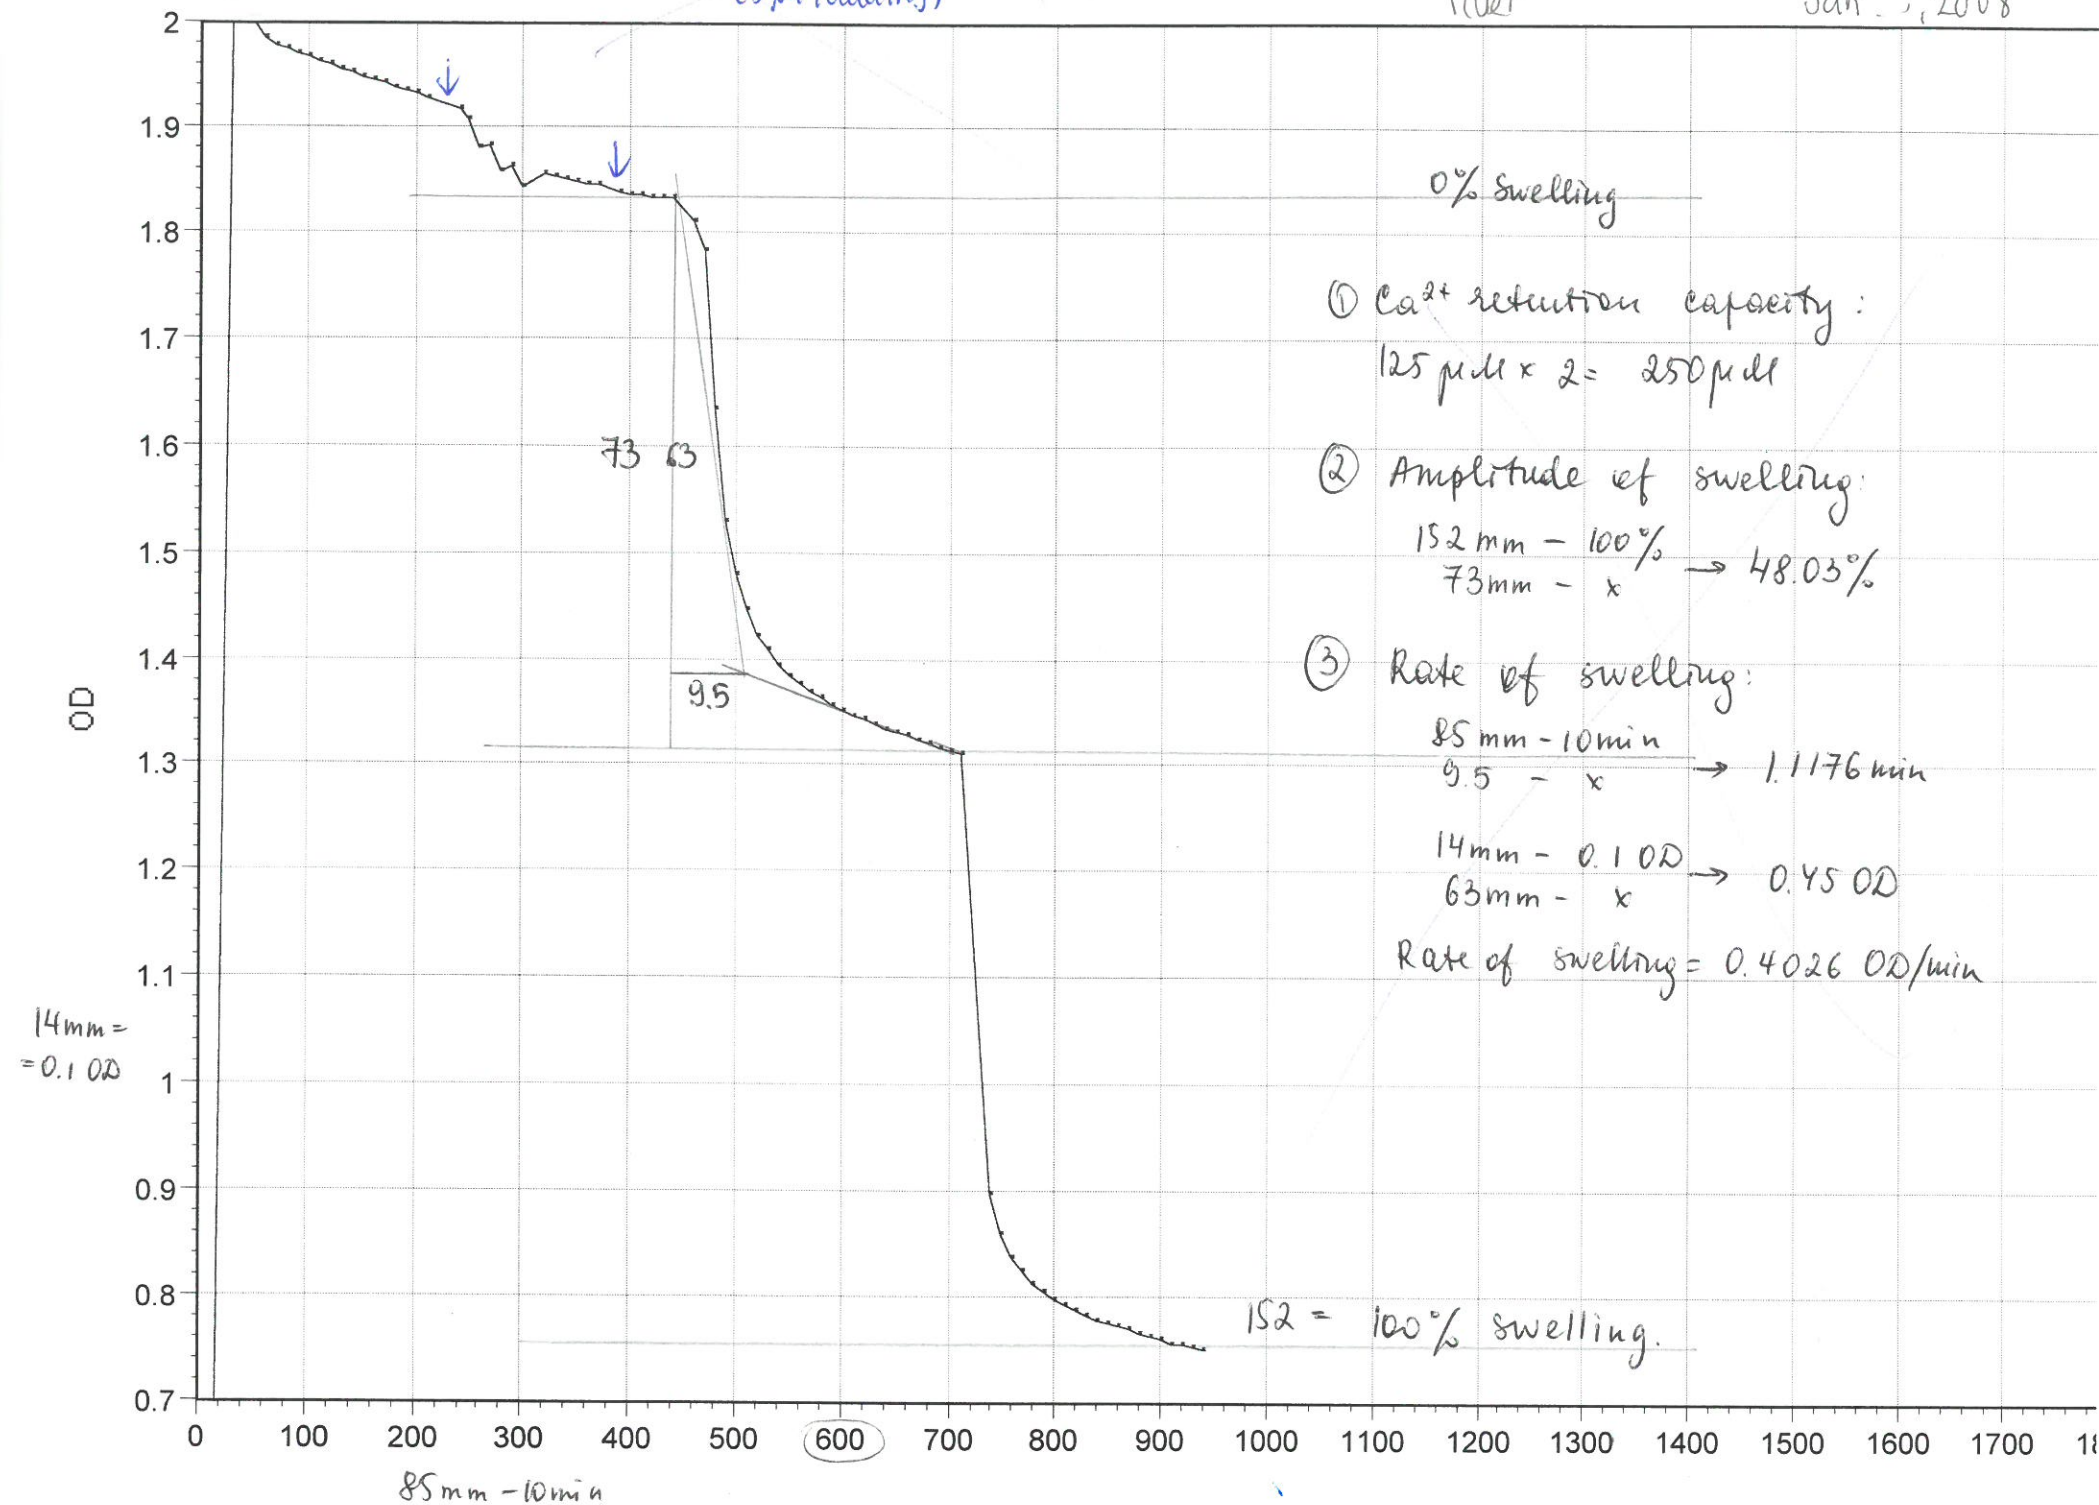



A1

(ADP+olig) = Control  
50  $\mu$ M Ca, 5  $\mu$ M (X4)

liver

Feb 8 2008

A1

LIVER

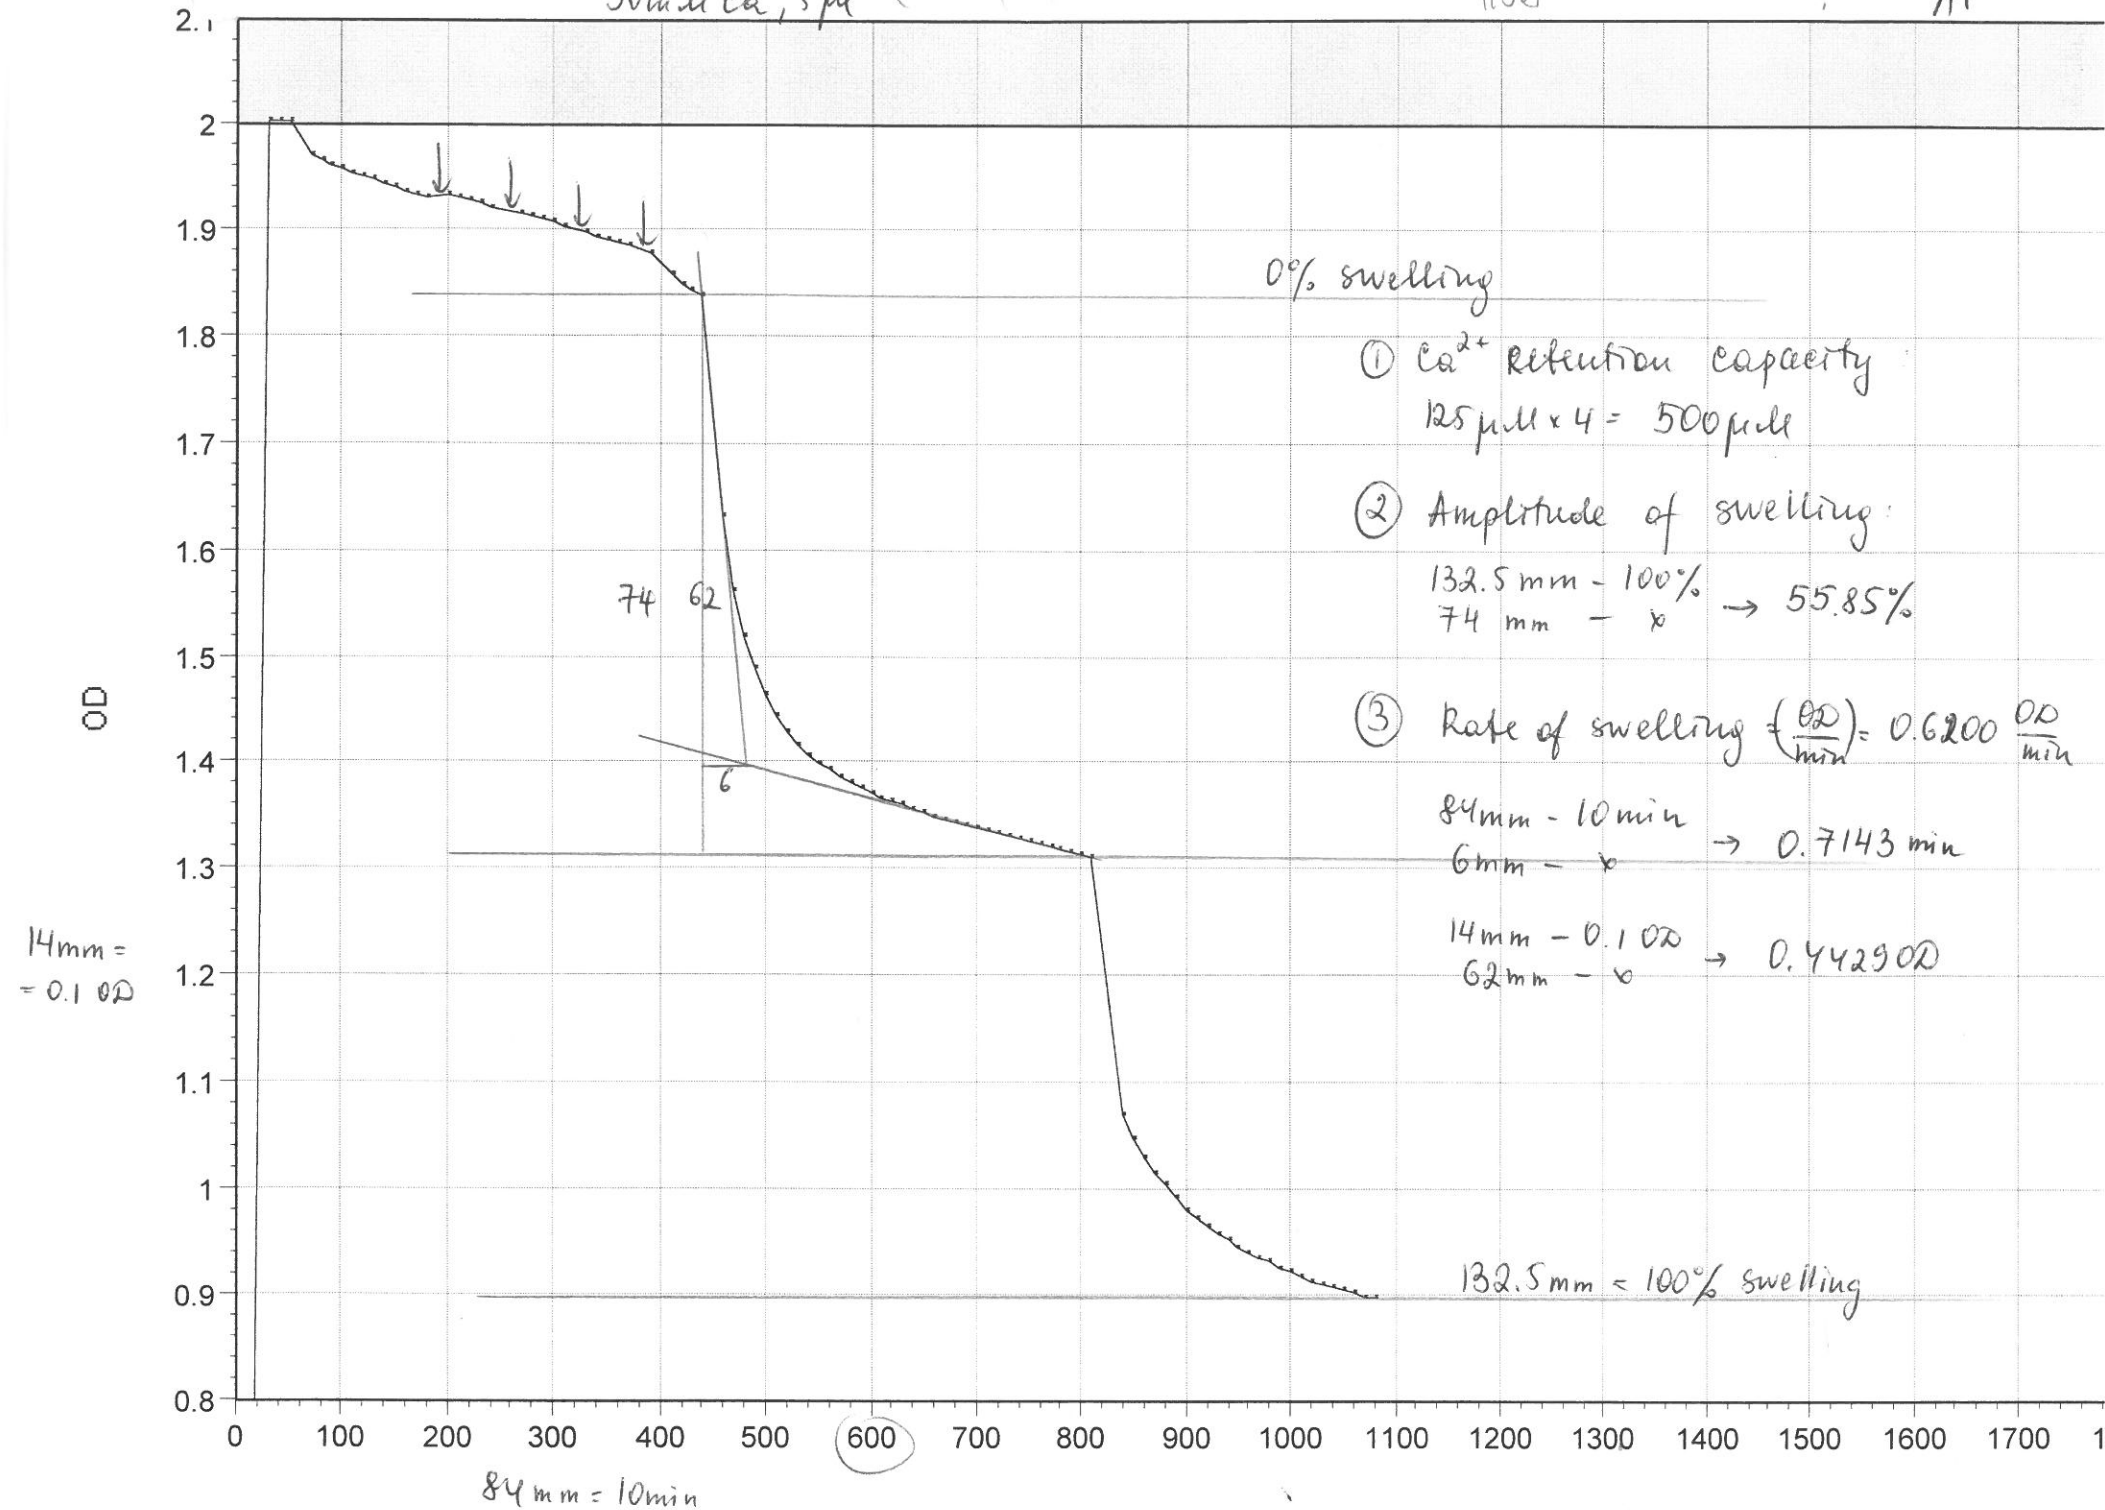

A2

ADP+olig+ FGF2  $\rightarrow$  50  $\mu$ l cell  
5  $\mu$ l

(x9)

liver

Feb 5, 2008  
A2

LIVER

OD

14 mm =  
= 0.1 OD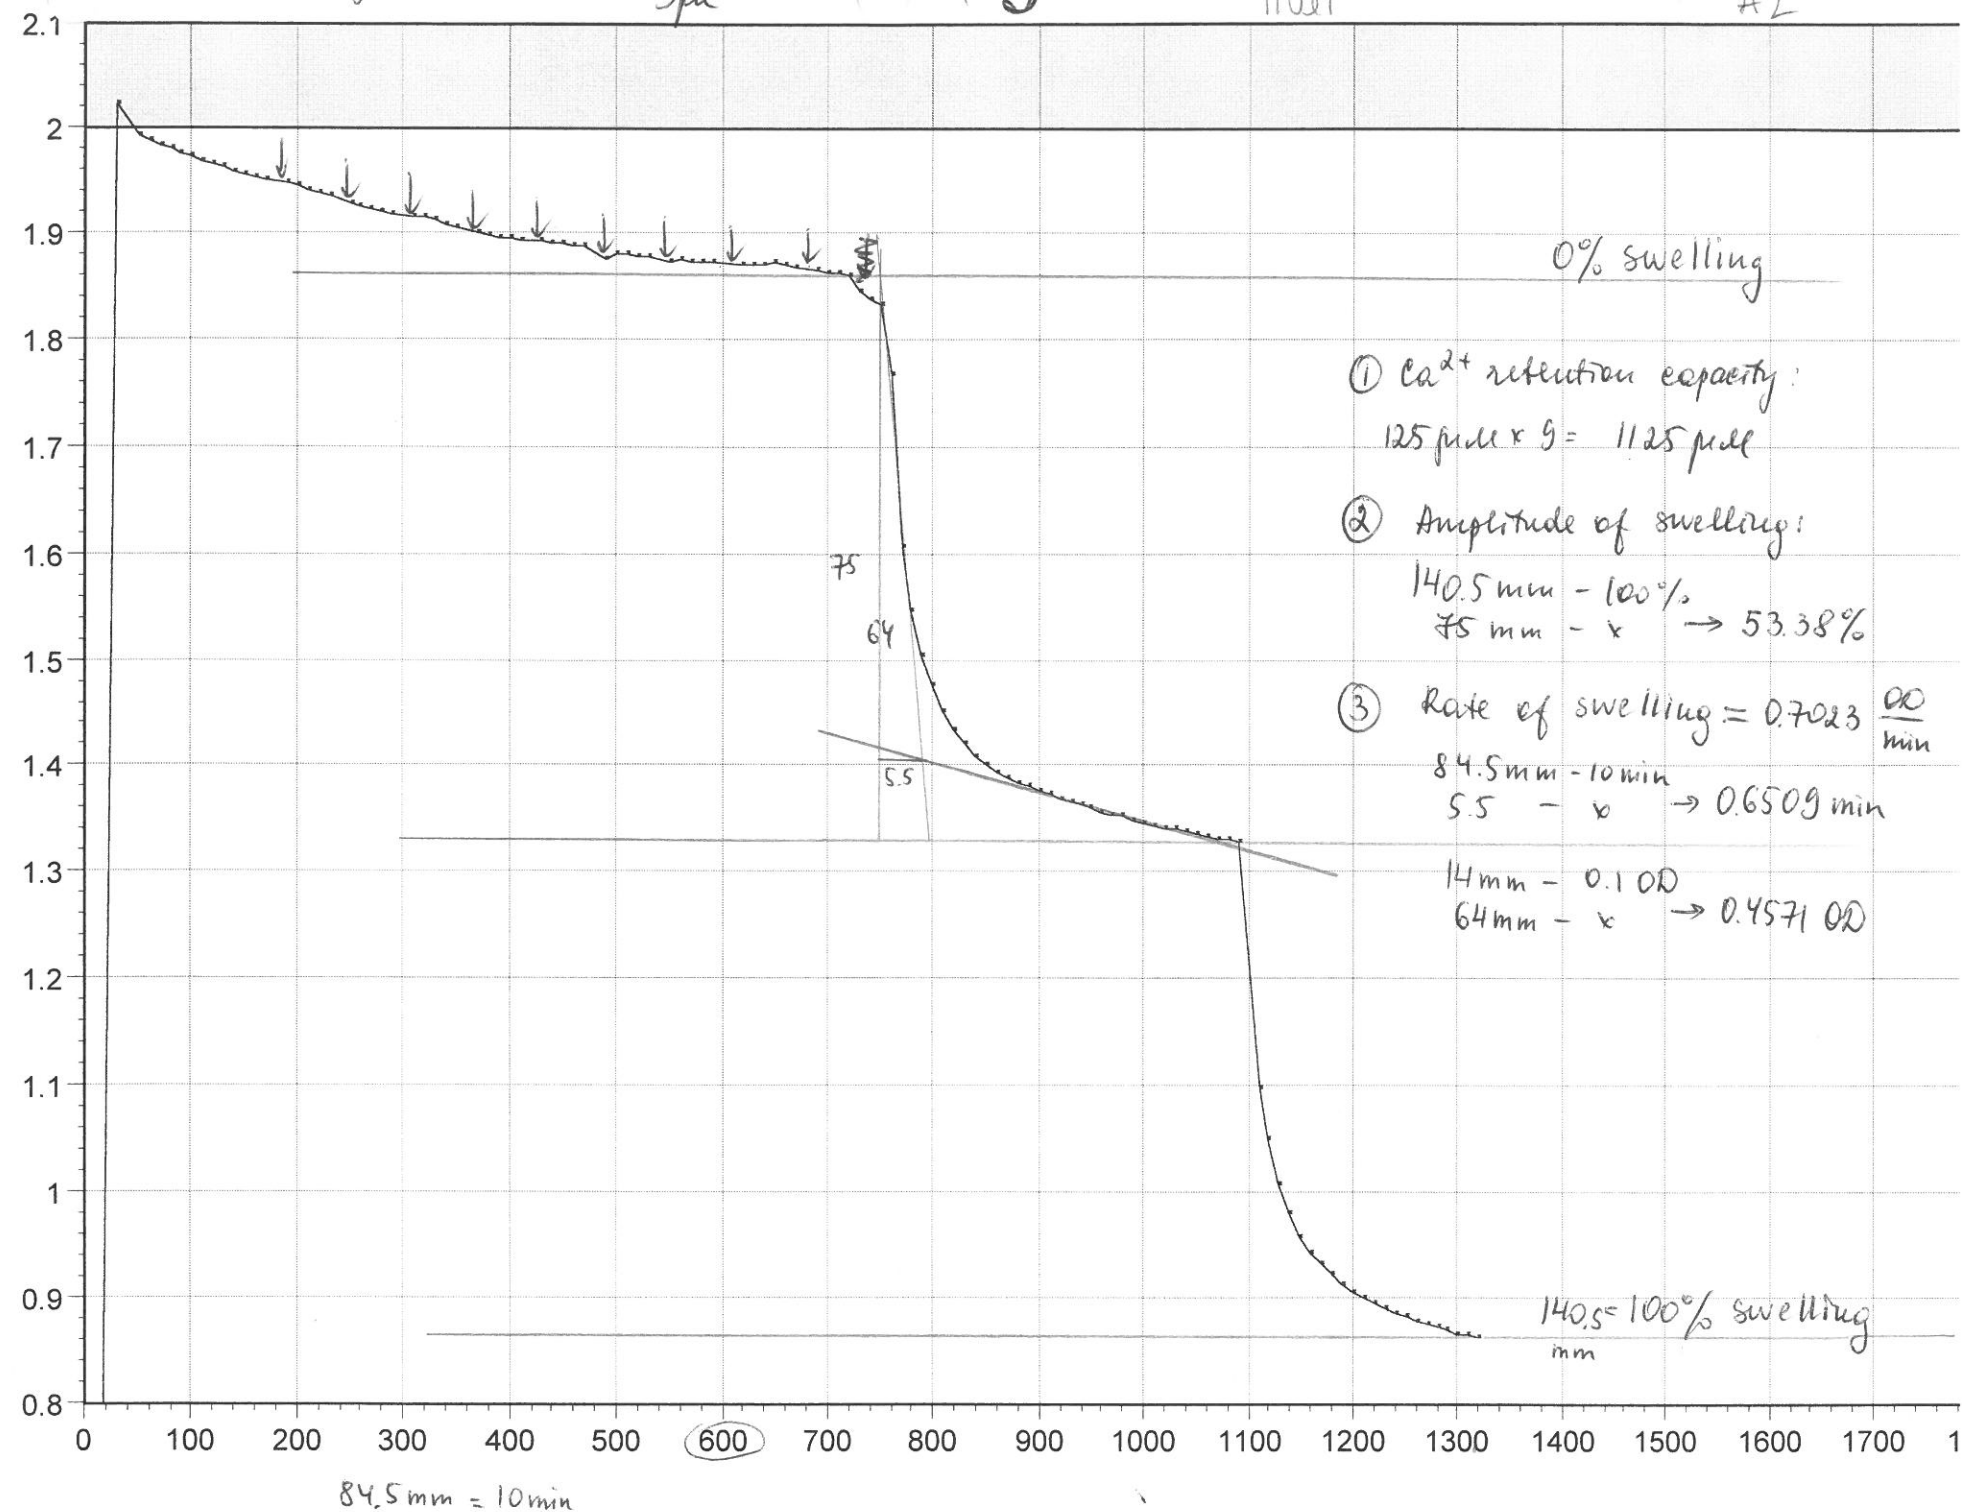

A3

ADP + oligo + FGF + PKCE inhib →

50  $\mu$ mol Co (x3)  
5  $\mu$ l

liver

Feb 8, 2008  
A3

LIVER

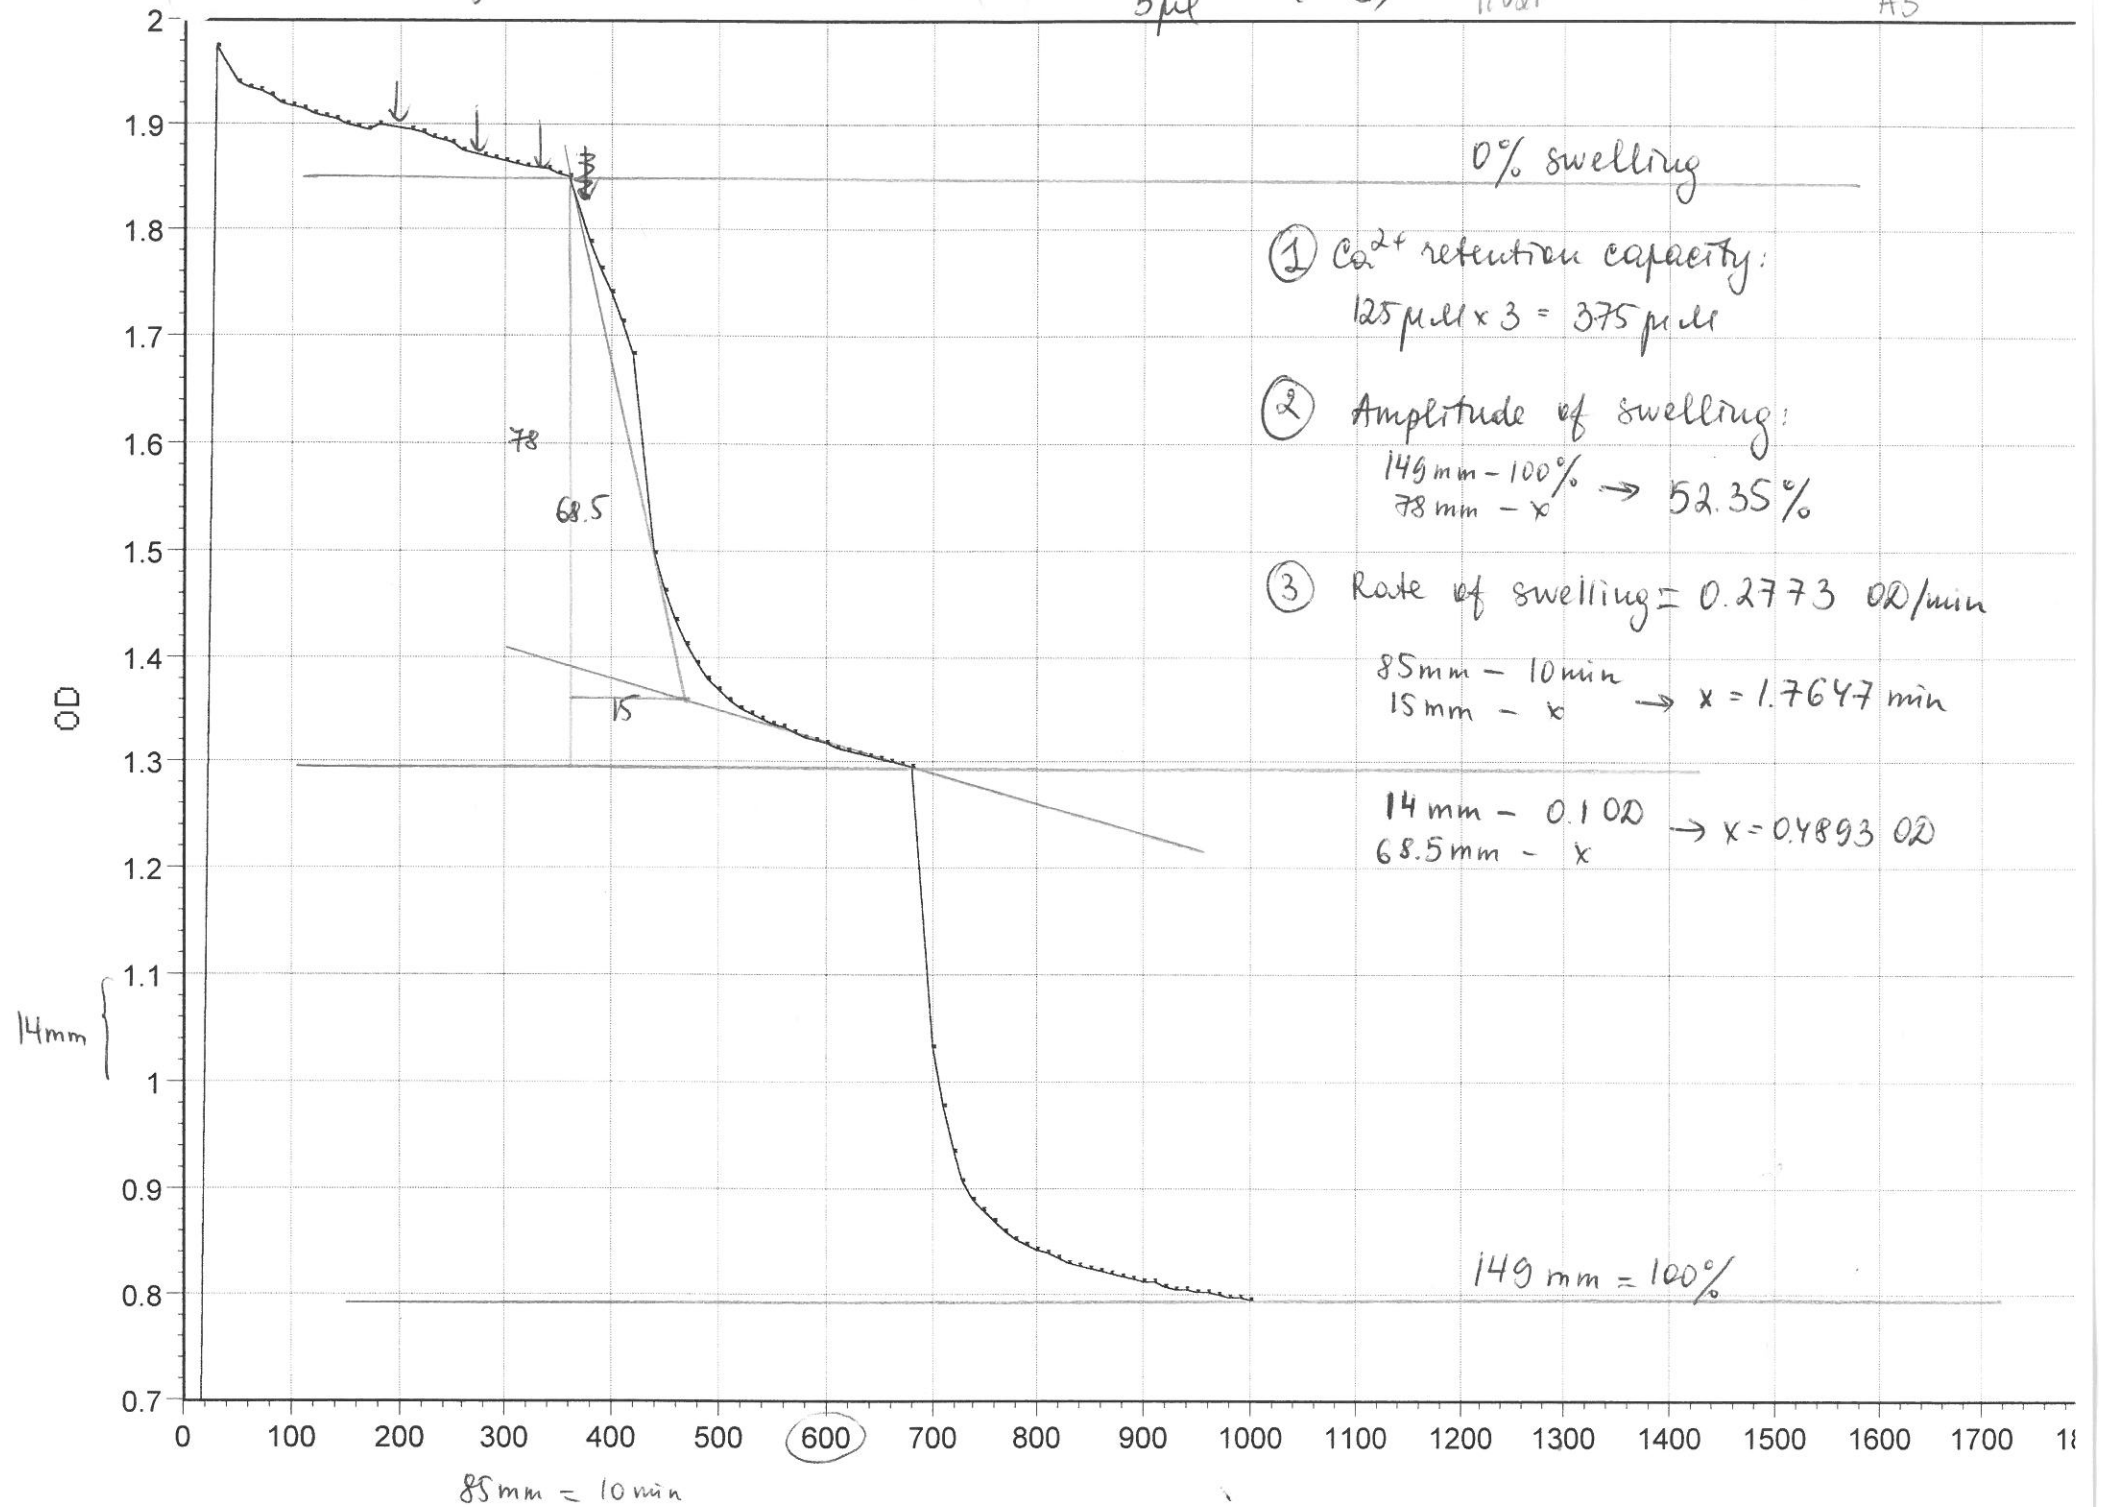



A4

ADP + oligo + FGF2 + PKC $\epsilon$  inh  
scrambled

→ 50 mM Ca (x9) liver

Feb 8, 2008  
A4

LIVER

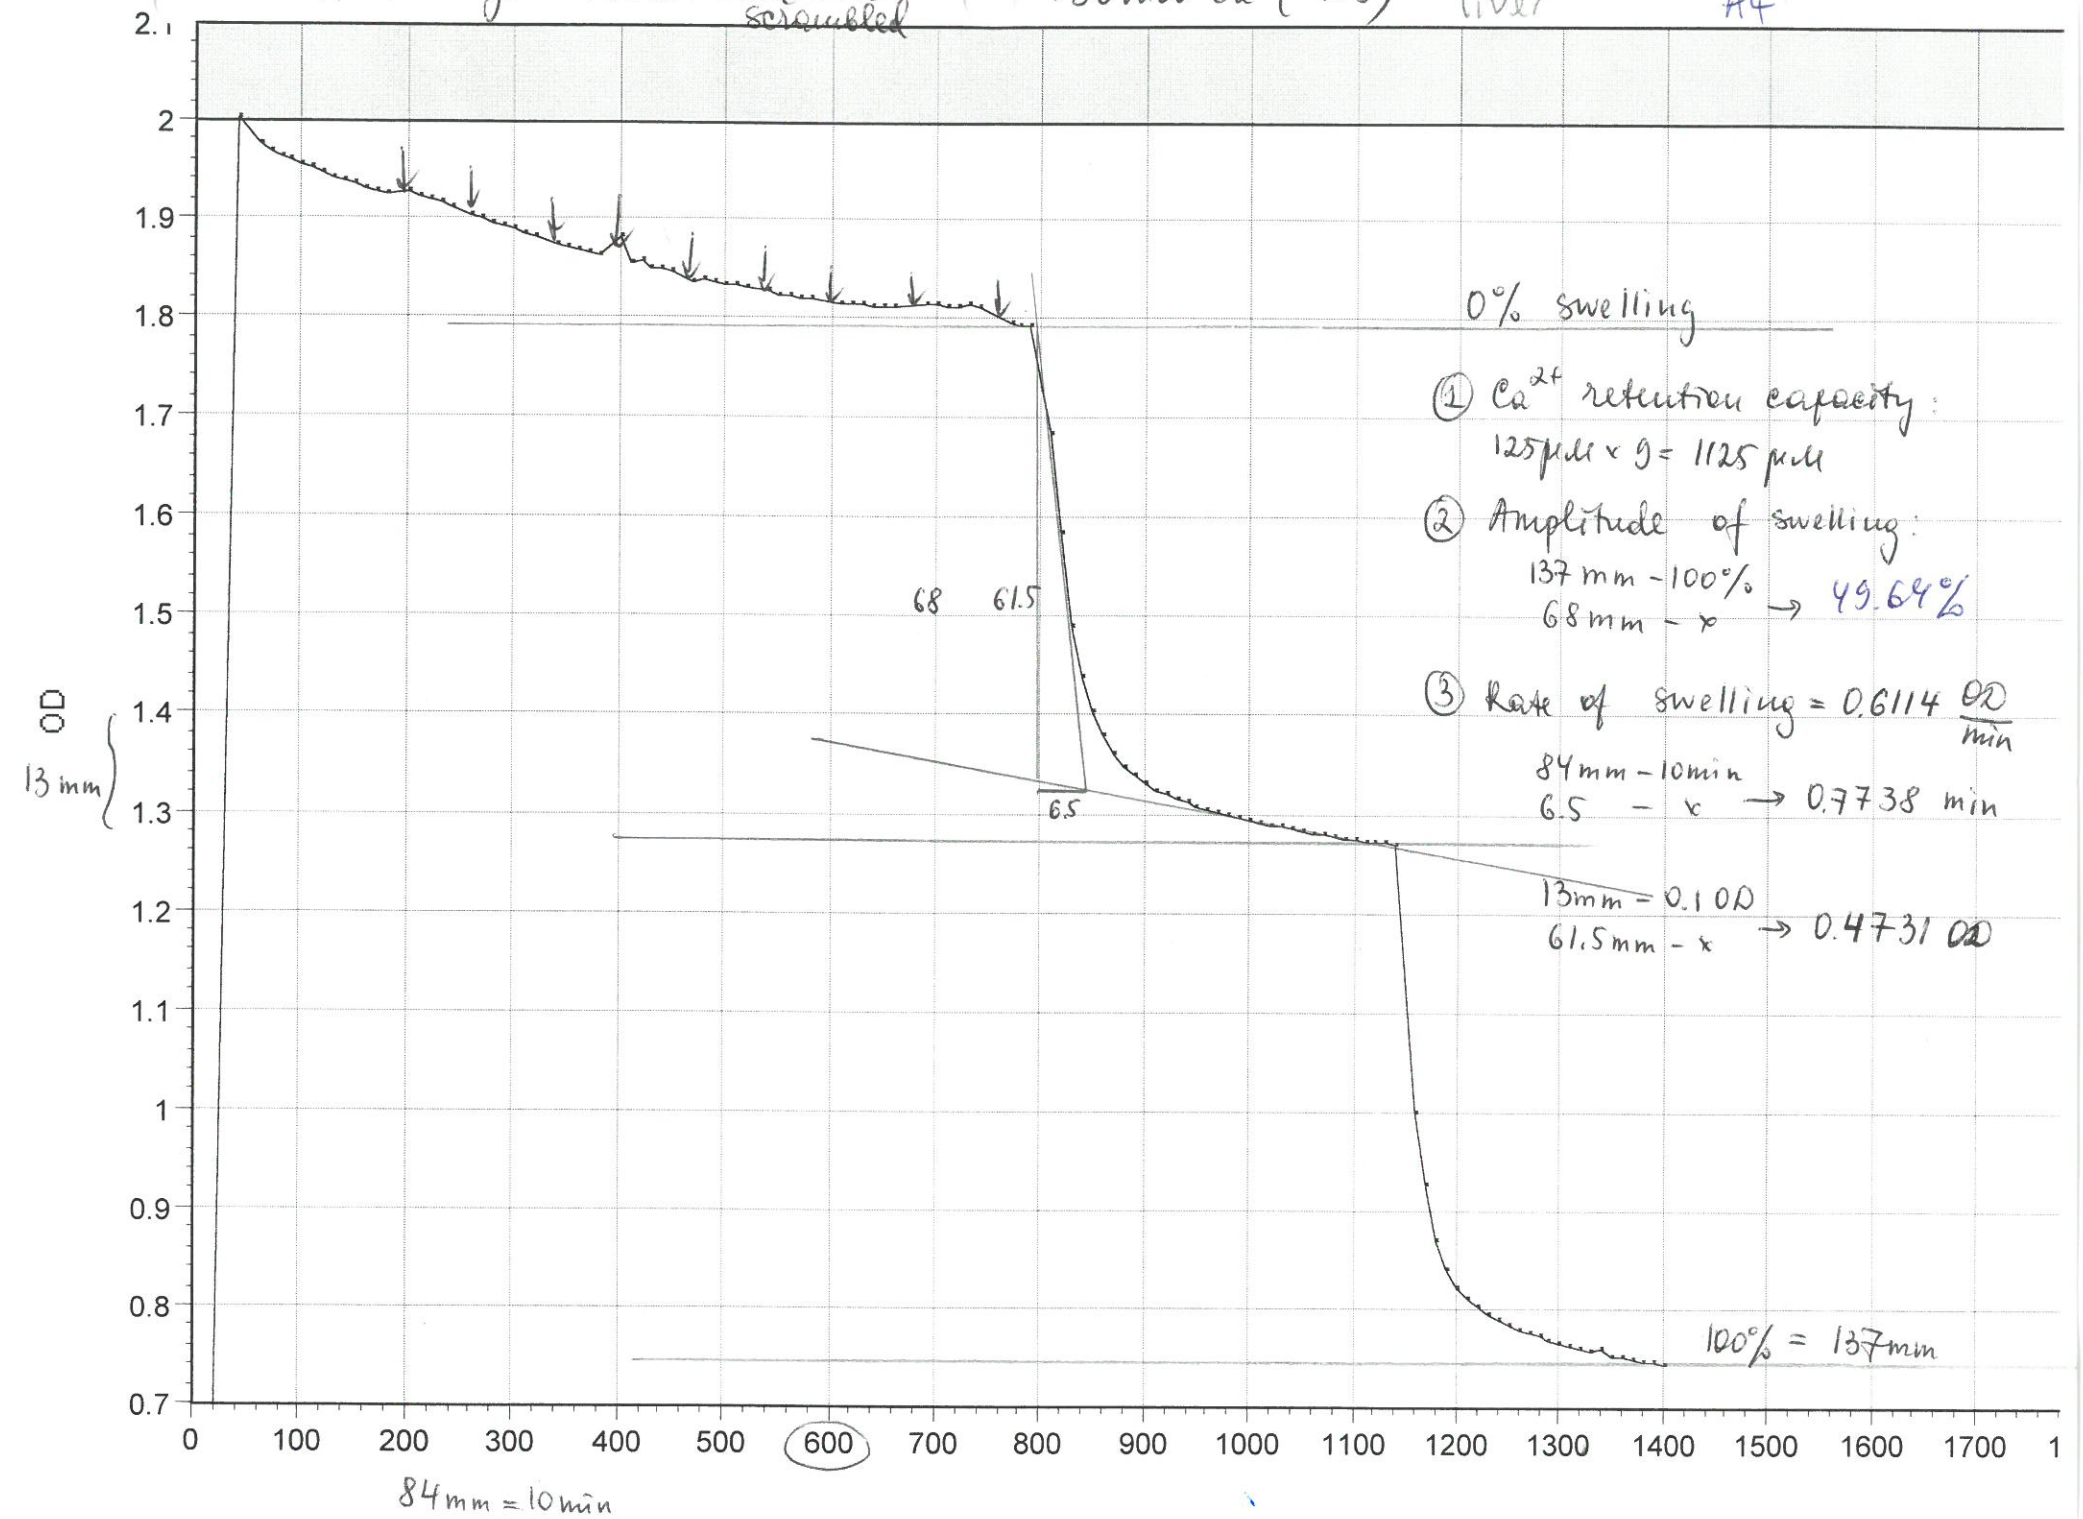

A5 + A6

ADP + olig + Cyclosporin A →

→ 250  $\mu$ l  $Ca^{2+}$   
5  $\mu$ l  
(x5)

liver

Feb 8 '08

LIVER

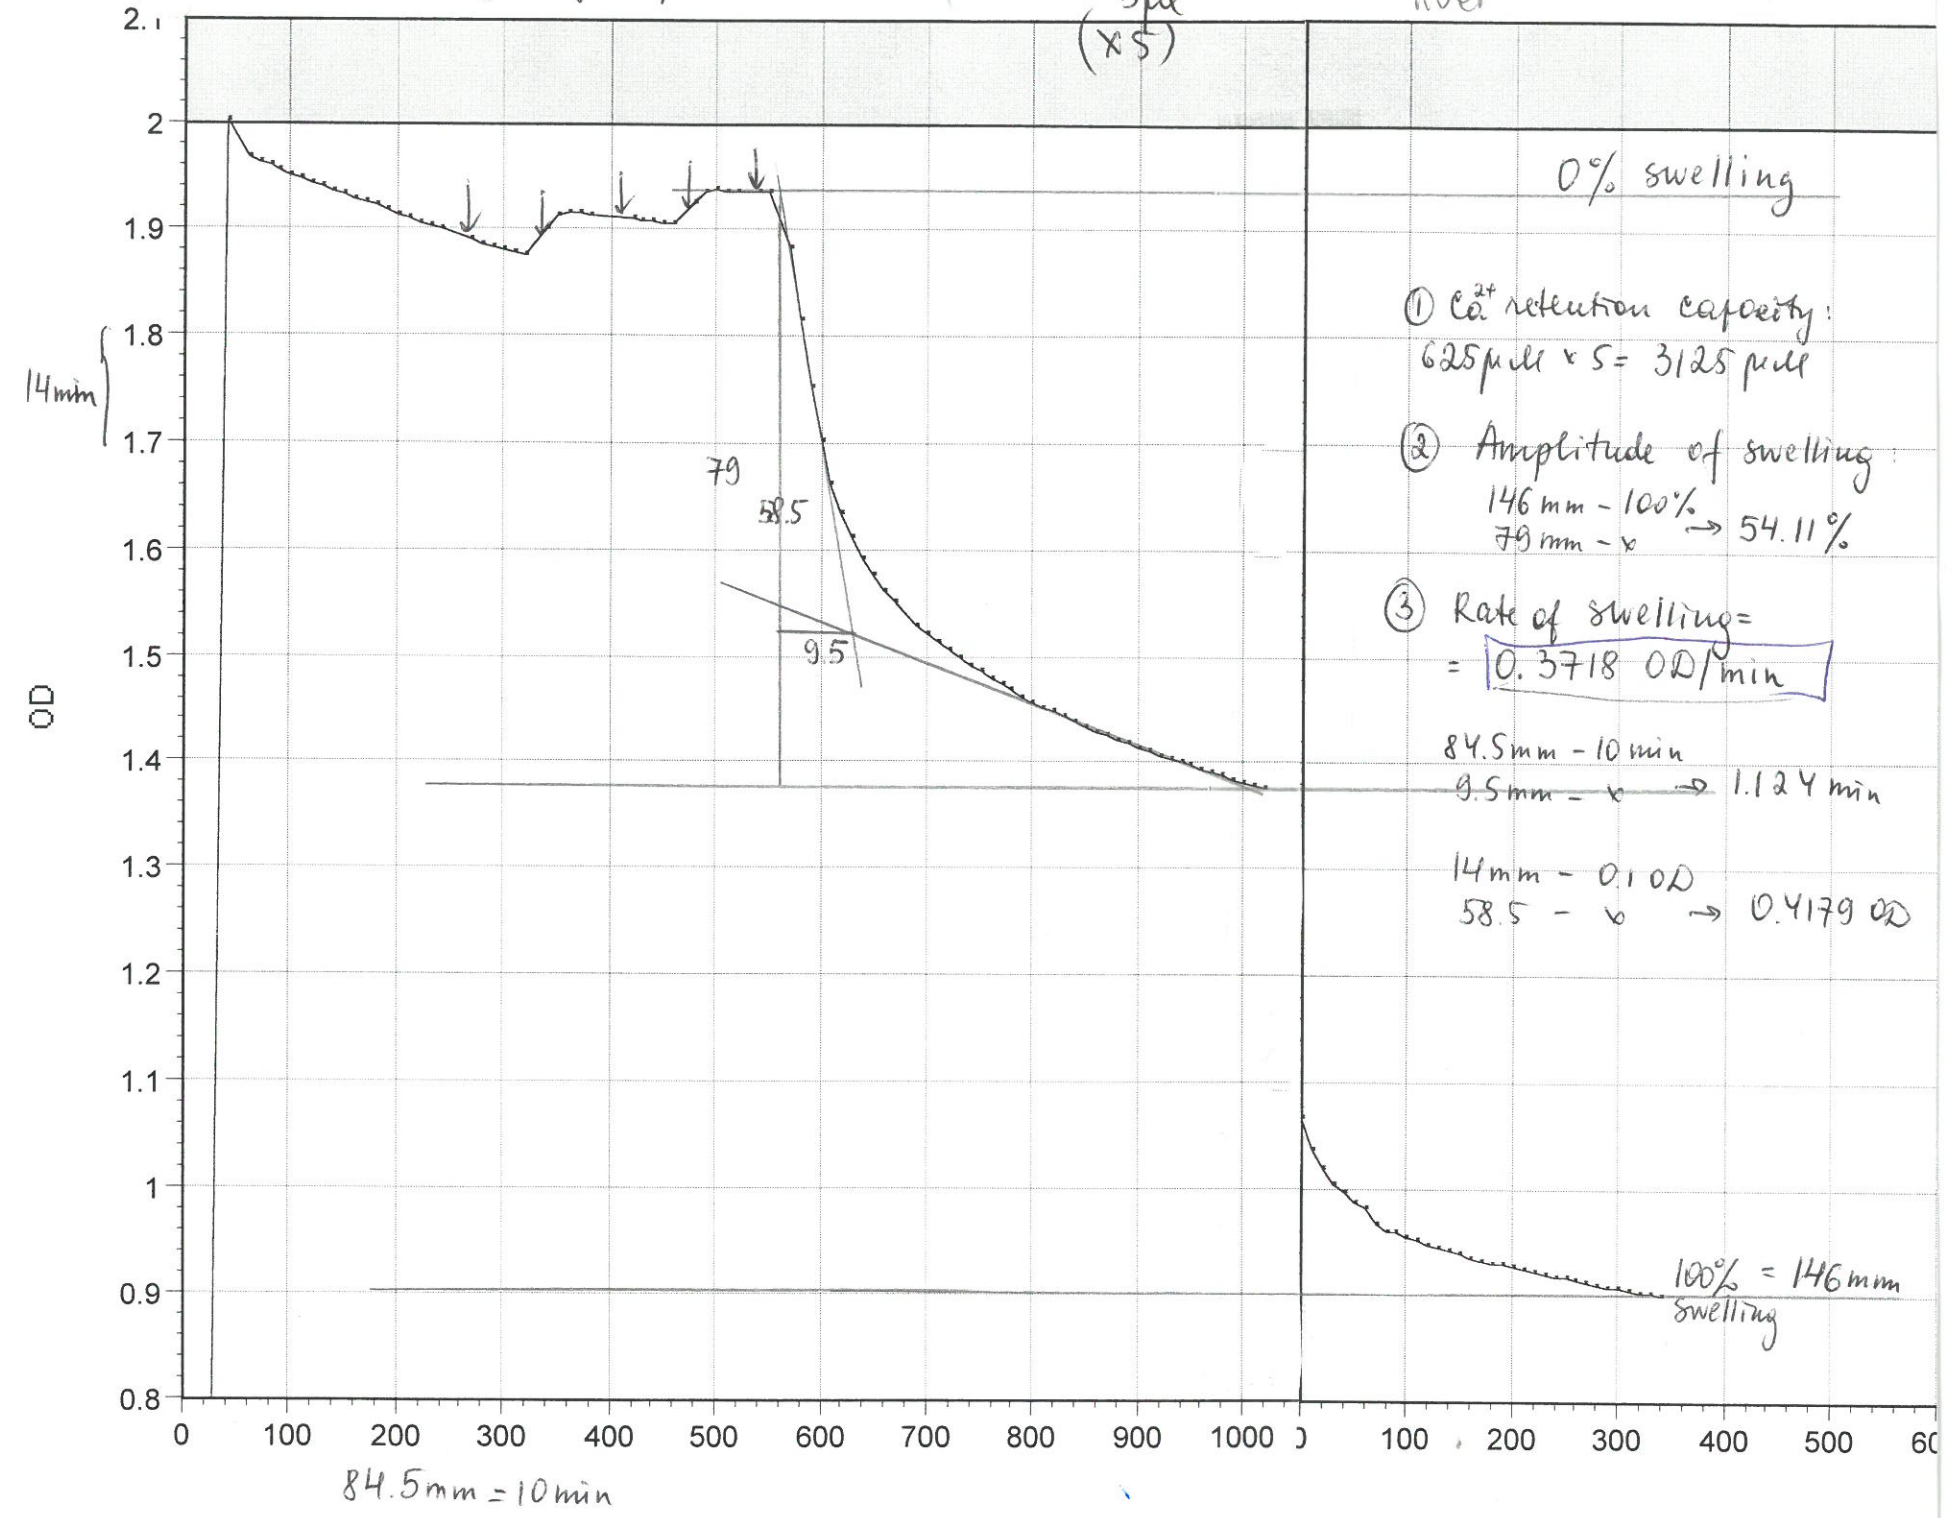

A7

ADP + olig + CsA + FGF2 →

→ 250  $\mu$ l Co (x 6) liver  
(5  $\mu$ l)

FEB 8, 2008

LIVER

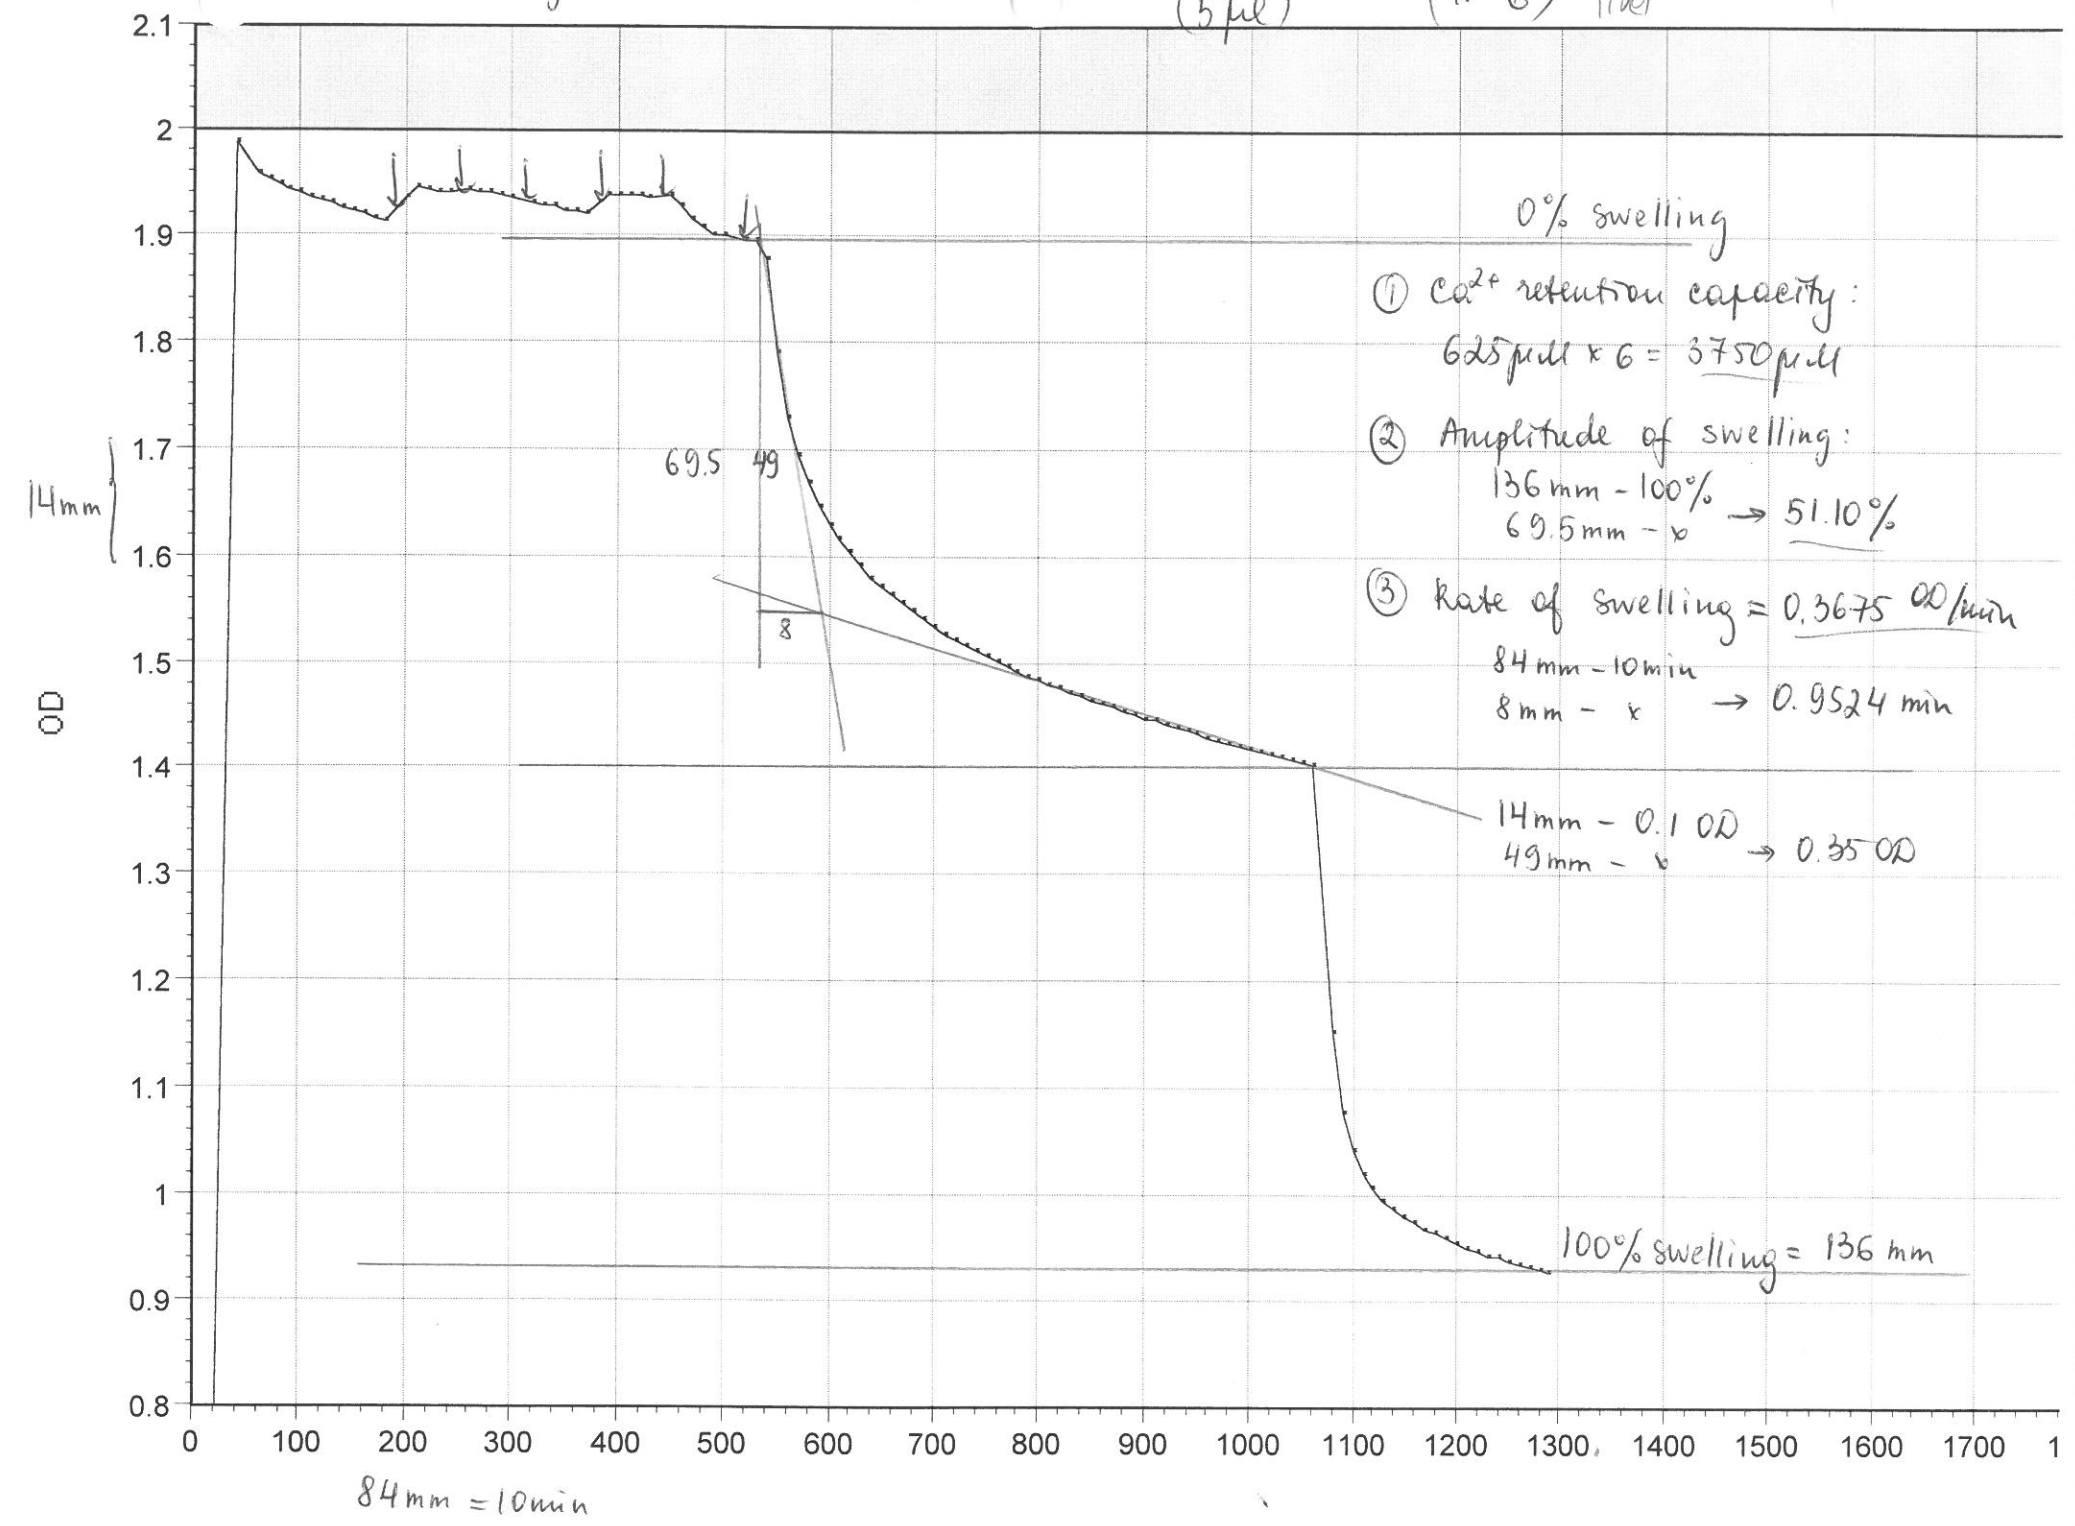



LIVER

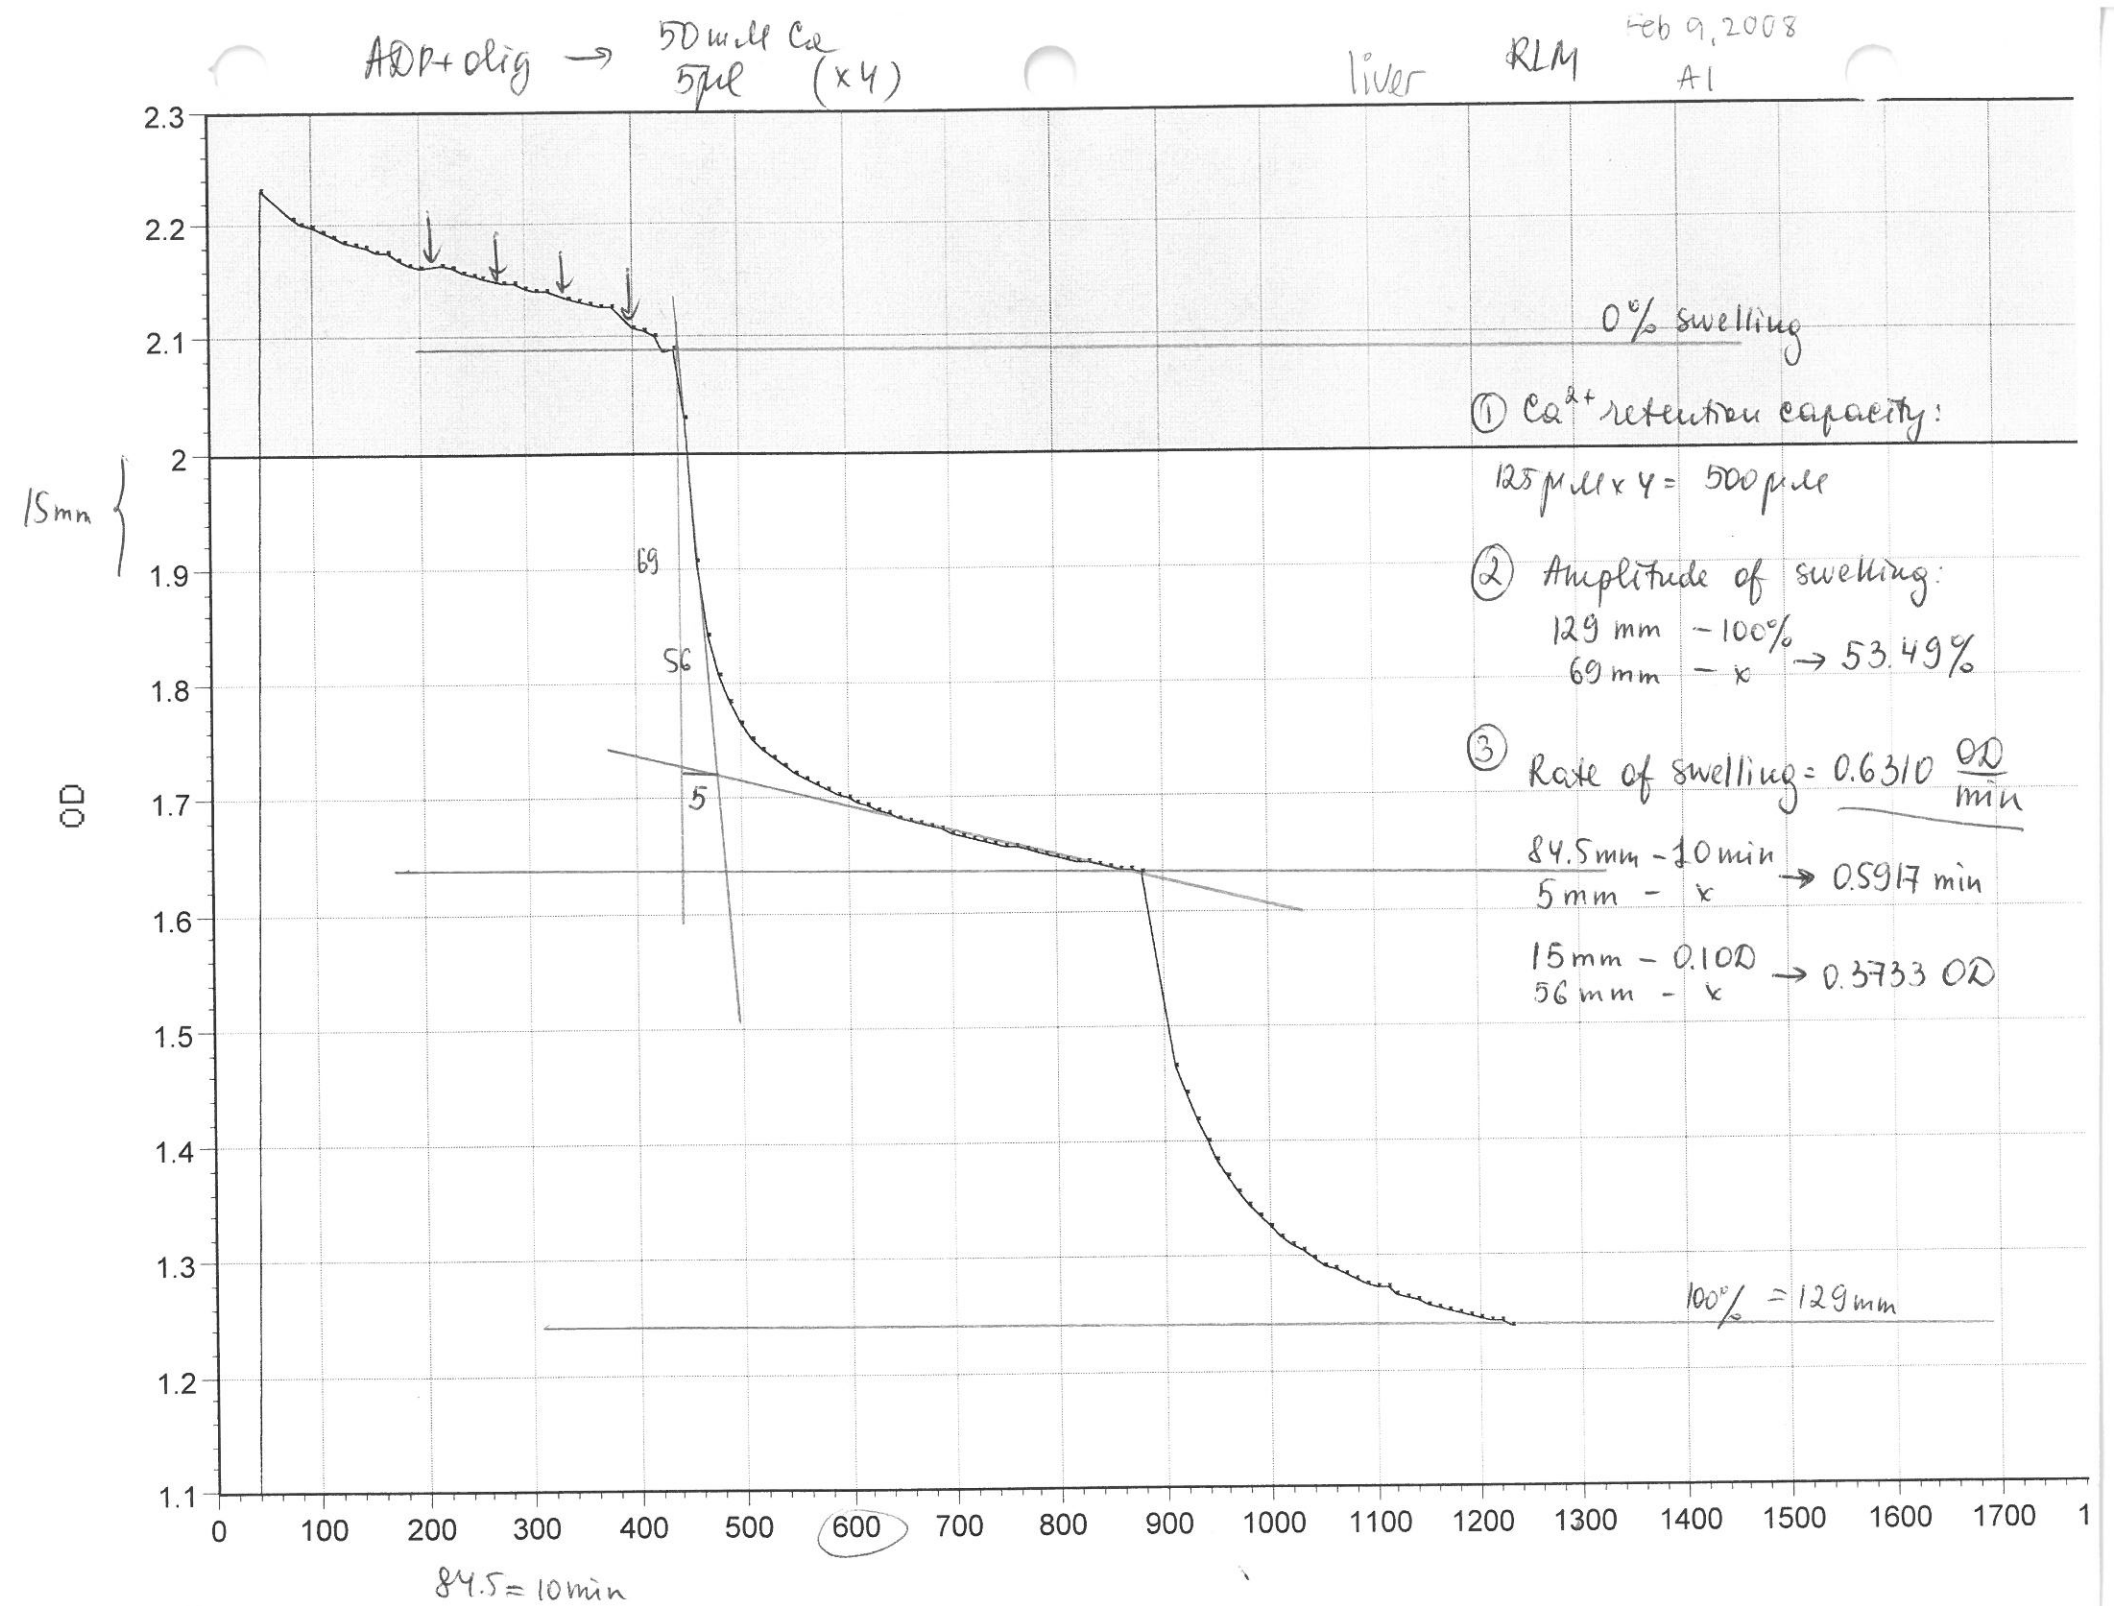

LIVER

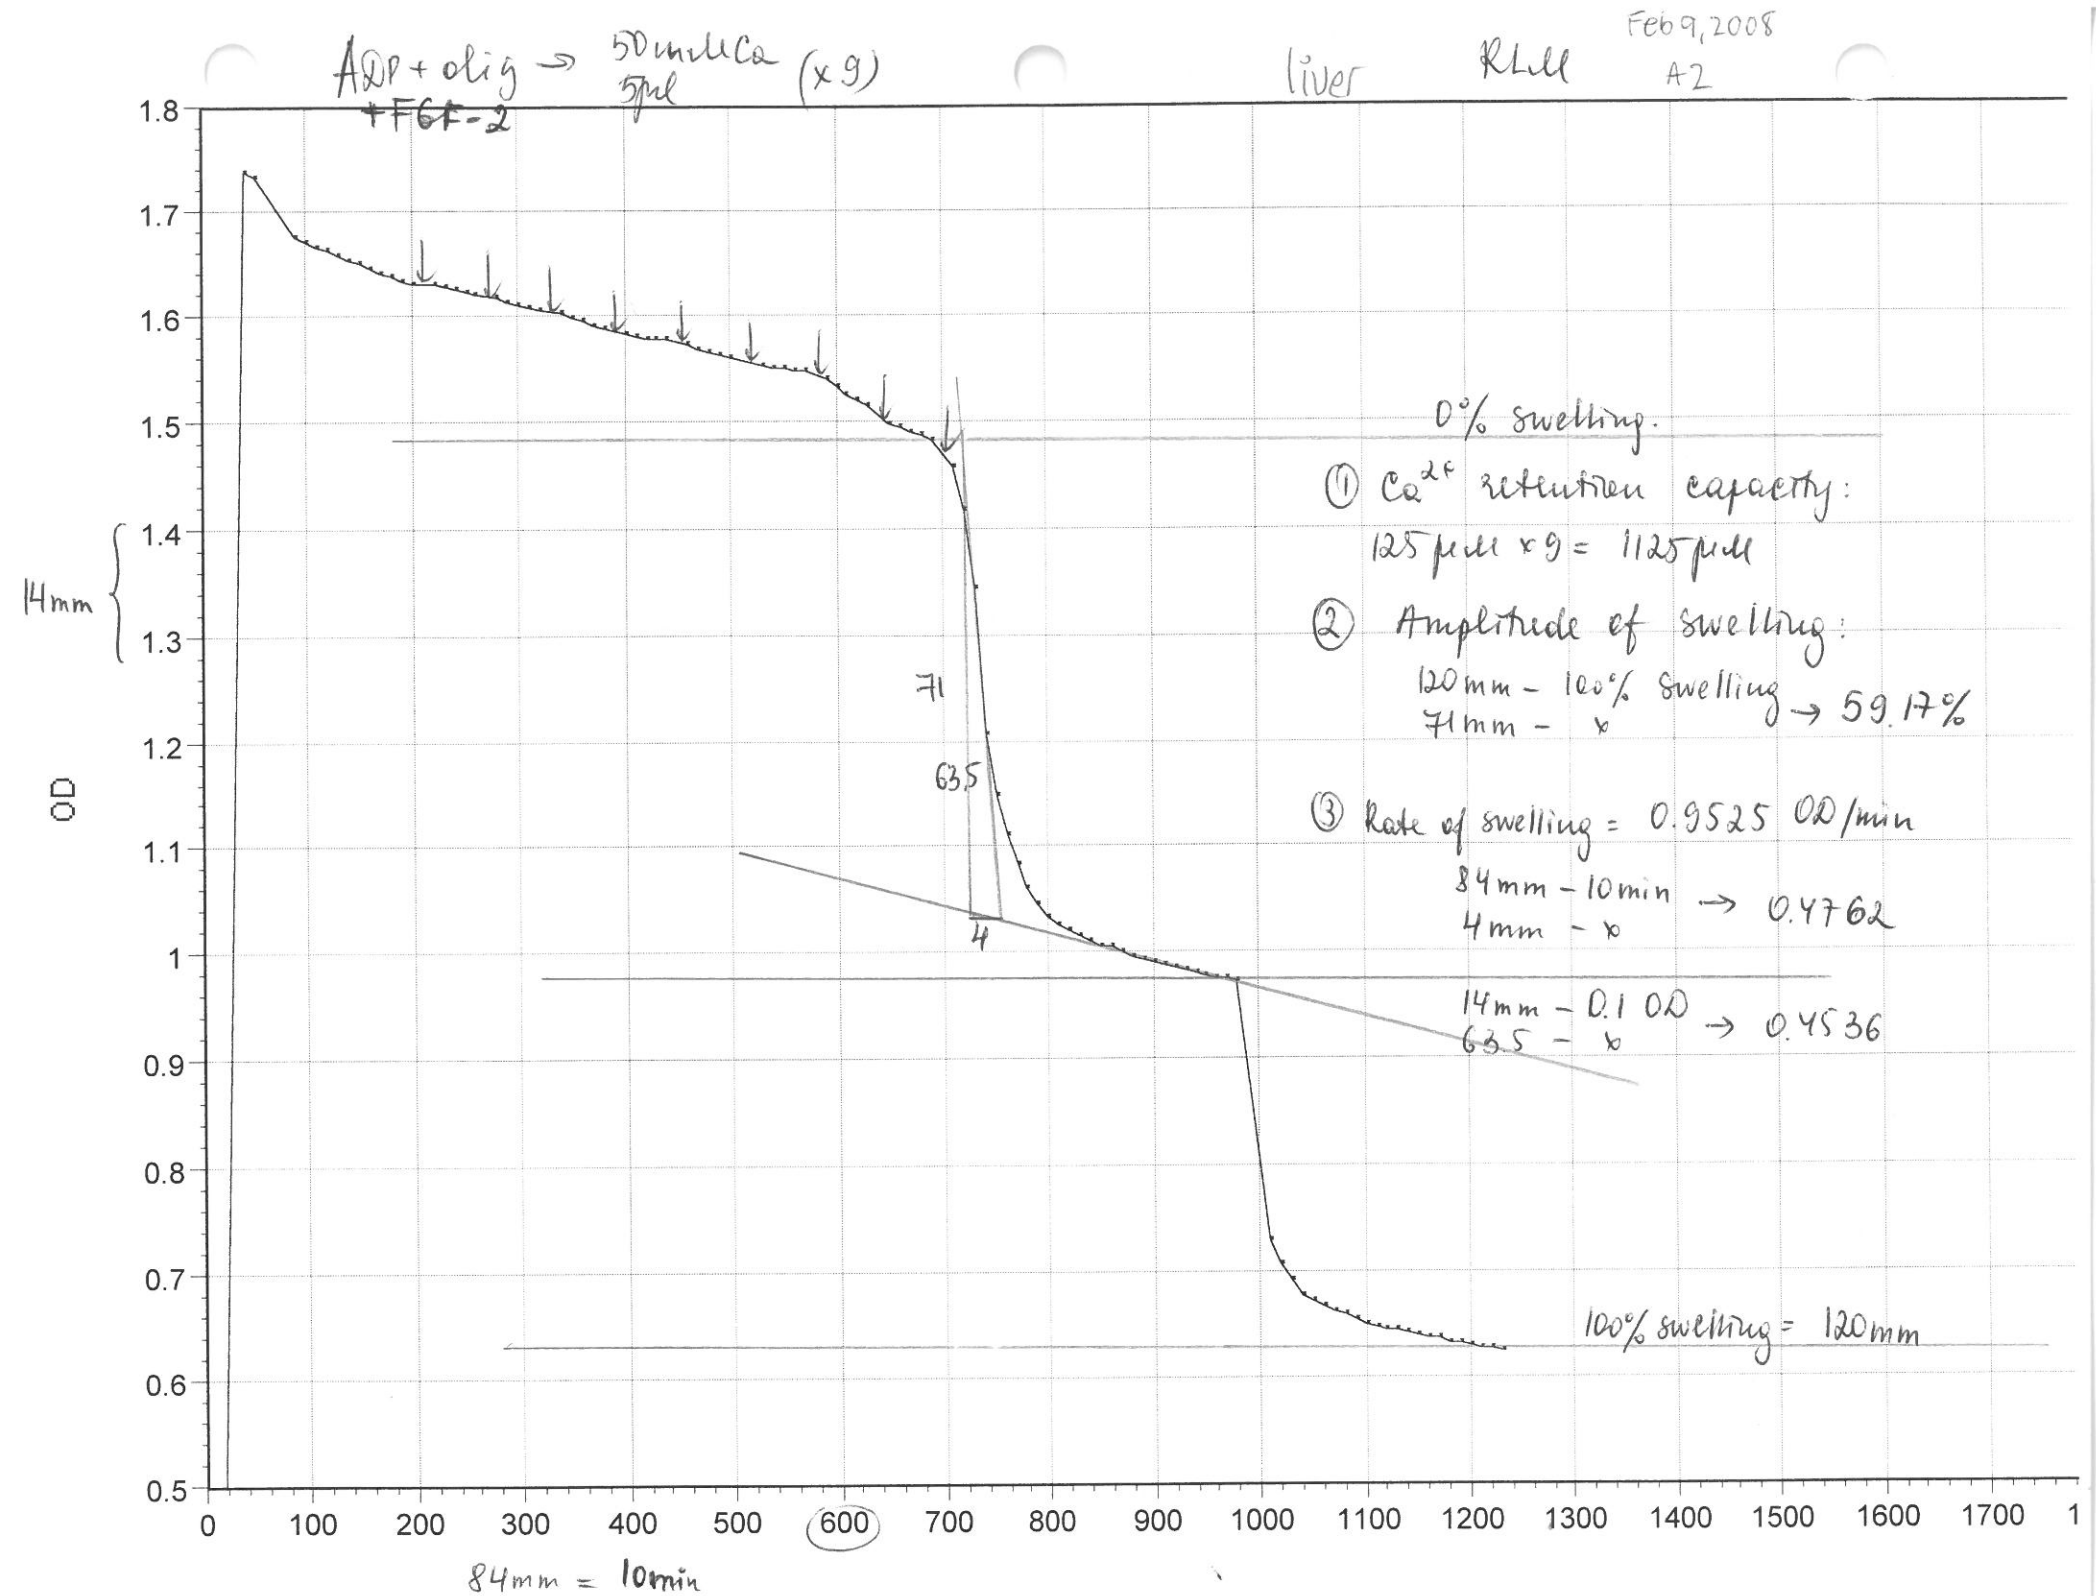

LIVER

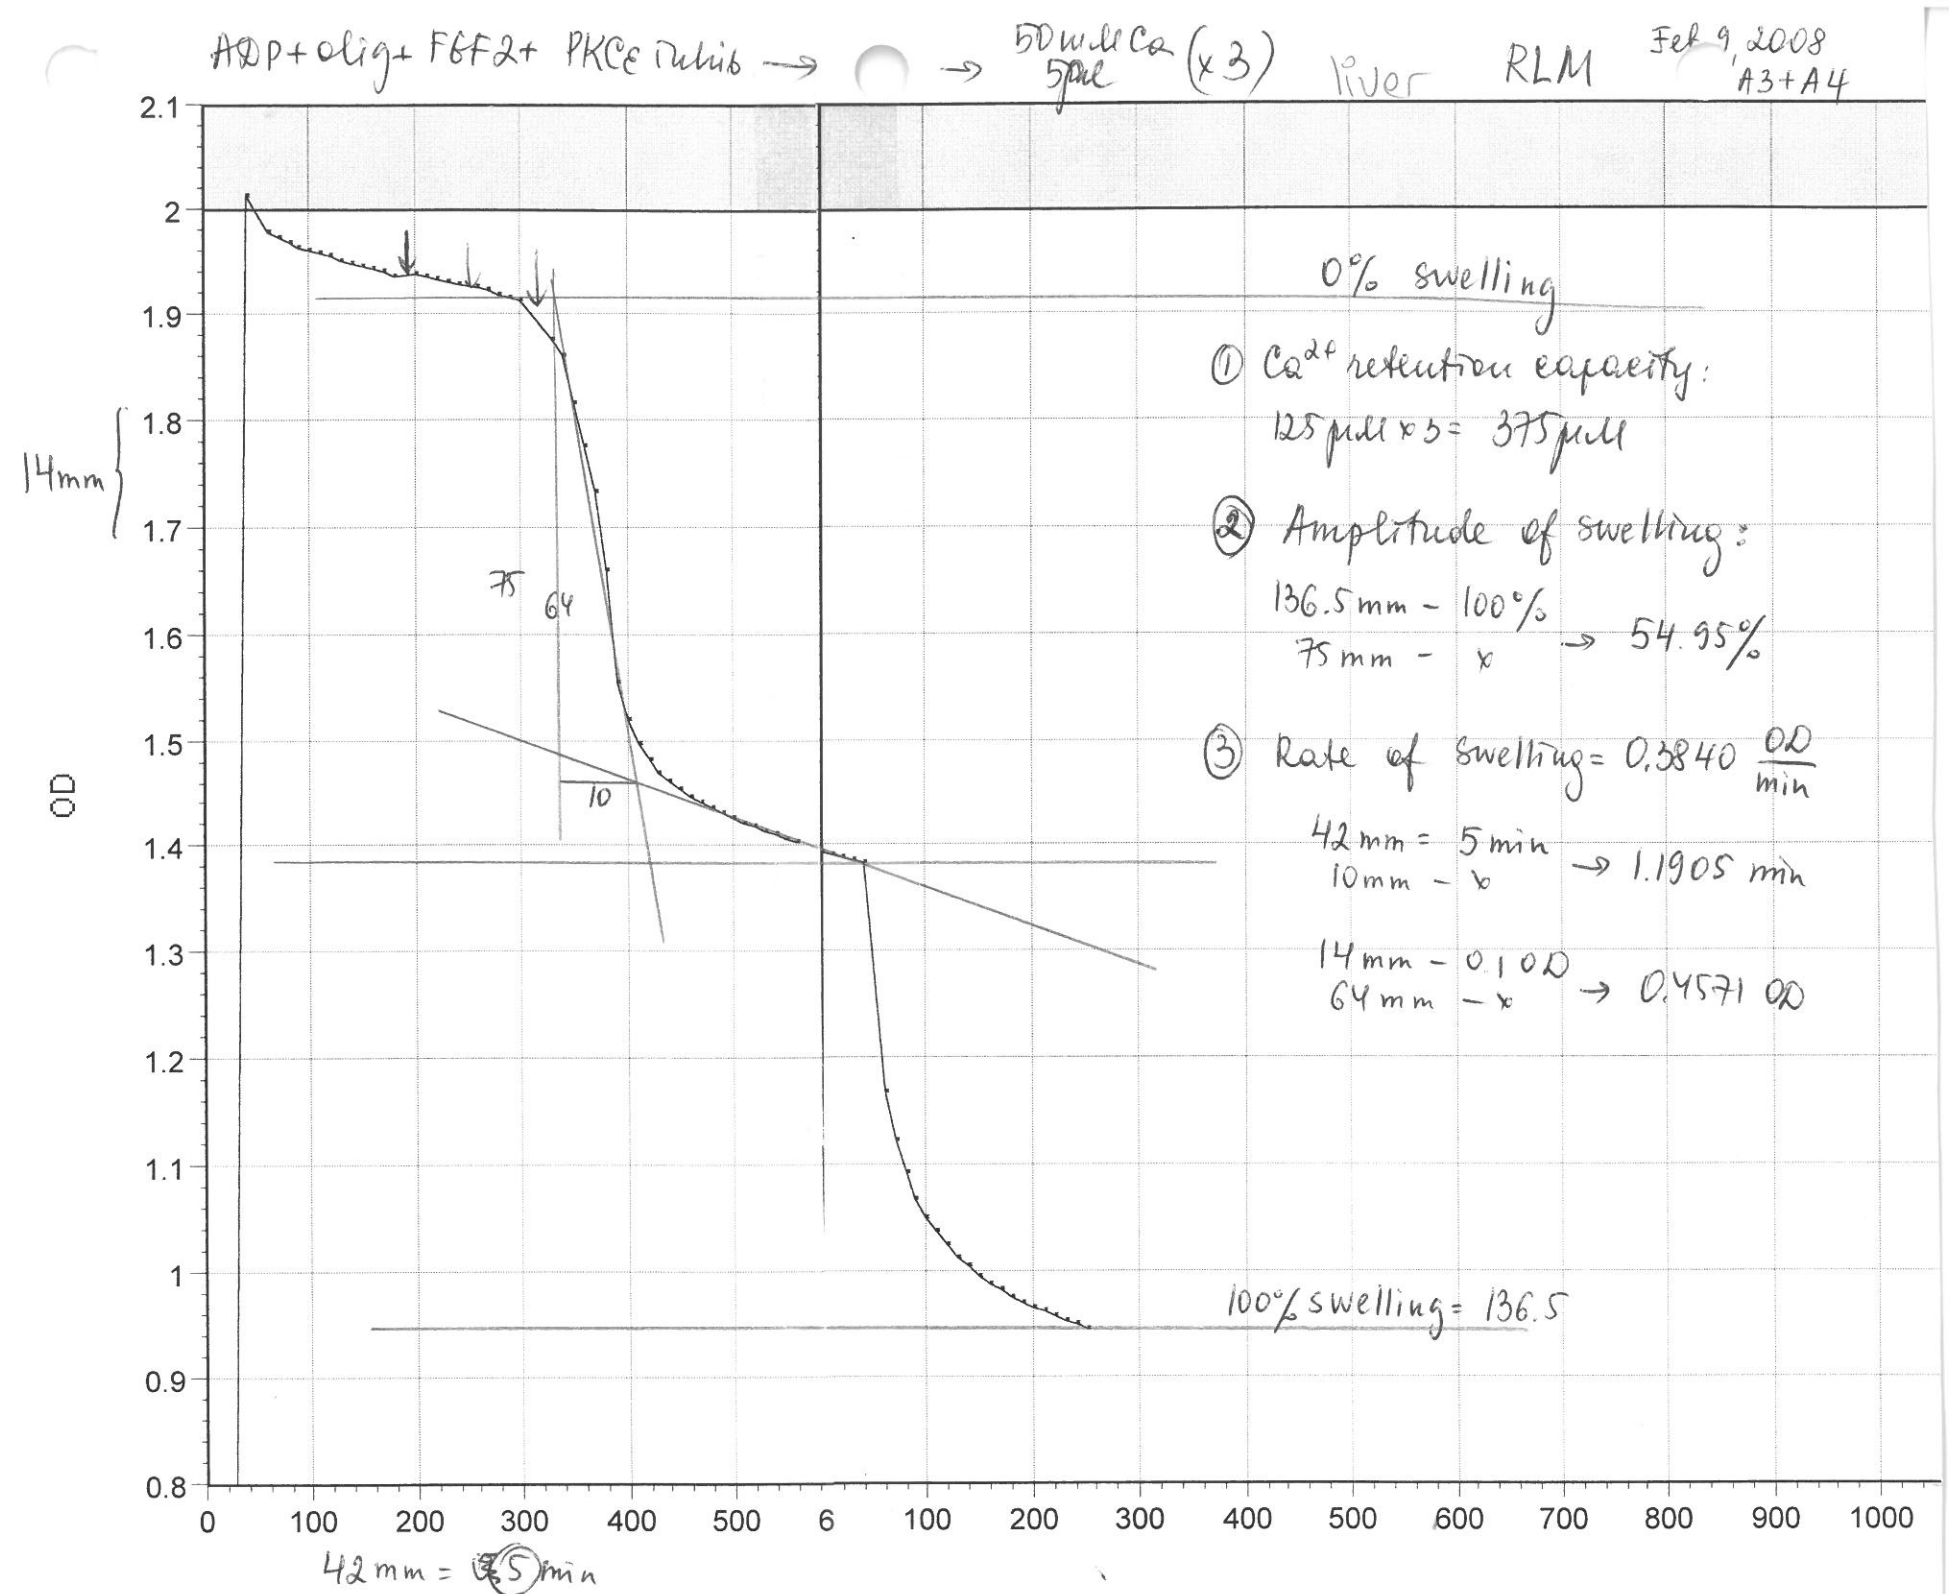



LIVER

ADD + olig + FGF2 + PKCE scrambled →

50  $\mu$ l  $Ca^{2+}$  (x8)  
5  $\mu$ l

liver

Feb 9, 2008  
A5

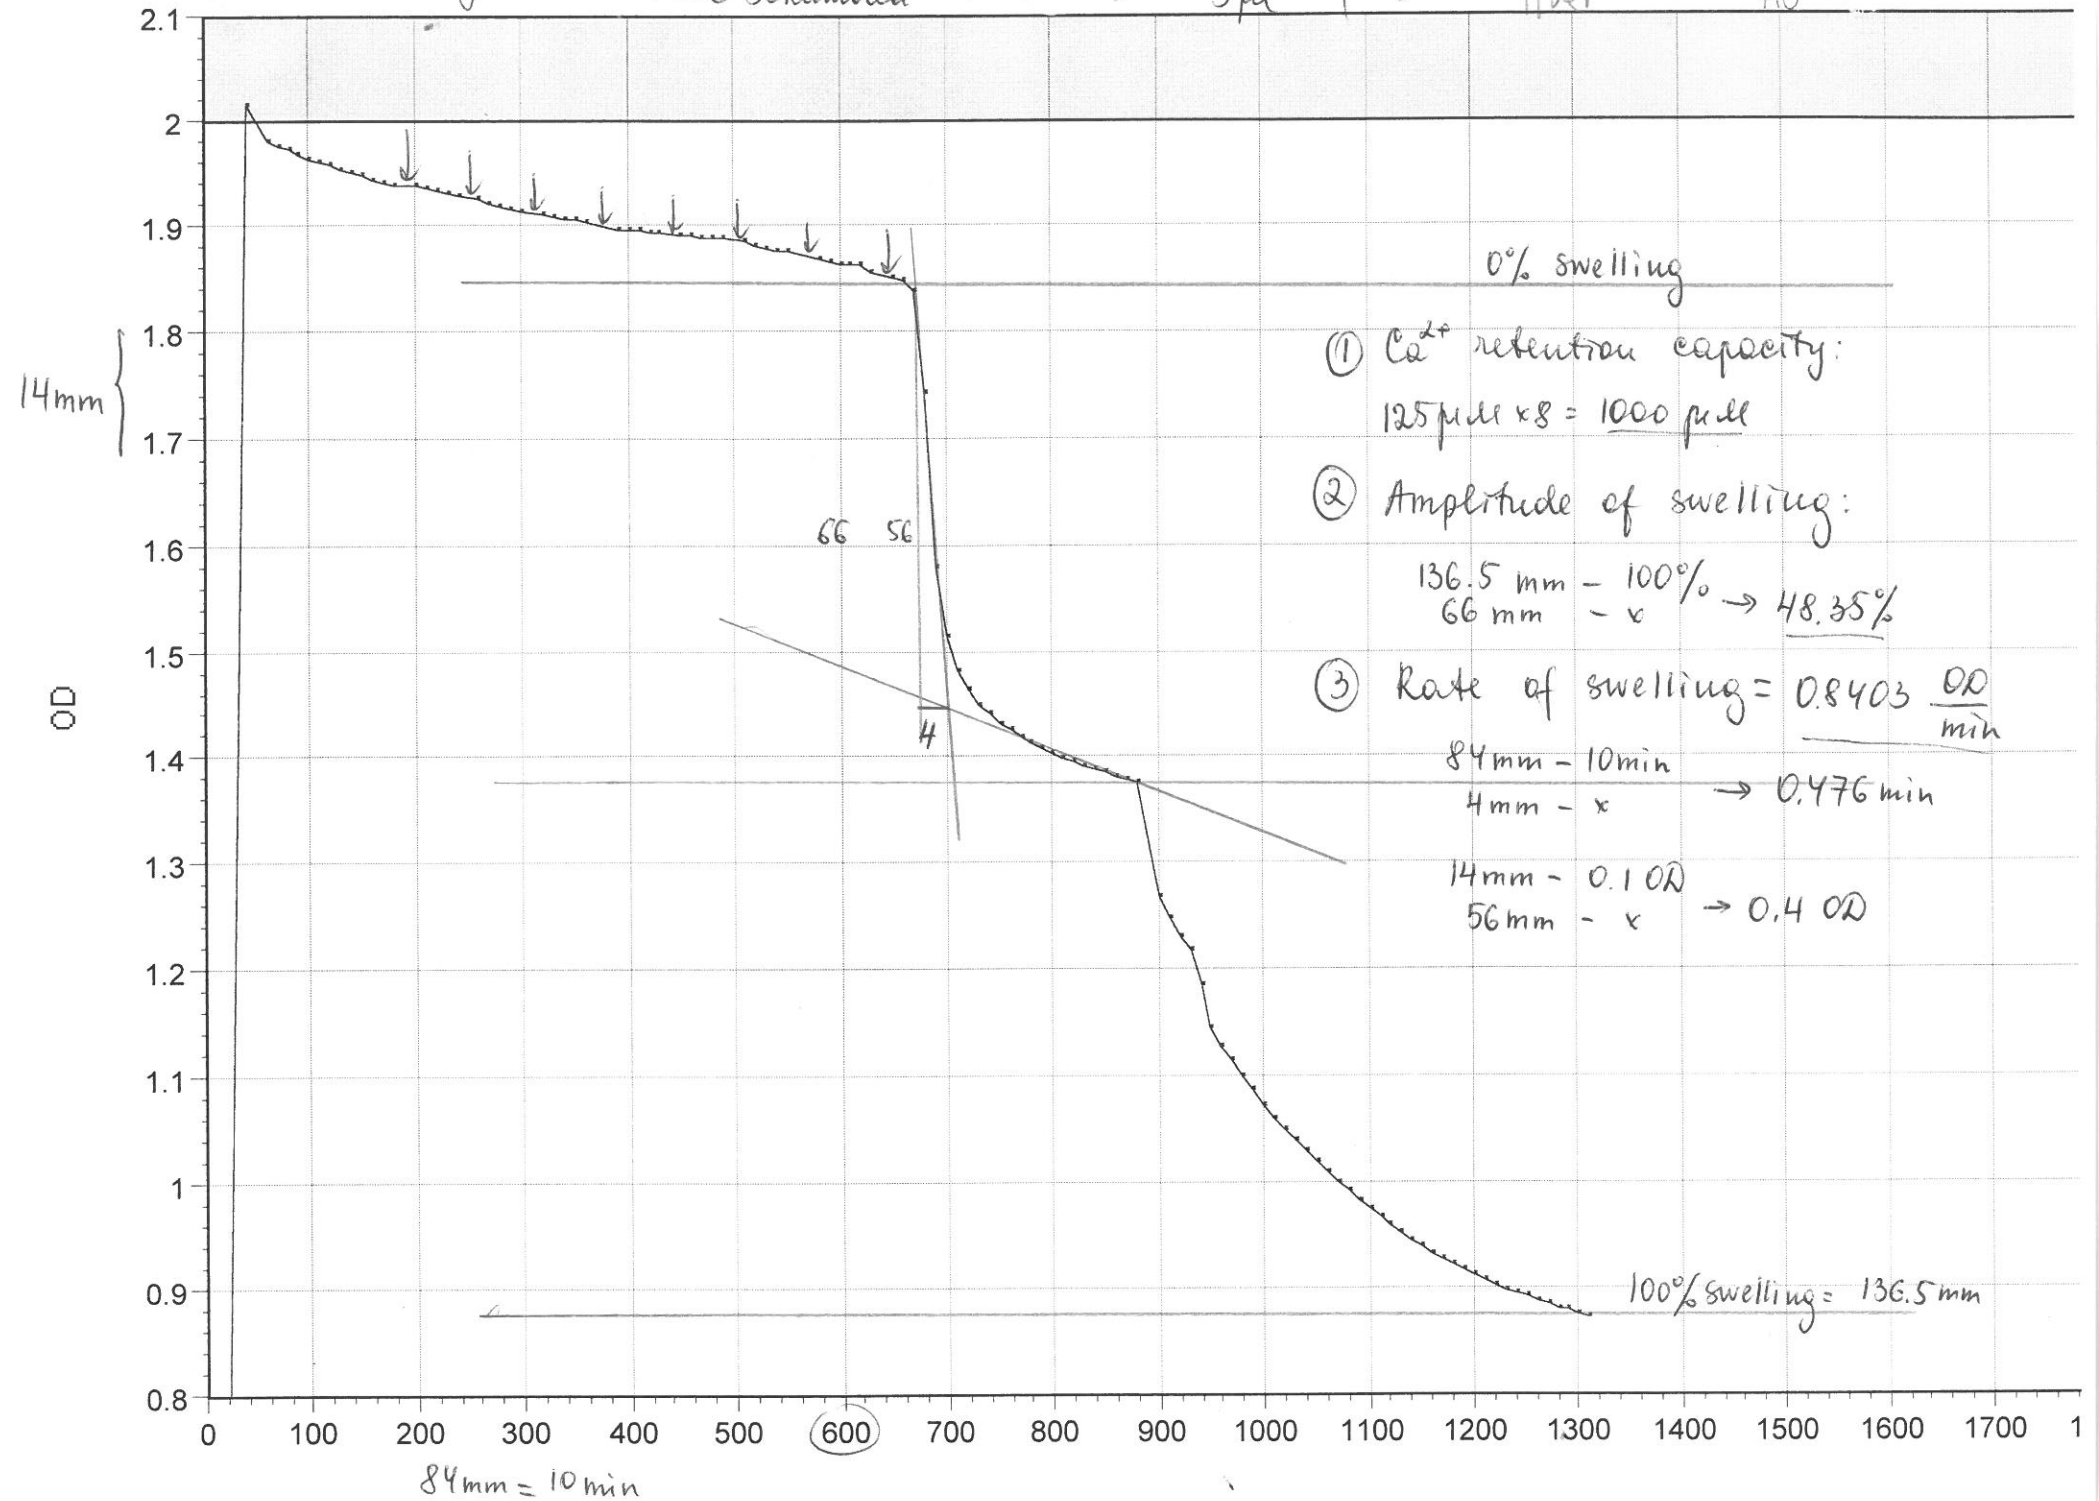

LIVER

(A6)

ADD+ olig → 50 ml C<sub>2</sub> 5 $\mu$ l (x4)

liver

Feb 9 2008

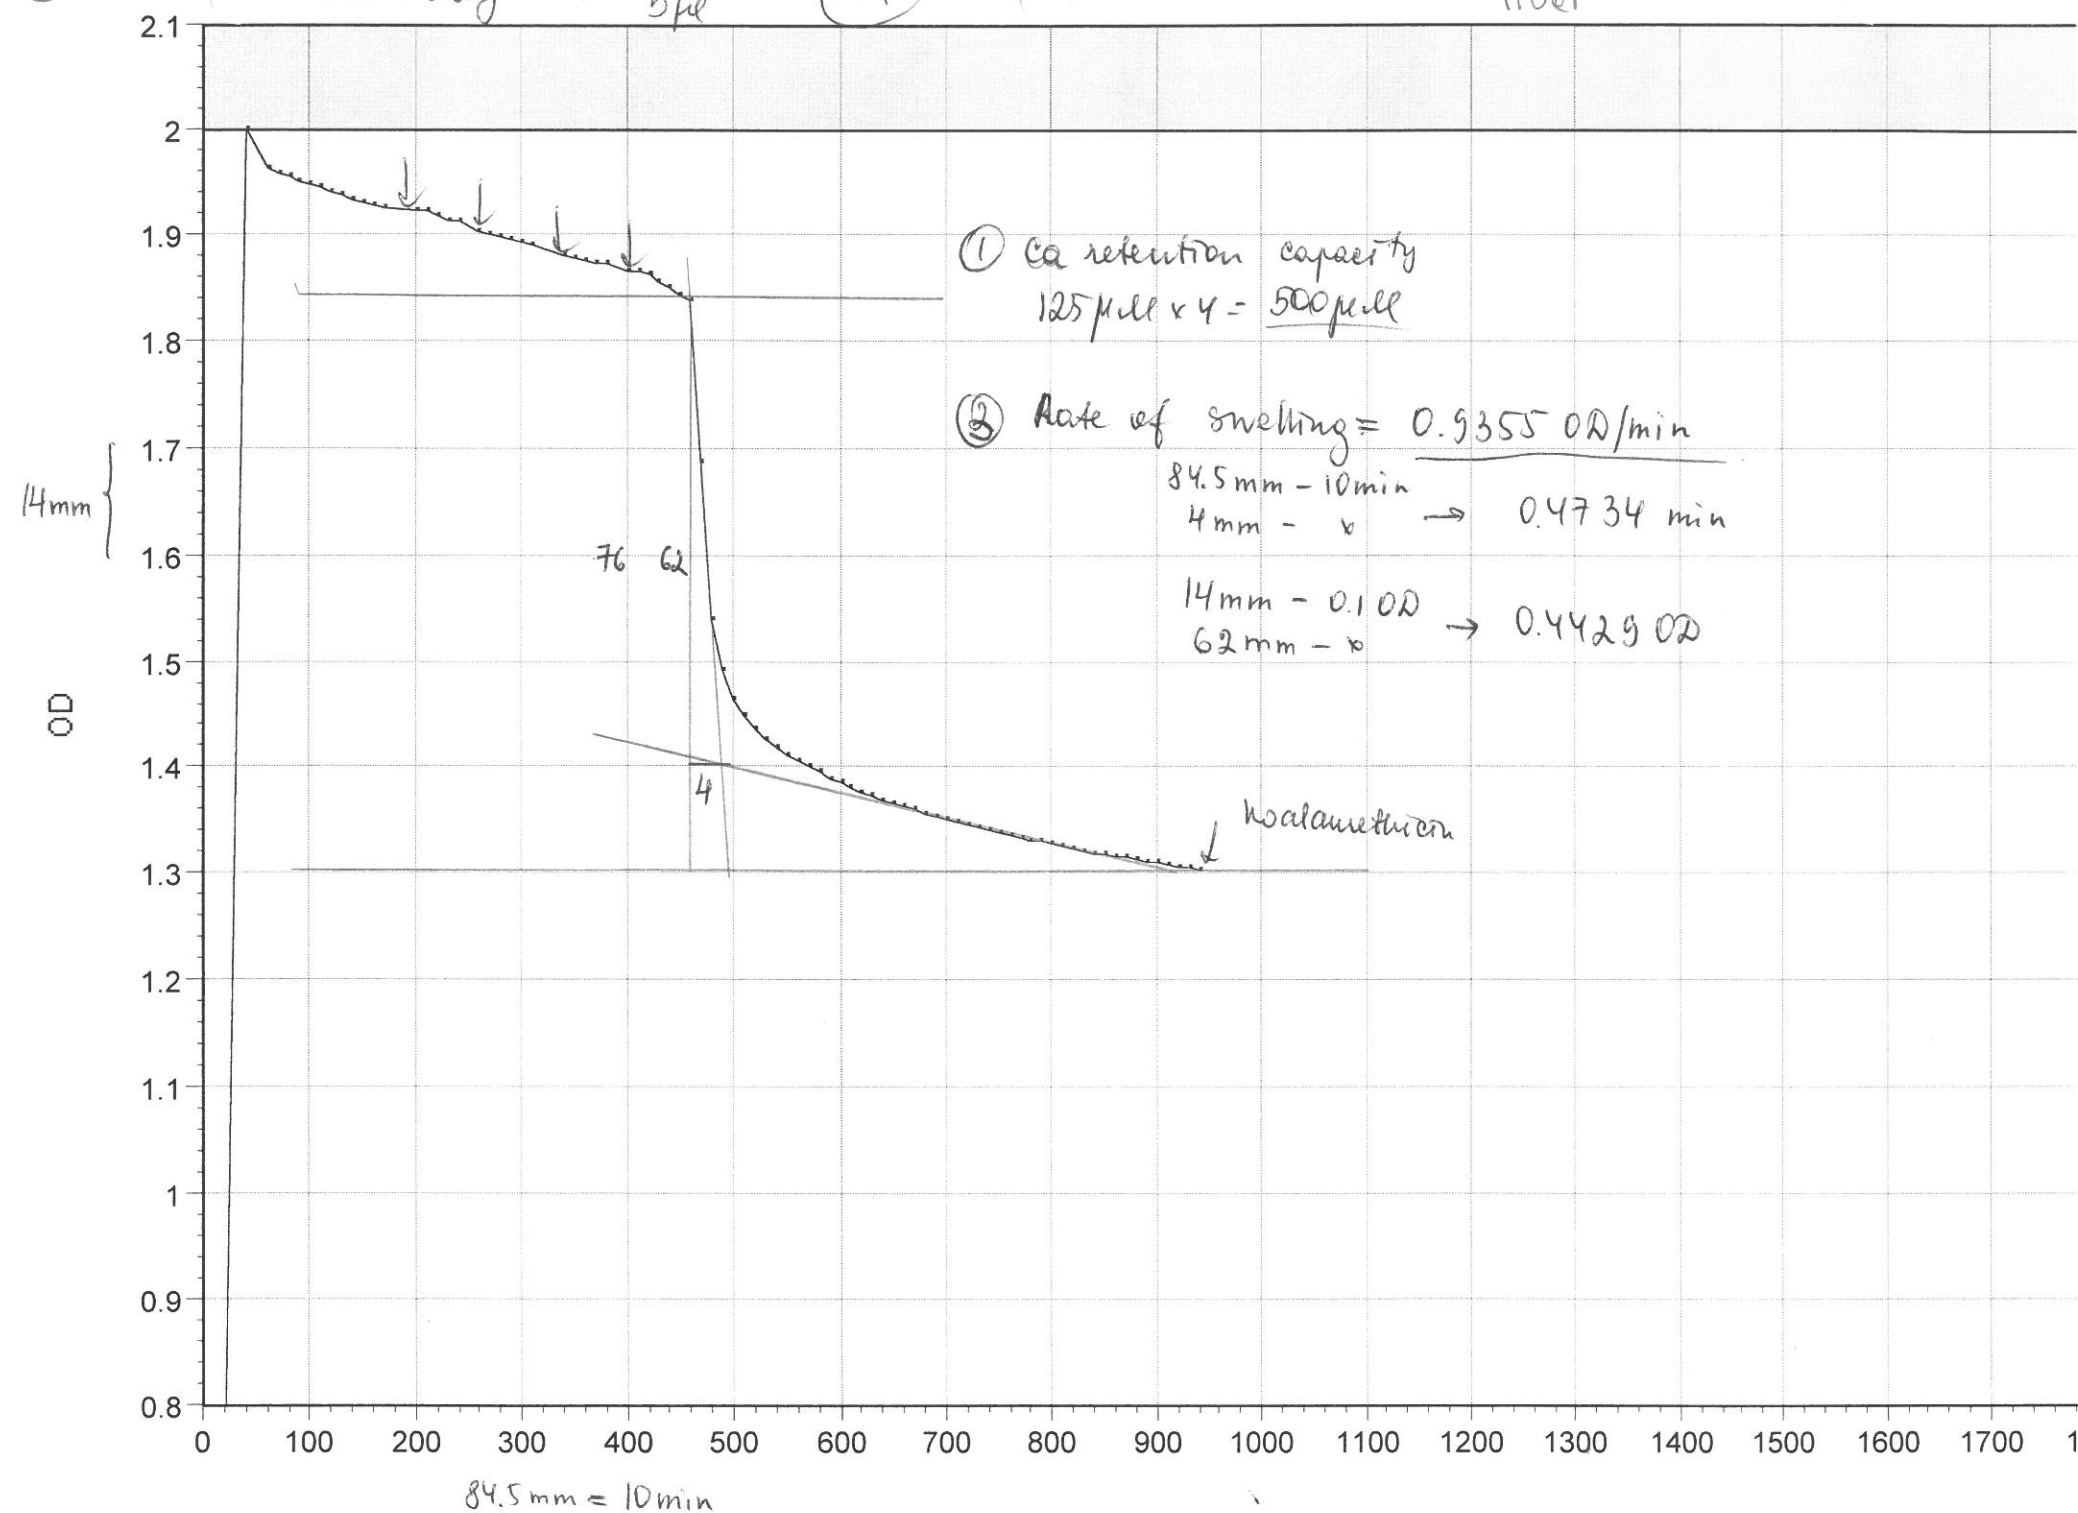

ADP + olig → 50  $\mu$ M Ca (x4)  
5  $\mu$ M

liver

RLM

A7

Feb 9, 2008

LLIVER

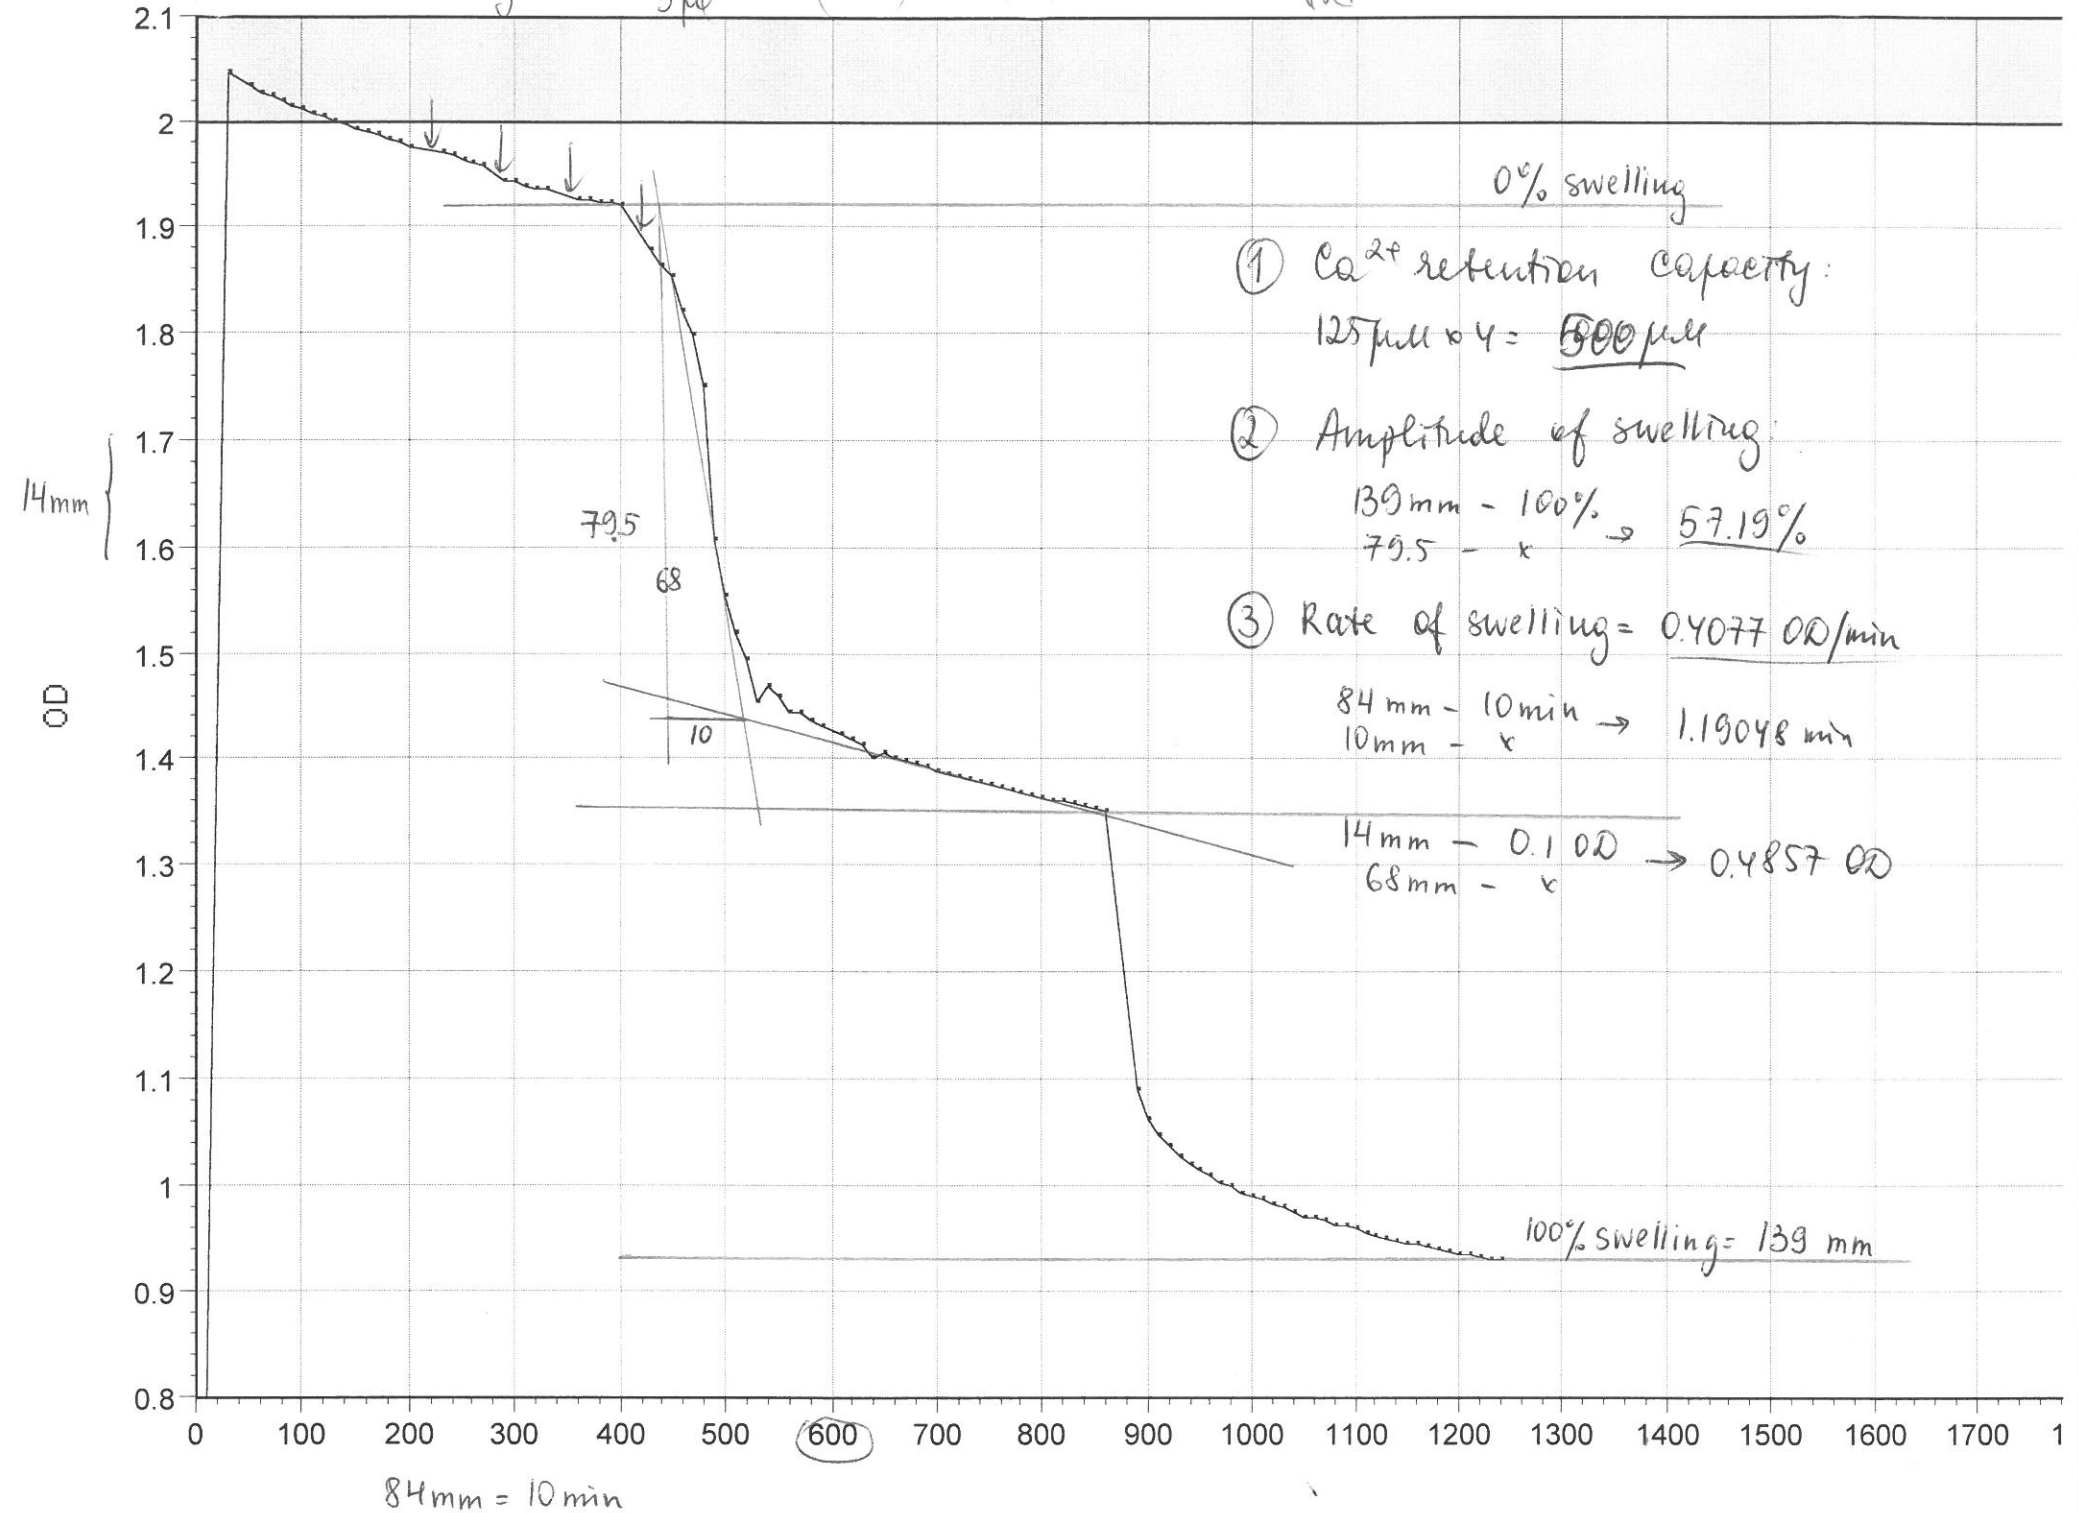



Original blots for Fig.3

Fig.3a

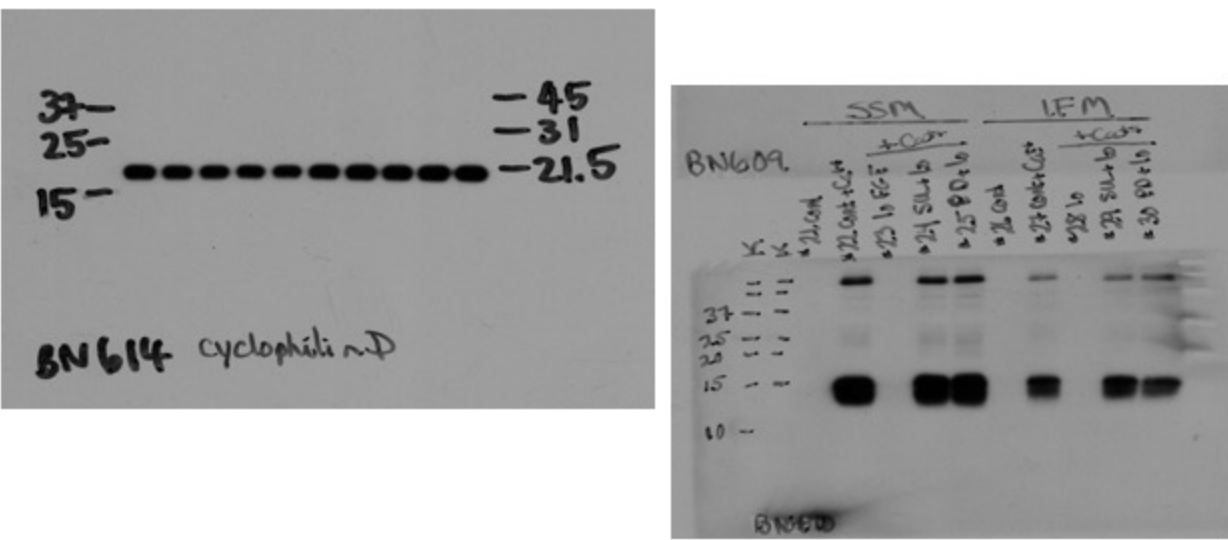

Fig.3b

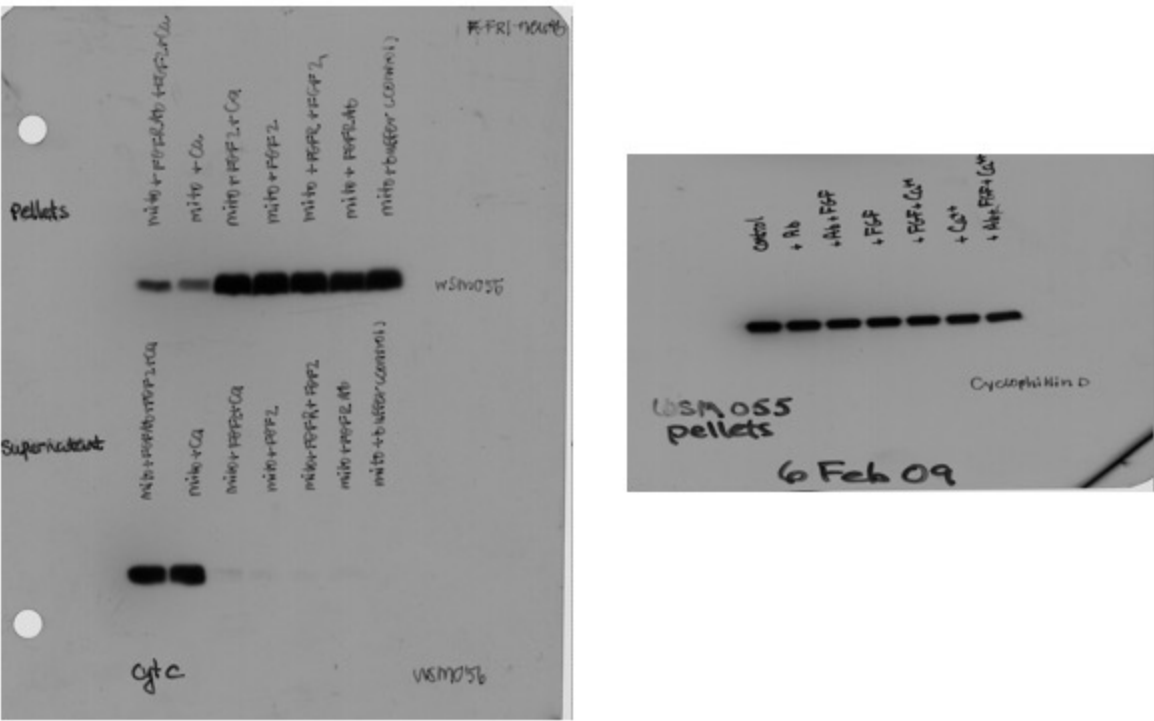

## Original blots for Fig.2a

x anti-FGFR1, QED A/B.

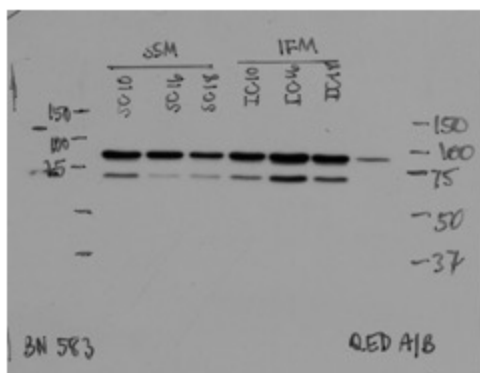

x anti-pY766-FGFR1

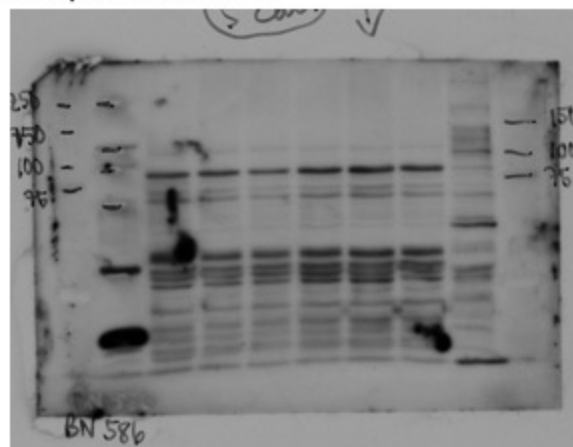

x anti-pY653/654-FGFR1.

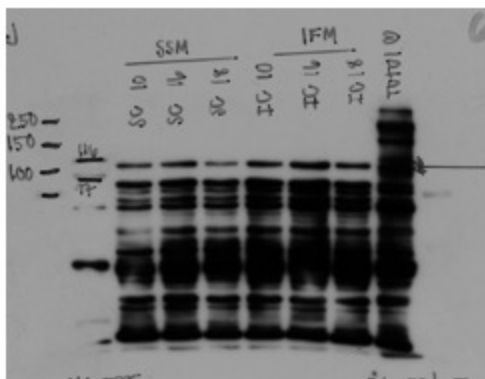

Ponceau S stain

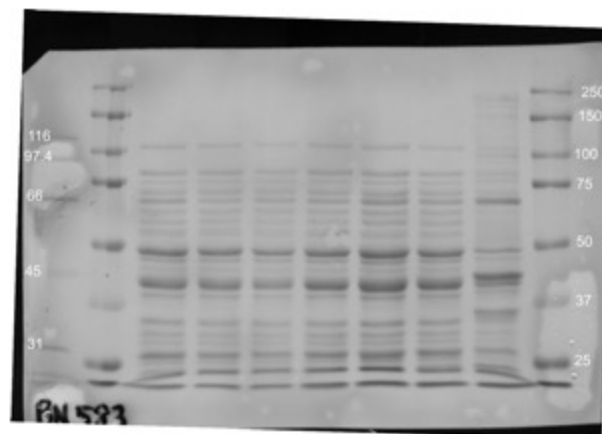

Original  
images  
for  
Fig.2b

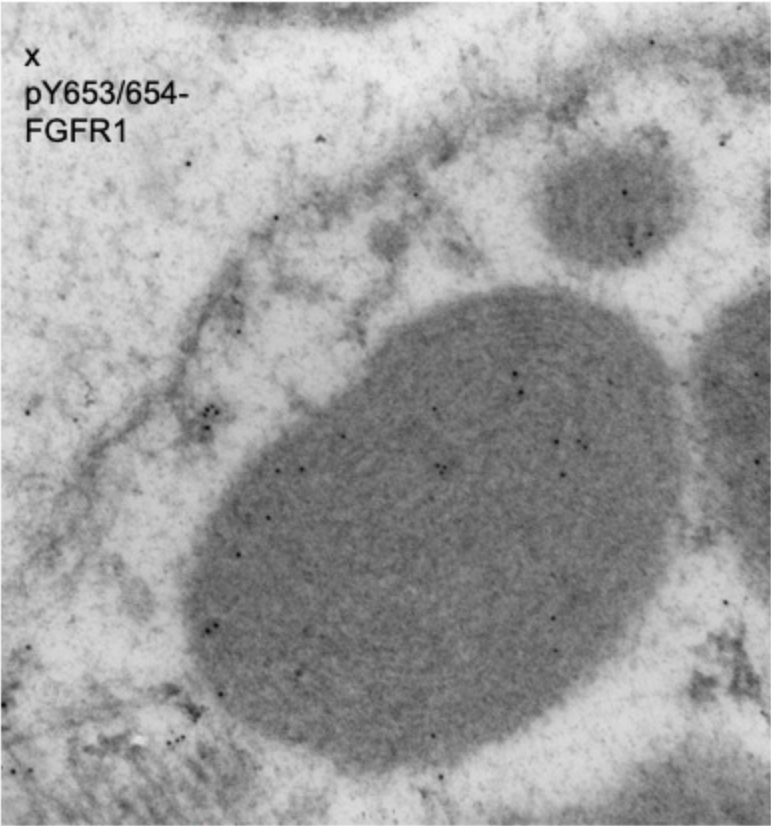

*Mislabeled-* heart-pY653-654-FGFR-sigma-2.tif  
HEART SECTION  
Print Mag: 116000x @ 7.0 in  
11:57 10/31/08  
ito

100 nm  
HV=80.0kV  
Direct Mag: 100000x  
Facility of Medicine EM Unit

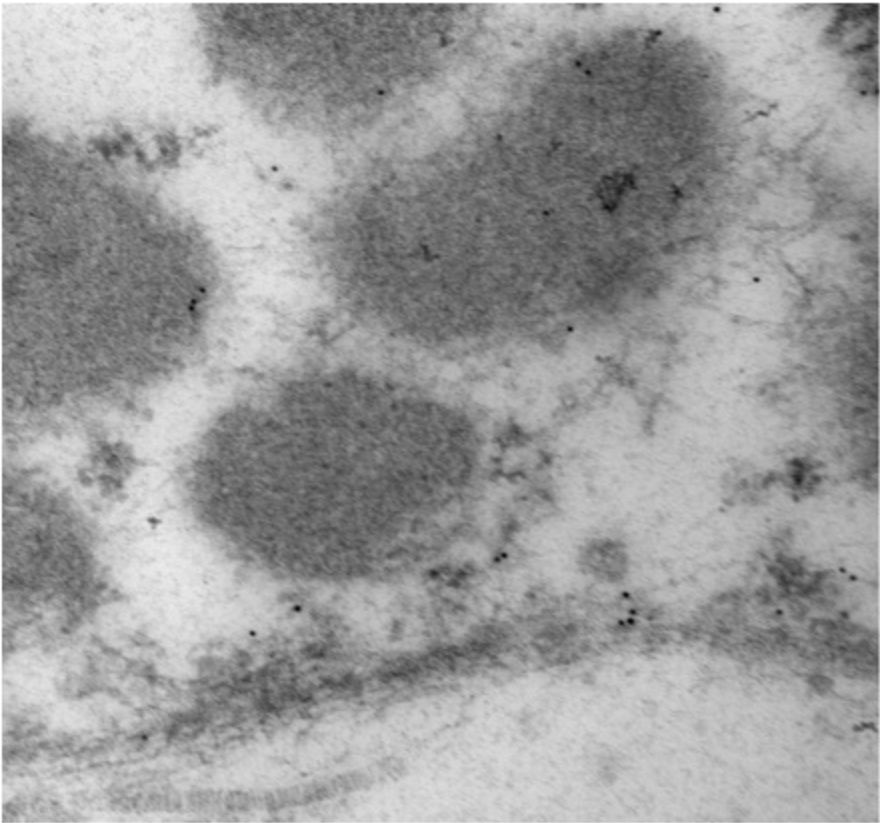

100 nm  
HV=80.0kV  
Direct Mag: 120000x  
Facility of Medicine EM Unit



Original blots for Fig.4

Fig.4b

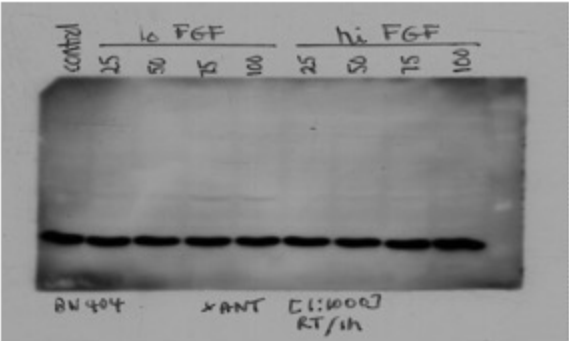

Fig.4a

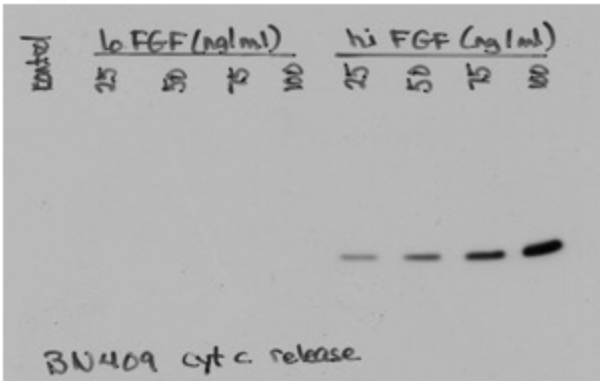

Fig.4c

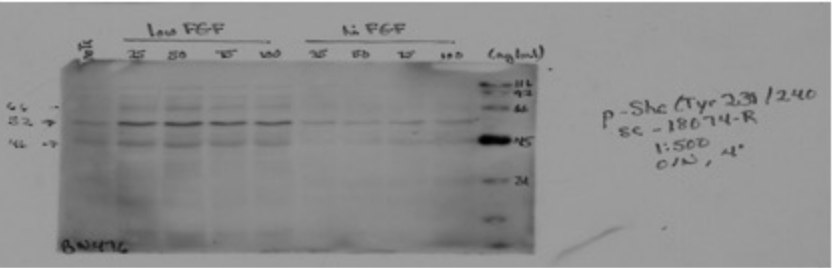

Fig.4d

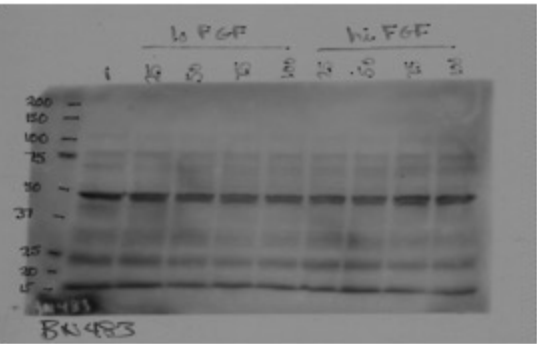

Fig.4e

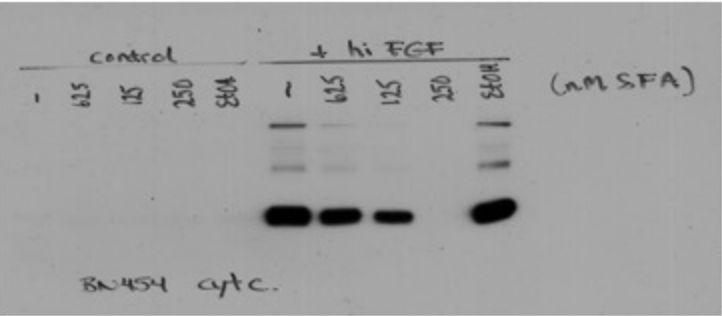

Original blots for Fig.5

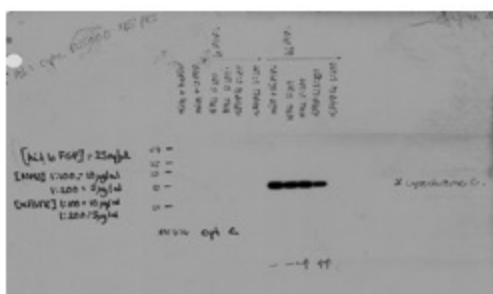

Fig.5a

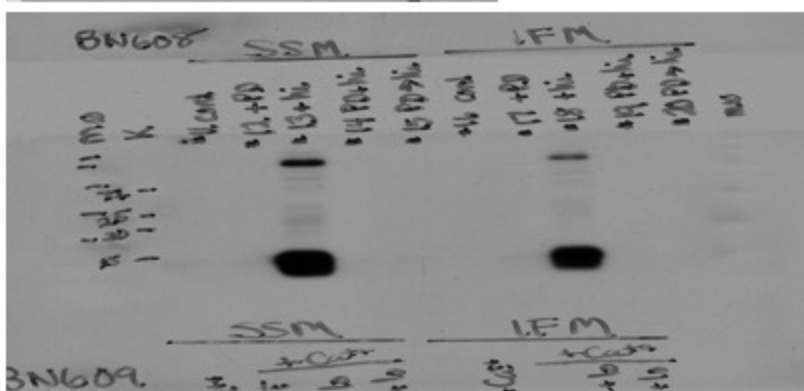

Fig.5b

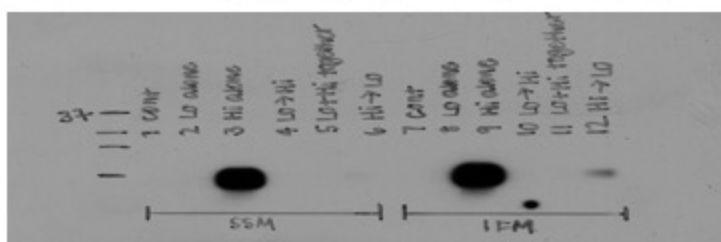

Fig.5c

Fig.5e

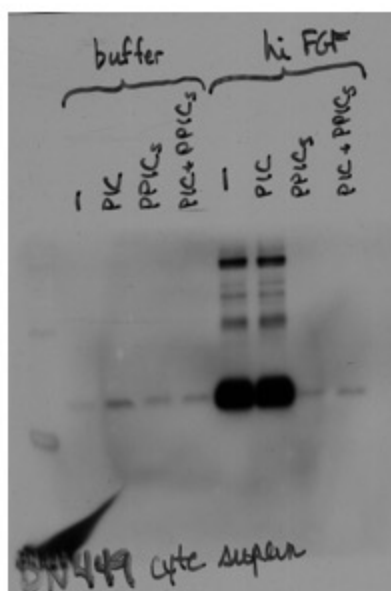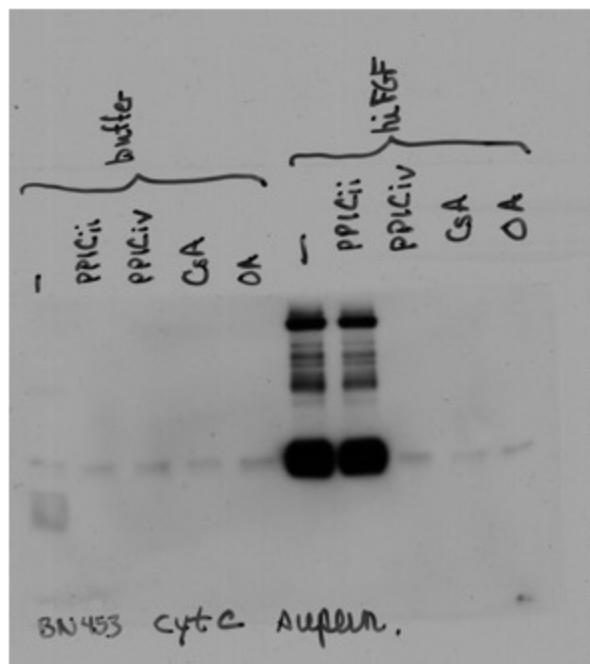

Repeat experiment: SSM and IFM preparations probed  
with anti-pY653/654-FGFR1

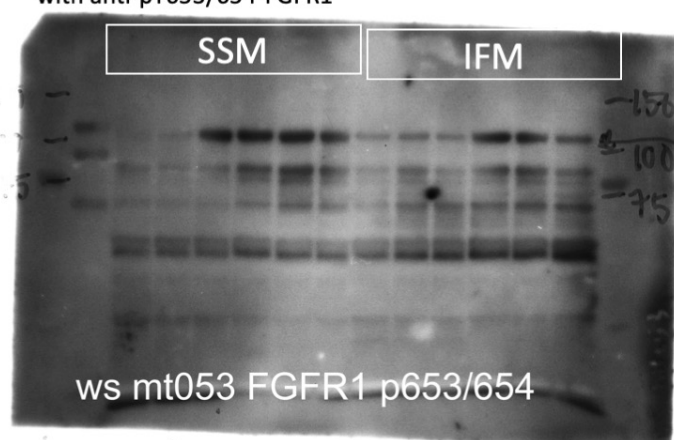

Repeat experiment: SSM and IFM preparations probed  
with anti-pY653/654-FGFR1

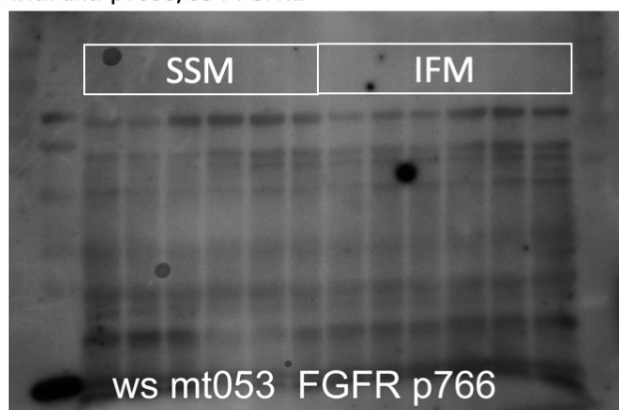



Repeat experiments: Western blots showing supernatant cytochrome c after exposure to Hi-FGF2, and Lo-FGF2

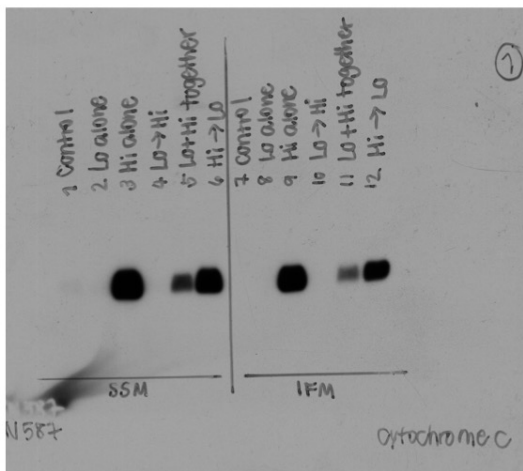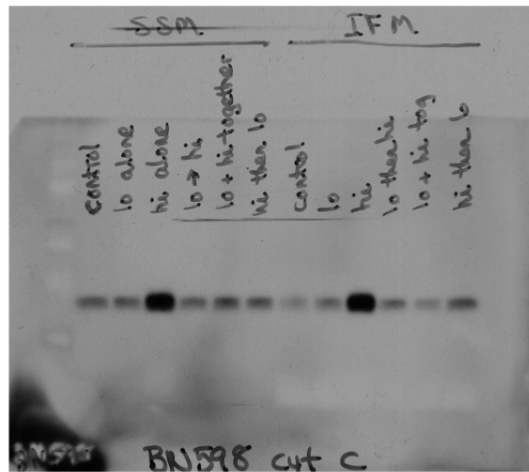

Repeat experiments: Western blots showing supernatant cytochrome c after exposure to Hi-FGF2 in the presence of non-immune antibodies (upper gel) or neutralizing antibodies (lower gel)

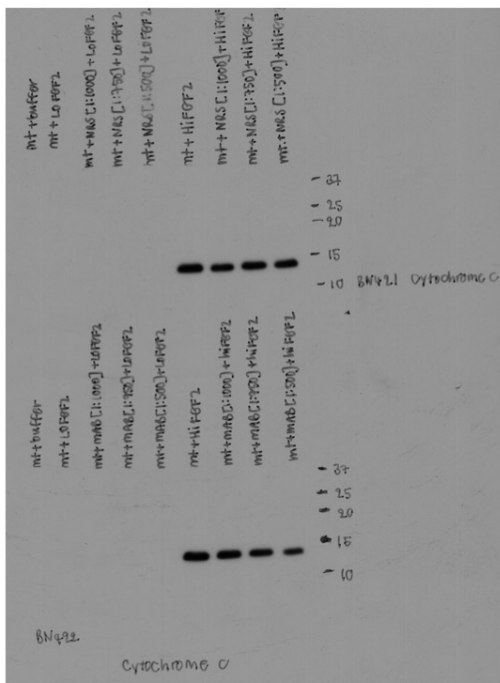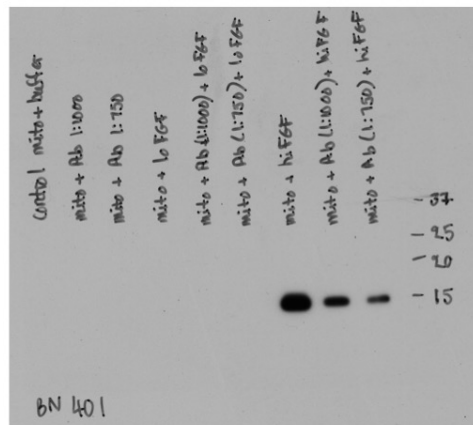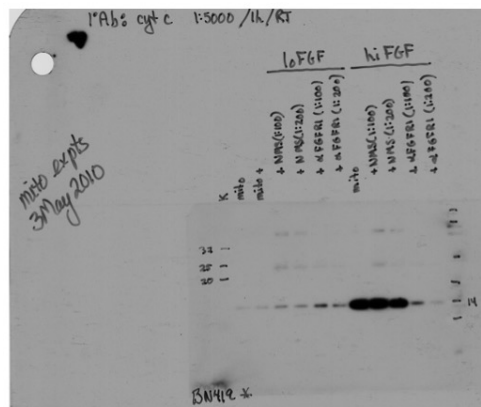

Repeat experiment: SSM and IFM treated with Lo-FGF2 in the presence and absence of FGFR1 inhibitors (SU-, PD-) and subjected to calcium overload: Cyt-C at supernatant

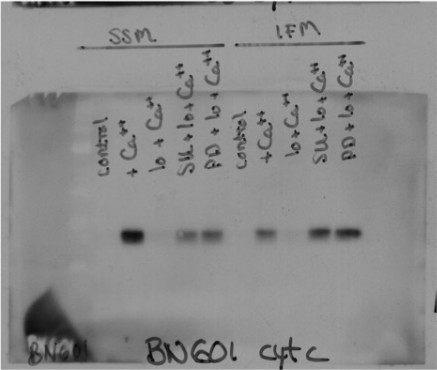

Repeat experiment: SSM treated with Lo-FGF2 in the presence and absence of FGFR1 inhibitor SU-, and subjected to calcium overload: Cyt-C at supernatant and at particulate fraction

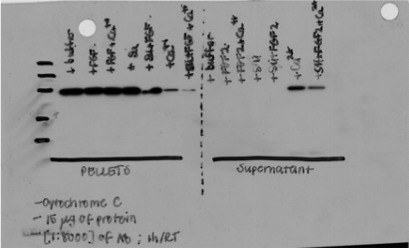

Repeat experiment: SSM treated with Lo-FGF2 in the presence and absence of FGFR1 inhibitor SU-, and subjected to calcium overload: Cyt-C at supernatant and at particulate fraction

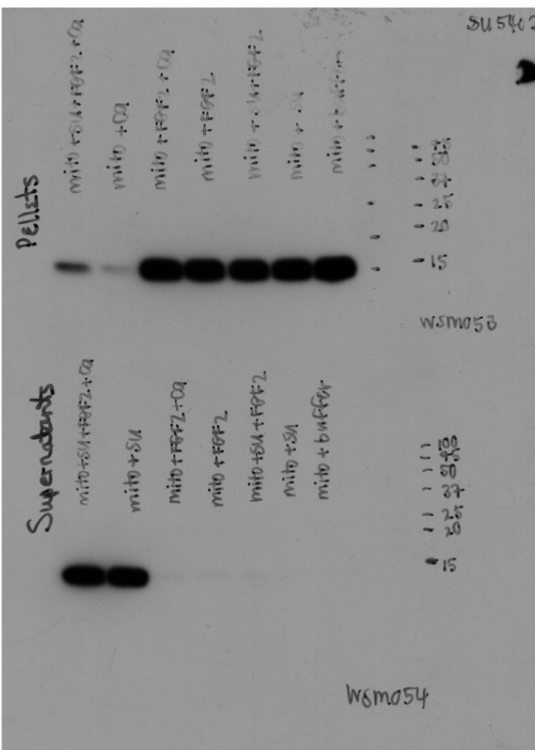

Repeat experiments: Western blots of SSM and IFM treated with Hi-FGF2 in the presence and absence of FGFR1 inhibitor PD-, SU-: Cyt-C at supernatant

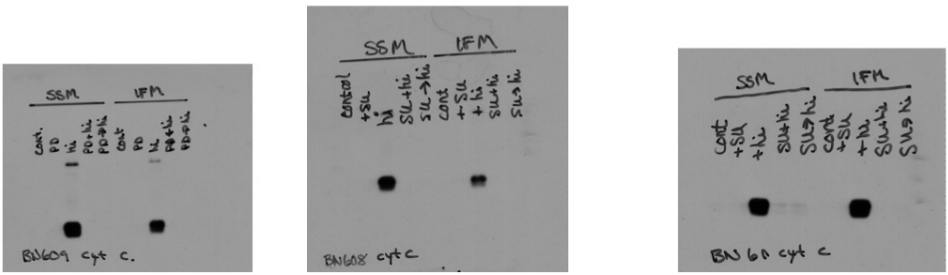

Supplement: s1 [file s1]
